# Supplementary material for: Enantioselective reaction of N-cyano imines: decarboxylative Mannich-type reaction with malonic acid half thioesters
Source: Royal Society of Chemistry journal article supplement (doi:10.1039/d1cc07191b), 2022-01-01
Supplement: d1cc07191b1.pdf [file d1cc07191b1.pdf]

## Supporting Information

# Enantioselective Reaction of *N*-Cyano Imines: Decarboxylative Mannich-type Reaction with Malonic Acid Half Thioesters

Yusuke Oyamada,<sup>[a]</sup> Kazuto Inaba,<sup>[a]</sup> Takahiro Sasamori,<sup>[c]</sup> Shuichi Nakamura\*<sup>[a,b]</sup>

*[a] Department of Life Science and Applied Chemistry, Graduate School of Engineering,  
Nagoya Institute of Technology  
Gokiso, Showa-ku, Nagoya 466-8555, Japan*

*[b] Department of Frontier Materials, Graduate School of Engineering  
Nagoya Institute of Technology, Gokiso, Showa-ku, Nagoya 466-8555, Japan  
E-mail: snakamur@nitech.ac.jp; Tel & Fax: 81-52-735-5245*

*[c] Faculty of Pure and Applied Sciences and Tsukuba Research Center for Energy Materials Science  
(TREMS)  
University of Tsukuba, 1-1-1 Tennodai, Tsukuba, Ibaraki 305-8571, Japan*

### CONTENTS:

|                                                                                                 |         |
|-------------------------------------------------------------------------------------------------|---------|
| General method.....                                                                             | S2      |
| Optimization of catalysts .....                                                                 | S3      |
| Reaction with Various Nucleophiles.....                                                         | S4      |
| Control experiments .....                                                                       | S5      |
| Typical procedure for synthesis of aldimines derived from benzaldehyde.....                     | S6-S10  |
| Typical procedure for the decarboxylative addition of malonic half thioesters to aldimines..... | S11-S17 |
| General procedure for synthetic application of products .....                                   | S18-S19 |
| Large scale experiment procedure .....                                                          | S20     |
| ESI-Mass spectroscopic analysis .....                                                           | S21-S22 |
| MO calculation.....                                                                             | S23-S30 |
| References.....                                                                                 | S31     |
| <sup>1</sup> H, <sup>13</sup> C, and <sup>19</sup> F NMR Spectra.....                           | S32-S65 |
| HPLC Charts.....                                                                                | S66-S83 |

## Experimental Section

**General method:** All reactions were performed in oven-dried glassware under a positive pressure of nitrogen. Solvents were transferred via syringe and were introduced into the reaction vessels through a rubber septum. All reactions were monitored by thin-layer chromatography (TLC) carried out on 0.25 mm Merck silica-gel (60-F254). The TLC plates were visualized with UV light. Column chromatography was carried out on a column packed with silica-gel 60N spherical neutral size 63-210  $\mu\text{m}$ . The  $^1\text{H}$  NMR (300 MHz) and  $^{19}\text{F}$  NMR (282 MHz) spectra for solution in  $\text{CDCl}_3$  or  $(\text{CD}_3)_2\text{SO}$  were recorded on Varian Mercury 300, and  $^{13}\text{C}$  NMR (125 MHz) spectra for solution in  $\text{CDCl}_3$  or  $(\text{CD}_3)_2\text{SO}$  were recorded on Bruker Avance 500. Chemical shifts ( $\delta$ ) are expressed in ppm downfield from internal TMS. HPLC analyses were performed on a SHIMADZU LC-2010A HT using 4.6 x 250 mm CHIRALPAK<sup>®</sup> IE-3, ID, AD-3 and CHIRALCEL<sup>®</sup> OD-H column. HRMS were recorded on a Waters SYNAPT G2 (ESI). ESI Mass spectra were recorded on a SHIMADZU LCMS-2020 using positive mode. Optical rotations were measured on a JASCO P-2200. Infrared spectra were recorded on a JASCO FT/IR-4600 spectrometer with ZnSe ATR unit. The imines were prepared by published procedures.<sup>1)</sup> Malonic acid half thioesters were synthesized by published procedures.<sup>2)</sup>

## Optimization of Catalysts

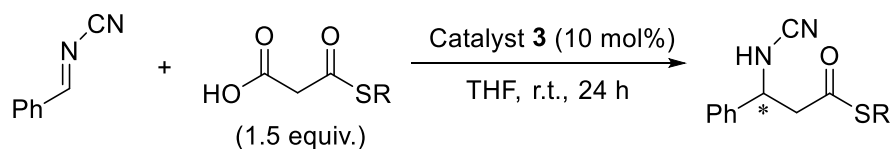

| Entry | Catalyst  | R     | Yield (%) | Ee (%)          | Entry | Catalyst   | R  | Yield (%) | Ee (%)          |
|-------|-----------|-------|-----------|-----------------|-------|------------|----|-----------|-----------------|
| 1     | <b>3e</b> | Duryl | 91        | 91 ( <i>R</i> ) | 13    | <b>3q</b>  | Ph | 80        | 45 ( <i>R</i> ) |
| 2     | <b>3f</b> | Ph    | 81        | 80 ( <i>S</i> ) | 14    | <b>3r</b>  | Ph | 77        | 7 ( <i>S</i> )  |
| 3     | <b>3g</b> | Ph    | 75        | 85 ( <i>S</i> ) | 15    | <b>3s</b>  | Ph | 99        | 5 ( <i>S</i> )  |
| 4     | <b>3h</b> | Ph    | 6         | 16 ( <i>S</i> ) | 16    | <b>3t</b>  | Ph | 91        | 8 ( <i>S</i> )  |
| 5     | <b>3i</b> | Ph    | 99        | 71 ( <i>S</i> ) | 17    | <b>3u</b>  | Ph | 91        | 2 ( <i>S</i> )  |
| 6     | <b>3j</b> | Ph    | 81        | 71 ( <i>S</i> ) | 18    | <b>3v</b>  | Ph | 63        | 2 ( <i>S</i> )  |
| 7     | <b>3k</b> | Ph    | 92        | 80 ( <i>S</i> ) | 19    | <b>3w</b>  | Ph | 57        | 2 ( <i>S</i> )  |
| 8     | <b>3l</b> | Ph    | 90        | 86 ( <i>S</i> ) | 20    | <b>3x</b>  | Ph | 47        | 5 ( <i>S</i> )  |
| 9     | <b>3m</b> | Ph    | 85        | 57 ( <i>S</i> ) | 21    | <b>3y</b>  | Ph | 19        | 1 ( <i>S</i> )  |
| 10    | <b>3n</b> | Ph    | 82        | 40 ( <i>S</i> ) | 22    | <b>3z</b>  | Ph | 50        | 44 ( <i>S</i> ) |
| 11    | <b>3o</b> | Ph    | 83        | 48 ( <i>S</i> ) | 23    | <b>3aa</b> | Ph | 96        | 77 ( <i>S</i> ) |
| 12    | <b>3p</b> | Ph    | 80        | 60 ( <i>S</i> ) | 24    | <b>3ab</b> | Ph | 91        | 81 ( <i>S</i> ) |

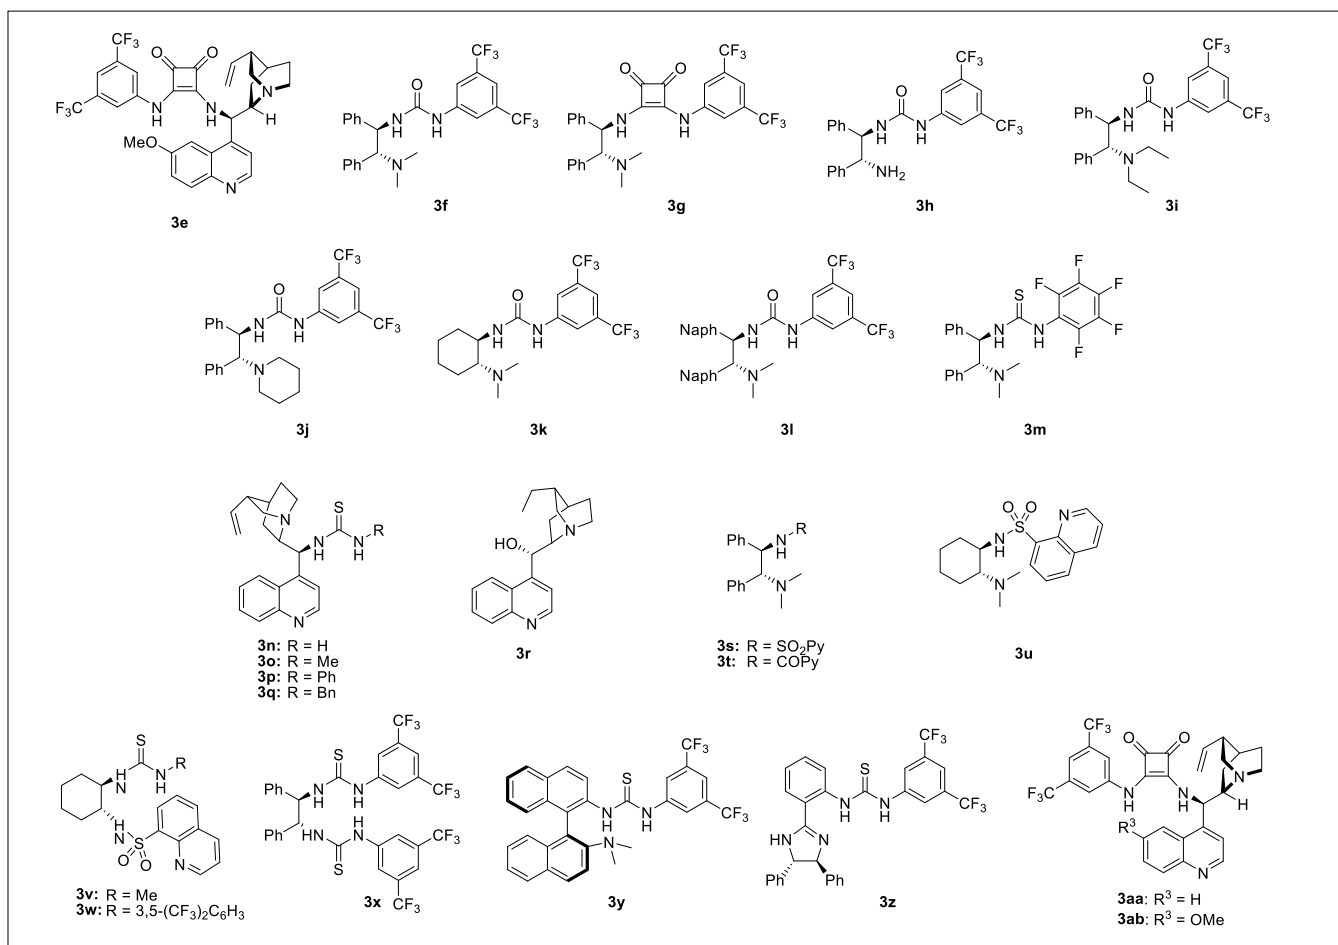

## Reaction with Various Nucleophiles

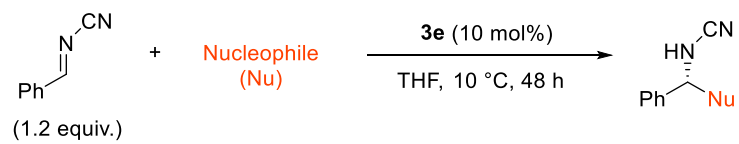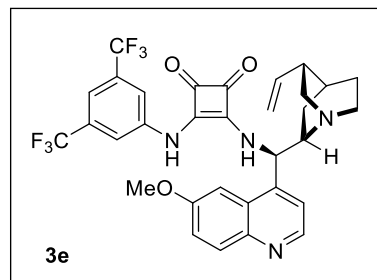

| Entry | Nucleophile | Yield (%) | Ee (%) |
|-------|-------------|-----------|--------|
| 1     |             | 96        | 50     |
| 2     |             | 86        | 18     |
| 3     |             | n.r.      | -      |
| 4     |             | n.r.      | -      |

## Control Experiments

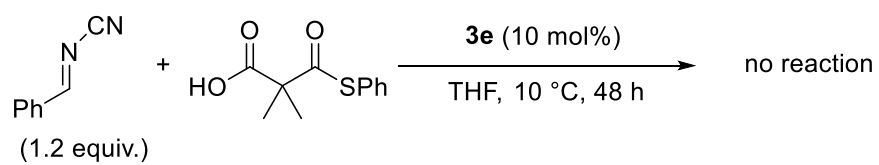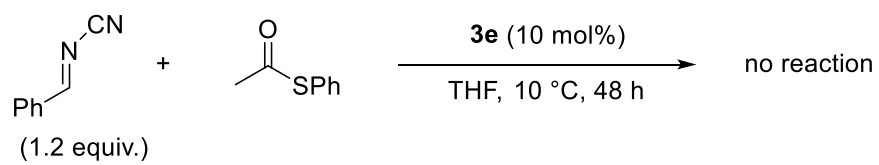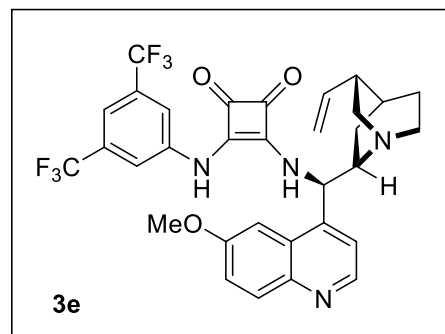

## General Procedure for Synthesis of *N*-Cyano imines<sup>1)</sup>

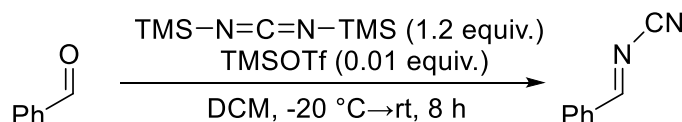

To a stirred solution of bis(trimethylsilyl)carbodiimide (2.9 mL, 12.8 mmol, 1.2 equiv.) in  $\text{CH}_2\text{Cl}_2$  (5.8 mL) was added benzaldehyde (1.1 mL, 11.6 mmol, 1.0 equiv.) at room temperature. After cooling to  $-20\text{ }^\circ\text{C}$ , trimethylsilyl trifluoromethanesulfonate (21.0  $\mu\text{L}$ , 0.12 mmol, 0.01 equiv.) was added dropwise. The reaction mixture was stirred for 30 min, and warmed to room temperature, then the reaction mixture was stirred for 8 h. The reaction mixture was recrystallized by  $\text{CH}_2\text{Cl}_2$ /hexane to give **1a** (1.45 g, 96%). The other *N*-Cyano imines **1b-1q** were synthesized by similar procedure using the corresponding aldehydes.

### *N*-Benzylidenecyanamide (**1a**)

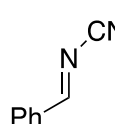 According to the general procedure, the reaction using benzaldehyde (1.1 mL, 11.6 mmol), bis(trimethylsilyl)carbodiimide (2.9 mL, 12.8 mmol), and trimethylsilyl trifluoromethanesulfonate (21.0  $\mu\text{L}$ , 0.12 mmol) gave **1a** (1.45 g, 96%) as a white solid.

mp =  $66.0\text{-}66.5\text{ }^\circ\text{C}$ ;  $^1\text{H}$  NMR ( $\text{CDCl}_3$ , 300 MHz)  $\delta$  9.02 (s, 1H), 7.93-7.90 (m, 2H), 7.73-7.68 (m, 1H),  $\delta$  7.57-7.52 (m, 2H);  $^{13}\text{C}$  NMR ( $\text{CDCl}_3$ , 125 MHz)  $\delta$  182.5, 135.9, 133.4, 130.6, 129.4, 115.8; IR (ATR) 2188, 1607, 1594, 1568, 1450, 1231, 1023, 994, 754, 680  $\text{cm}^{-1}$ ; HRMS (ESI)  $m/z$ :  $[\text{M}+\text{Na}]^+$  Calcd. for  $\text{C}_8\text{H}_6\text{N}_2\text{Na}$  153.0423; Found: 153.0414.

### *N*-(4-Fluorobenzylidene)cyanamide (**1g**)

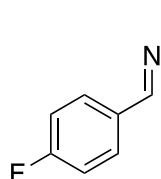 According to the general procedure, the reaction using 4-fluorobenzaldehyde (105.2  $\mu\text{L}$ , 1.0 mmol), bis(trimethylsilyl)carbodiimide (0.27 mL, 1.2 mmol), and trimethylsilyl trifluoromethanesulfonate (1.8  $\mu\text{L}$ , 0.01 mmol) gave **1g** (118.4 mg, 80%) as a white solid.

mp =  $84.1\text{-}84.9\text{ }^\circ\text{C}$ ;  $^1\text{H}$  NMR ( $\text{CDCl}_3$ , 300 MHz)  $\delta$  8.98 (s, 1H), 7.97-7.93 (m, 2H),  $\delta$  7.24-7.20 (m, 2H);  $^{19}\text{F}$  NMR ( $\text{CDCl}_3$ , 282 MHz):  $\delta$  -99.1;  $^{13}\text{C}$  NMR ( $\text{CDCl}_3$ , 125 MHz)  $\delta$  180.6, 167.5 (d,  $J_{\text{C-F}} = 259.0$  Hz), 133.1 (d,  $J_{\text{C-F}} = 9.8$  Hz), 129.8 (d,  $J_{\text{C-F}} = 2.8$  Hz), 117.0 (d,  $J_{\text{C-F}} = 22.5$  Hz),  $\delta$  115.7; IR (ATR) 2194, 1598, 1576, 1419, 1299, 1234, 1154, 1009, 997, 871, 834  $\text{cm}^{-1}$ ; HRMS (ESI)  $m/z$ :  $[\text{M}+\text{Na}]^+$  Calcd. for  $\text{C}_8\text{H}_5\text{N}_2\text{FNa}$  171.0329; Found: 171.0335.

### *N*-(4-Chlorobenzylidene)cyanamide (**1h**)

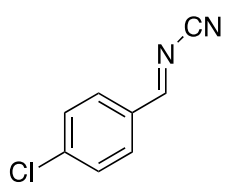

According to the general procedure, the reaction using 4-chlorobenzaldehyde (140.6 mg, 1.0 mmol), bis(trimethylsilyl)carbodiimide (0.27 mL, 1.2 mmol), and trimethylsilyl trifluoromethanesulfonate (1.8  $\mu$ L, 0.01 mmol) gave **1h** (113.6 mg, 69%) as a white solid.

mp = 147.0-147.4 °C;  $^1\text{H}$  NMR ( $\text{CDCl}_3$ , 300 MHz)  $\delta$  8.98 (s, 1H), 7.86 (d,  $J$  = 8.6 Hz, 2H), 7.52 (d,  $J$  = 8.6 Hz, 2H);  $^{13}\text{C}$  NMR ( $\text{CDCl}_3$ , 125 MHz)  $\delta$  180.9, 142.6, 131.8, 131.6, 129.9, 115.5; IR (ATR) 2195, 1592, 1561, 1488, 1382, 1230, 1174, 1278, 1089, 1005, 824  $\text{cm}^{-1}$ ; HRMS (ESI)  $m/z$ :  $[\text{M}+\text{Na}]^+$  Calcd. for  $\text{C}_8\text{H}_5\text{N}_2\text{NaCl}$  187.0033; Found: 187.0038.

### *N*-(3-Chlorobenzylidene)cyanamide (**1i**)

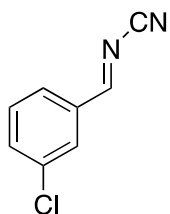

According to the general procedure, the reaction using 3-chlorobenzaldehyde (113.0  $\mu$ L, 1.0 mmol), bis(trimethylsilyl)carbodiimide (0.27 mL, 1.2 mmol), and trimethylsilyl trifluoromethanesulfonate (1.8  $\mu$ L, 0.01 mmol) gave **1i** (116.2 mg, 71%) as a white solid.

mp = 117.5-118.2 °C;  $^1\text{H}$  NMR ( $\text{CDCl}_3$ , 300 MHz)  $\delta$  8.98 (s, 1H), 7.92 (s, 1H), 7.79-7.77 (m, 1H), 7.68-7.65 (m, 1H), 7.52-7.47 (m, 1H);  $^{13}\text{C}$  NMR ( $\text{CDCl}_3$ , 125 MHz)  $\delta$  181.0, 135.8, 135.6, 134.9, 130.6, 129.6, 128.9, 115.2; IR (ATR) 2193, 1604, 1560, 1380, 1232, 1093, 1077, 995, 893, 705, 633  $\text{cm}^{-1}$ ; HRMS (ESI)  $m/z$ :  $[\text{M}+\text{H}]^+$  Calcd. for  $\text{C}_8\text{H}_6\text{N}_2\text{Cl}$  165.0214; Found: 165.0216.

### *N*-(2-Chlorobenzylidene)cyanamide (**1j**)

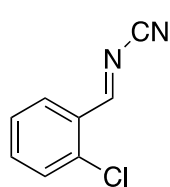

According to the general procedure, the reaction using 2-chlorobenzaldehyde (113.0 mg, 1.0 mmol), bis(trimethylsilyl)carbodiimide (0.27 mL, 1.2 mmol), and trimethylsilyl trifluoromethanesulfonate (1.8  $\mu$ L, 0.01 mmol) gave **1j** (78.8 mg, 48%) as a white solid.

mp = 81.0-81.6 °C;  $^1\text{H}$  NMR ( $\text{CDCl}_3$ , 300 MHz)  $\delta$  9.49 (s, 1H), 8.16 (d,  $J$  = 9.0 Hz, 1H), 7.64-7.59 (m, 1H), 7.52-7.50 (m, 1H), 7.44-7.39 (m, 1H);  $^{13}\text{C}$  NMR ( $\text{CDCl}_3$ , 125 MHz)  $\delta$  179.7, 139.0, 136.7, 130.7, 130.7, 128.7, 127.7, 115.8; IR (ATR) 2193, 1597, 1441, 1373, 1275, 1160, 1056, 1013, 981, 857, 766  $\text{cm}^{-1}$ ; HRMS (ESI)  $m/z$ :  $[\text{M}+\text{H}]^+$  Calcd. for  $\text{C}_8\text{H}_6\text{N}_2\text{Cl}$  165.0214; Found: 165.0217.

### ***N*-(4-Bromobenzylidene)cyanamide (1k)**

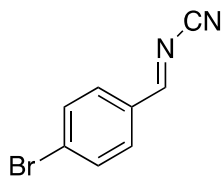

According to the general procedure, the reaction using 4-bromobenzaldehyde (185.0 mg, 1.0 mmol), bis(trimethylsilyl)carbodiimide (0.27 mL, 1.2 mmol), and trimethylsilyl trifluoromethanesulfonate (1.8  $\mu$ L, 0.01 mmol) gave **1k** (190.2 mg, 91%) as a white solid.

mp = 157.9-158.4 °C;  $^1\text{H}$  NMR ( $\text{CDCl}_3$ , 300 MHz)  $\delta$  8.97 (s, 1H),  $\delta$  7.78 (d, 2H,  $J$  = 8.6 Hz), 7.70 (d, 2H,  $J$  = 8.6 Hz);  $^{13}\text{C}$  NMR ( $\text{CDCl}_3$ , 125 MHz)  $\delta$  181.1, 132.9, 132.1, 131.6, 131.5, 115.5; IR (ATR) 2195, 1598, 1484, 1407, 1379, 1282, 1066, 1008, 995, 858, 820  $\text{cm}^{-1}$ ; HRMS (ESI)  $m/z$ :  $[\text{M}+\text{Na}]^+$  Calcd. for  $\text{C}_8\text{H}_5\text{N}_2\text{NaBr}$  230.9528; Found: 230.9539.

### ***N*-(4-Trifluoromethylbenzylidene)cyanamide (1l)**

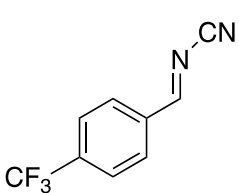

According to the general procedure, the reaction using 4-(trifluoromethyl)benzaldehyde (134.0  $\mu$ L, 1.0 mmol), bis(trimethylsilyl)carbodiimide (0.27 mL, 1.2 mmol), and trimethylsilyl trifluoromethanesulfonate (1.8  $\mu$ L, 0.01 mmol) gave **1l** (118.9 mg, 60%) as a white solid.

mp = 112.5-113.0 °C;  $^1\text{H}$  NMR ( $\text{CDCl}_3$ , 300 MHz)  $\delta$  9.09 (s, 1H), 8.05 (d, 2H,  $J$  = 8.3 Hz), 7.81 (d, 2H,  $J$  = 8.3 Hz);  $^{19}\text{F}$  NMR ( $\text{CDCl}_3$ , 282MHz)  $\delta$  -63.4;  $^{13}\text{C}$  NMR ( $\text{CDCl}_3$ , 125 MHz):  $\delta$  181.2, 136.7 (q,  $J_{\text{C-F}}$  = 32.8 Hz), 136.1, 130.7, 126.3 (q,  $J_{\text{C-F}}$  = 3.7 Hz), 123.2 (q,  $J_{\text{C-F}}$  = 257.7 Hz), 115.0; IR (ATR) 2197, 1606, 1571, 1321, 1231, 1164, 1109, 1016, 862, 839, 764  $\text{cm}^{-1}$ ; HRMS (ESI)  $m/z$ :  $[\text{M}+\text{Na}]^+$  Calcd. for  $\text{C}_9\text{H}_5\text{N}_2\text{F}_3\text{Na}$  221.0297; Found: 221.0302.

### ***N*-(4-Methylbenzylidene)cyanamide (1m)**

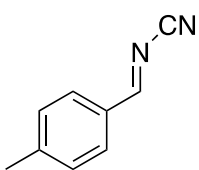

According to the general procedure, the reaction using 4-methylbenzaldehyde (117.8  $\mu$ L, 1.0 mmol), bis(trimethylsilyl)carbodiimide (0.27 mL, 1.2 mmol), and trimethylsilyl trifluoromethanesulfonate (1.8  $\mu$ L, 0.01 mmol) gave **1m** (93.7 mg, 65%) as a white solid.

mp = 93.5-94.2 °C;  $^1\text{H}$  NMR ( $\text{CDCl}_3$ , 300 MHz)  $\delta$  8.96 (s, 1H), 7.80 (d, 2H,  $J$  = 8.0 Hz), 7.34 (d, 2H,  $J$  = 8.0 Hz), 2.47 (s, 3H);  $^{13}\text{C}$  NMR ( $\text{CDCl}_3$ , 125 MHz)  $\delta$  181.6, 147.3, 130.6, 130.3, 129.8, 115.8, 21.8; IR (ATR) 2189, 1590, 1557, 1509, 1379, 1235, 1166, 1044, 866, 775, 637  $\text{cm}^{-1}$ ; HRMS (ESI)  $m/z$ :  $[\text{M}+\text{Na}]^+$  Calcd. for  $\text{C}_9\text{H}_8\text{N}_2\text{Na}$  167.0580; Found: 167.0598.



### *N*-(4-Methoxybenzylidene)cyanamide (**1n**)

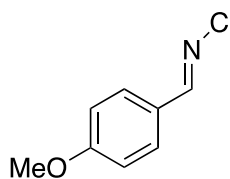

According to the general procedure, the reaction using 4-methoxybenzaldehyde (121.6  $\mu$ L, 1.0 mmol), bis(trimethylsilyl)carbodiimide (0.27 mL, 1.2 mmol), and trimethylsilyl trifluoromethanesulfonate (1.8  $\mu$ L, 0.01 mmol) gave **1n** (124.9 mg, 78%) as a white solid.

mp = 123.5-124.0  $^{\circ}$ C;  $^1$ H NMR ( $\text{CDCl}_3$ , 300 MHz)  $\delta$  8.89 (s, 1H), 7.86 (d, 2H,  $J$  = 8.9 Hz), 7.01 (d, 2H,  $J$  = 8.9 Hz), 3.92 (s, 3H);  $^{13}$ C NMR ( $\text{CDCl}_3$ , 125 MHz)  $\delta$  180.6, 166.0, 133.0, 126.4, 116.6, 114.9, 55.8; IR (ATR) 2180, 1592, 1509, 1427, 1301, 1112, 1002, 995, 836, 632, 604  $\text{cm}^{-1}$ ; HRMS (ESI)  $m/z$ :  $[\text{M}+\text{Na}]^+$  Calcd. for  $\text{C}_9\text{H}_8\text{N}_2\text{ONa}$  183.0529; Found: 183.0542.

### *N*-(2-Naphthylidene)cyanamide (**1o**)

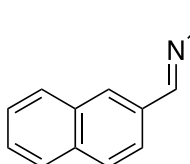

According to the general procedure, the reaction using 2-naphthaldehyde (156.2 mg, 1.0 mmol), bis(trimethylsilyl)carbodiimide (0.27 mL, 1.2 mmol), and trimethylsilyl trifluoromethanesulfonate (1.8  $\mu$ L, 0.01 mmol) gave **1o** (99.1 mg, 55%) as a white solid.

mp = 105.0-105.8  $^{\circ}$ C;  $^1$ H NMR ( $\text{CDCl}_3$ , 300 MHz)  $\delta$  9.15 (s, 1H), 8.30 (s, 1H), 8.03-7.91 (m, 4H), 7.72-7.59 (m, 2H);  $^{13}$ C NMR ( $\text{CDCl}_3$ , 125 MHz)  $\delta$  182.1, 137.0, 136.3, 132.6, 131.2, 130.1, 129.7, 129.6, 128.2, 127.6, 122.6, 116.1; IR (ATR) 2189, 1625, 1590, 1371, 1269, 1178, 1016, 891, 817, 777, 754  $\text{cm}^{-1}$ ; HRMS (ESI)  $m/z$ : Calcd. for  $\text{C}_{12}\text{H}_8\text{N}_2\text{Na}$  203.0580; Found: 203.0586.

### *N*-(2-Furylidene)cyanamide (**1p**)

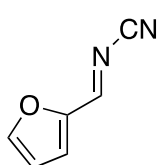

According to the general procedure, the reaction using furfural (82.8  $\mu$ L, 1.0 mmol), bis(trimethylsilyl)carbodiimide (0.27 mL, 1.2 mmol), and trimethylsilyl trifluoromethanesulfonate (1.8  $\mu$ L, 0.01 mmol) gave **1p** (52.8 mg, 44%) as a white solid.

mp = 92.0-92.8  $^{\circ}$ C;  $^1$ H NMR ( $\text{CDCl}_3$ , 300 MHz)  $\delta$  8.68 (s, 1H), 7.82-7.79 (m, 1H), 7.40-7.38 (m, 1H), 6.74-6.70 (m, 1H);  $^{13}$ C NMR ( $\text{CDCl}_3$ , 125 MHz)  $\delta$  166.2, 150.6, 149.2, 115.9, 114.3, 114.1; IR (ATR) 3112, 2191, 1536, 1465, 1397, 1304, 1021, 1007, 976, 881, 772  $\text{cm}^{-1}$ ; HRMS (ESI)  $m/z$ :  $[\text{M}+\text{Na}]^+$  Calcd. for  $\text{C}_6\text{H}_4\text{N}_2\text{ONa}$  143.0216; Found: 143.0216.

### ***N*-(2-Thienylidene)cyanamide (**1q**)**

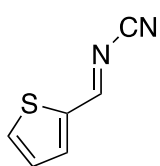

According to the general procedure, the reaction using 2-thiophenecarboxaldehyde (91.2  $\mu\text{L}$ , 1.0 mmol), bis(trimethylsilyl)carbodiimide (0.27 mL, 1.2 mmol), and trimethylsilyl trifluoromethanesulfonate (1.8  $\mu\text{L}$ , 0.01 mmol) gave **1q** (104.9 mg, 77%) as a white solid.

mp = 73.1-73.9  $^{\circ}\text{C}$ ;  $^1\text{H}$  NMR ( $\text{CDCl}_3$ , 300 MHz)  $\delta$  9.03 (s, 1H), 7.85-7.78 (m, 2H), 7.28-7.26 (m, 1H);  $^{13}\text{C}$  NMR ( $\text{CDCl}_3$ , 125 MHz)  $\delta$  173.0, 139.4, 139.4, 137.4, 129.3, 115.7; IR (ATR) 2184, 1573, 1513, 1414, 1375, 1256, 1050, 1023, 1003, 982, 846  $\text{cm}^{-1}$ ; HRMS (ESI)  $m/z$ :  $[\text{M}+\text{Na}]^+$  Calcd. for  $\text{C}_6\text{H}_4\text{N}_2\text{NaS}$  158.9987; Found: 159.0002.

**General procedure for the enantioselective decarboxylative Mannich reaction of malonic acid half thioesters with *N*-cyano imines catalyzed by chiral organocatalysts**

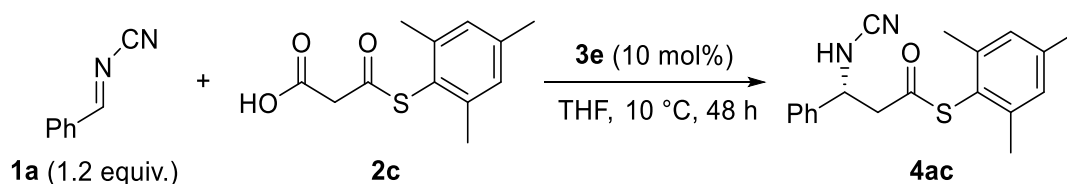

*N*-Cyano imine **1a** (6.3 mg, 0.048 mmol, 1.2 equiv.), **2c** (9.6 mg, 0.040 mmol, 1.0 equiv.), and **3e** (2.5 mg, 0.004 mmol, 10 mol%) in THF was stirred for 48 h at 10 °C. After removal solvent, the residue was purified by silica gel column chromatography (eluent: Hexane/AcOEt, 70:30) to afford (*R*)-**4aa** (11.2mg, 99%) as a yellow oil.

**(*R*)-*S*-Phenyl 3-phenyl-3-(cyanoamino)propanethioate (4aa)**

Reaction of **1a** (6.3 mg, 0.048 mmol), **2a** (7.9 mg, 0.04 mmol) and **3e** (2.5 mg, 0.004 mmol) in THF (1.0 mL) at r.t. for 24 h. After removal of solvent, the residue was purified by silica gel column chromatography (eluent: Hexane/AcOEt, 70:30) gave **4aa** (11.2 mg, 99%, 85% ee) as a pale yellow oil.

$[\alpha]_{\text{D}}^{25} +54.3$  (80% ee, *c* 0.58, CHCl<sub>3</sub>); <sup>1</sup>H NMR (CDCl<sub>3</sub>, 300 MHz) δ 7.45-7.33 (m, 10H), 4.81 (br, 1H), 4.74-4.69 (m, 1H), 3.28-3.09 (m, 2H); <sup>13</sup>C NMR (CDCl<sub>3</sub>, 125 MHz) δ 196.1, 137.6, 134.4, 130.0, 129.4, 129.1, 129.1, 126.8, 126.4, 114.3, 56.8, 48.3; IR (ATR) 2219, 1709, 1478, 1454, 1358, 1220, 1059, 1024, 975, 747, 689 cm<sup>-1</sup>; HRMS (ESI) *m/z*: [M+Na]<sup>+</sup> Calcd. for C<sub>16</sub>H<sub>14</sub>N<sub>2</sub>ONaS 305.0719; Found: 305.0719; HPLC (CHIRALPAK IE-3, Hexane/*i*PrOH = 90:10, 1.0 mL/min, 254 nm) 80% ee, *t<sub>R</sub>* 20.4 (major), *t<sub>R</sub>* 23.3 (minor) min.

**(*S*)-*S*-Phenyl 3-phenyl-3-(tosylamino)propanethioate (4ba)**

Reaction of **1b** (12.5 mg, 0.048 mmol), **2a** (7.9 mg, 0.04 mmol) and **3a** (2.0 mg, 0.004 mmol) in THF (1.0 mL) at r.t. for 24 h. After removal of solvent, the residue was purified by silica gel column chromatography (eluent: Hexane/AcOEt, 80:20) gave **4ba** (16.0 mg, 97%, 45% ee) as a white solid.

$[\alpha]_{\text{D}}^{25} +113.8$  (45% ee, *c* 0.58, CHCl<sub>3</sub>); <sup>1</sup>H NMR (CDCl<sub>3</sub>, 300 MHz) δ 7.60-7.57 (m, 2H), 7.39-7.34 (m, 3H), 7.24-7.08 (m, 9H), 5.61 (d, *J* = 6.0 Hz, 1H), 4.77 (ddd, 1H, *J* = 6.0, 6.0, 6.2 Hz), 3.18 (dd, 1H, *J* = 6.0, 15.6 Hz), 3.06 (dd, 1H, *J* = 6.2, 15.6 Hz), 2.37 (s, 3H); <sup>13</sup>C NMR (CDCl<sub>3</sub>, 125 MHz) δ 195.6, 143.3, 138.8, 137.2, 134.3, 129.7, 129.5, 129.3, 128.6, 127.9, 127.1, 126.8, 126.5, 55.0, 49.4, 21.5; IR (ATR) 3260, 1712, 1683, 1441, 1358, 1159, 1058, 942, 754, 665 cm<sup>-1</sup>; HRMS (ESI) *m/z*: [M+Na]<sup>+</sup> Calcd. for

C<sub>22</sub>H<sub>21</sub>NO<sub>3</sub>NaS 434.0855; Found: 434.0860; HPLC (CHIRALCEL OD-H, Hexane/*i*PrOH = 90:10, 1.0 mL/min, 254 nm) 45% ee, *t*<sub>R</sub> 21.8 (minor), *t*<sub>R</sub> 24.3 (major) min.

**(*R*)-*S*-(4-Bromophenyl) 3-phenyl-3-(cyanoamino)propanethioate (**4ab**)**

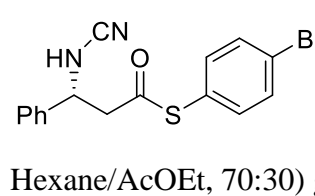 Reaction of **1a** (6.3 mg, 0.048 mmol), **2b** (11.0 mg, 0.04 mmol) and **3e** (2.5 mg, 0.004 mmol) in THF (1.0 mL) at r.t. for 24 h. After removal of solvent, the residue was purified by silica gel column chromatography (eluent: Hexane/AcOEt, 70:30) gave **4ab** (13.2 mg, 91%, 76% ee) as a pale yellow solid.

mp = 85.5-86.0 °C; [ $\alpha$ ]<sub>D</sub><sup>25</sup> -56.0 (75% ee, *c* 0.58, CHCl<sub>3</sub>); <sup>1</sup>H NMR (CDCl<sub>3</sub>, 300 MHz)  $\delta$  7.59-7.20 (m, 9H), 4.76-4.70 (m, 1H), 4.65 (br, 1H), 3.27 (dd, 1H, *J* = 4.7, 16.2 Hz), 3.14 (dd, 1H, *J* = 4.7, 16.2 Hz); <sup>13</sup>C NMR (CDCl<sub>3</sub>, 125 MHz)  $\delta$  195.4, 137.5, 135.9, 132.7, 129.2, 129.2, 126.8, 126.8, 125.4, 124.8, 114.0, 56.8, 48.4; IR (KBr) 2920, 2218, 1711, 1471, 1359, 1219, 1066, 1007, 813, 697 cm<sup>-1</sup>; HRMS (ESI) *m/z*: [M+Na]<sup>+</sup> Calcd. for C<sub>16</sub>H<sub>13</sub>N<sub>2</sub>ONaSBr 382.9824; Found: 382.9827; HPLC (CHIRALPAK IE-3, Hexane/*i*PrOH = 90:10, 1.0 mL/min, 254nm) 76% ee, *t*<sub>R</sub> 34.3 (major), *t*<sub>R</sub> 39.3 (minor) min.

Absolute configuration was determined by X-ray crystal analysis: Hexane was slowly added to the sample tube containing the sample dissolved in chloroform. Once the crystals precipitated, they were allowed to stand for a day in the refrigerator. After recrystallization, the enantioselectivity of the crystals was 92% ee.

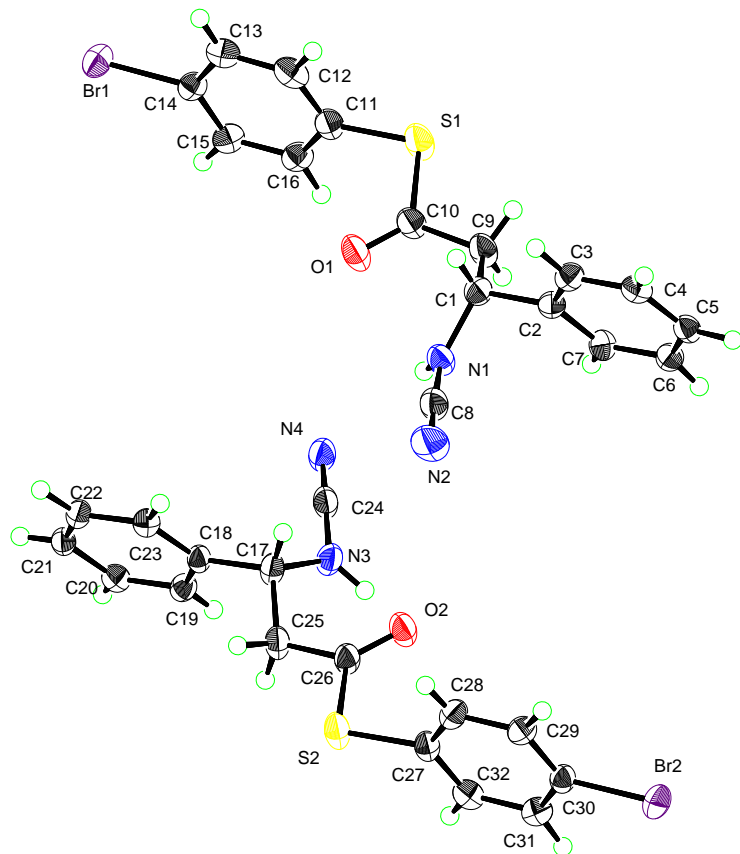

**Figure S1.** X-ray crystallography analysis for (*R*)-**4ab** (CCDC No. 2054566).

**(R)-S-(2,4,6-Trimethylphenyl) 3-phenyl-3-(cyanoamino)propanethioate (4ac)**

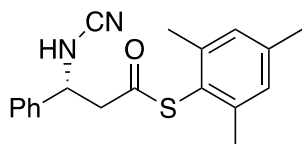

Reaction of **1a** (6.3 mg, 0.048 mmol), **2c** (9.6 mg, 0.04 mmol) and **3e** (2.5 mg, 0.004 mmol) in THF (1.0 mL) at 10 °C for 48 h. After removal of solvent, the residue was purified by silica gel column chromatography (eluent:

Hexane/AcOEt, 70:30) gave **4ac** (12.9 mg, 99%, 95% ee) as a yellow oil.

$[\alpha]_D^{25} +49.9$  (95% ee, *c* 0.58, CHCl<sub>3</sub>); <sup>1</sup>H NMR (CDCl<sub>3</sub>, 300 MHz) δ 7.40-7.34 (m, 5H), 6.97 (s, 2H), 4.79 (br, 1H), 4.74-4.68 (m, 1H), 3.30-3.13 (m, 2H), 2.29 (s, 3H), 2.19 (s, 6H); <sup>13</sup>C NMR (CDCl<sub>3</sub>, 125 MHz) δ 195.7, 142.4, 140.6, 137.7, 129.4, 129.1, 129.0, 126.8, 122.5, 114.3, 57.1, 48.0, 21.4, 21.2; IR (ATR) 2214, 1713, 1666, 1417, 1220, 1092, 1008, 851, 698, 681 cm<sup>-1</sup>; HRMS (ESI) *m/z*: [M+Na]<sup>+</sup> Calcd. for C<sub>19</sub>H<sub>20</sub>N<sub>2</sub>ONaS 347.1189; Found: 347.1204; HPLC (CHIRALPAK IE-3, Hexane/<sup>i</sup>PrOH = 90:10, 1.0 mL/min, 254 nm) 95% ee, *t<sub>R</sub>* 18.2 (major), *t<sub>R</sub>* 21.0 (minor) min.

**(R)-S-(2,4,6-Trimethylphenyl) 3-(4-fluorophenyl)-3-(cyanoamino)propanethioate (5)**

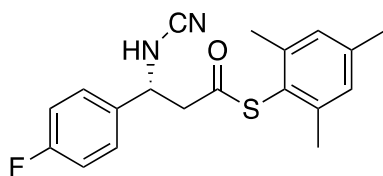

Reaction of **1g** (7.1 mg, 0.048 mmol), **2c** (9.6 mg, 0.04 mmol) and **3e** (2.5 mg, 0.004 mmol) in THF (1.0 mL) at 10 °C for 72 h. After removal of solvent, the residue was purified by silica gel column chromatography (eluent: Hexane/AcOEt, 70:30) gave **5** (12.2 mg, 89%, 95% ee) as a pale yellow oil.

$[\alpha]_D^{25} -2.8$  (95% ee, *c* 0.58, CHCl<sub>3</sub>); <sup>1</sup>H NMR (CDCl<sub>3</sub>, 300 MHz) δ 7.38-7.33 (m, 2H), 7.12-7.07 (m, 2H), 6.97 (s, 2H), 4.78 (br, 1H), 4.73-4.67 (m, 1H), 3.27-3.11 (m, 2H), 2.29 (s, 3H), 2.20 (s, 6H); <sup>19</sup>F NMR (CDCl<sub>3</sub>, 282 MHz) δ -112.4; <sup>13</sup>C NMR (CDCl<sub>3</sub>, 125 MHz) δ 195.7, 162.9 (d, *J*<sub>C-F</sub> = 247.0 Hz), 142.3, 140.6, 133.4 (d, *J*<sub>C-F</sub> = 3.2 Hz), 129.4, 128.7 (d, *J*<sub>C-F</sub> = 8.4 Hz), 122.3, 116.1 (d, *J*<sub>C-F</sub> = 21.7 Hz), 114.0, 56.4, 48.0, 21.4, 21.1; IR (ATR) 2212, 1713, 1667, 1511, 1445, 1414, 1284, 1161, 1006, 846 cm<sup>-1</sup>; HRMS (ESI) *m/z*: [M+Na]<sup>+</sup> Calcd. for C<sub>19</sub>H<sub>19</sub>N<sub>2</sub>ONaSF 365.1100; Found: 365.1094; HPLC (CHIRALPAK IE-3, Hexane/<sup>i</sup>PrOH = 90:10, 1.0 mL/min, 254 nm) 95% ee, *t<sub>R</sub>* 14.7 (major), *t<sub>R</sub>* 17.6 (minor) min.

**(R)-S-(2,4,6-Trimethylphenyl) 3-(4-chlorophenyl)-3-(cyanoamino)propanethioate (6)**

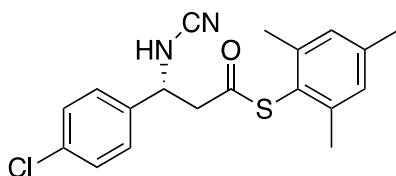

Reaction of **1h** (7.9 mg, 0.048 mmol), **2c** (9.6 mg, 0.04 mmol) and **3e** (2.5 mg, 0.004 mmol) in THF (1.0 mL) at 10 °C for 48 h. After removal of solvent, the residue was purified by silica gel column chromatography (eluent: Hexane/AcOEt, 70:30) gave **6** (12.6 mg, 88%,

94% ee) as a pale yellow oil.

$[\alpha]_D^{25} -11.4$  (94% ee, *c* 0.58, CHCl<sub>3</sub>); <sup>1</sup>H NMR (CDCl<sub>3</sub>, 300 MHz) δ 7.40-7.29 (m, 4H), 6.98 (s, 2H), 4.80 (br, 1H), 4.72-4.66 (m, 1H), 3.23 (dd, 1H, *J* = 5.1, 16.0 Hz), 3.14 (dd, 1H, *J* = 5.1, 16.0 Hz), 2.29 (s,

3H), 2.20 (s, 6H);  $^{13}\text{C}$  NMR ( $\text{CDCl}_3$ , 125 MHz)  $\delta$  195.7, 142.3, 140.7, 136.1, 135.0, 129.4, 129.4, 128.2, 122.2, 114.0, 56.5, 47.8, 21.4, 21.2; IR (ATR) 2220, 1711, 1435, 1359, 1219, 1091, 1013, 979, 851, 754  $\text{cm}^{-1}$ ; HRMS (ESI)  $m/z$ :  $[\text{M}+\text{Na}]^+$  Calcd. for  $\text{C}_{19}\text{H}_{19}\text{N}_2\text{ONaSCl}$  381.0799; Found: 381.0800(100.0%),  $[\text{M}+\text{Na}+2]^+$  383.0775, Found: 383.0770(35.7 %); HPLC (CHIRALPAK IE-3, Hexane/ $i$ PrOH = 90:10, 1.0 mL/min, 254 nm) 94% ee,  $t_R$  14.4 (major),  $t_R$  17.4 (minor) min.

**(R)-S-(2,4,6-Trimethylphenyl) 3-(3-chlorophenyl)-3-(cyanoamino)propanethioate (7)**

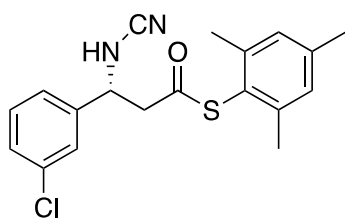

Reaction of **1i** (7.9 mg, 0.048 mmol), **2c** (9.6 mg, 0.04 mmol) and **3e** (2.5 mg, 0.004 mmol) in THF (1.0 mL) at 10 °C for 48 h. After removal of solvent, the residue was purified by silica gel column chromatography (eluent: Hexane/AcOEt, 70:30) gave **7** (13.2 mg, 92%, 88% ee) as a pale yellow oil.

$[\alpha]_{\text{D}}^{25}$  +17.7 (88% ee,  $c$  0.58,  $\text{CHCl}_3$ );  $^1\text{H}$  NMR ( $\text{CDCl}_3$ , 300 MHz)  $\delta$  7.35 (s, 3H), 7.28 (s, 1H), 6.98 (s, 2H), 4.86 (br, 1H), 4.71-4.65 (m, 1H), 3.23 (dd, 1H,  $J$  = 5.2, 16.0 Hz), 3.15 (dd, 1H,  $J$  = 5.2, 16.0 Hz), 2.29 (s, 3H), 2.20 (s, 6H);  $^{13}\text{C}$  NMR ( $\text{CDCl}_3$ , 125 MHz)  $\delta$  195.6, 142.3, 140.7, 139.7, 135.1, 130.4, 129.4, 129.2, 127.0, 125.0, 122.2, 113.9, 56.7, 47.7, 21.4, 21.2; IR (ATR) 3005, 2221, 1711, 1433, 1359, 1219, 1092, 852, 790, 756  $\text{cm}^{-1}$ ; HRMS (ESI)  $m/z$ :  $[\text{M}+\text{Na}]^+$  Calcd. for  $\text{C}_{19}\text{H}_{19}\text{N}_2\text{ONaSCl}$  381.0799; Found: 381.0810,  $[\text{M}+\text{Na}+2]^+$  383.0770, Found: 383.0778 (36.4 %); HPLC (CHIRALPAK IE-3, Hexane/ $i$ PrOH = 90:10, 1.0 mL/min, 254 nm) 88% ee,  $t_R$  18.2 (major),  $t_R$  20.6 (minor) min.

**(R)-S-(2,4,6-Trimethylphenyl) 3-(2-chlorophenyl)-3-(cyanoamino)propanethioate (8)**

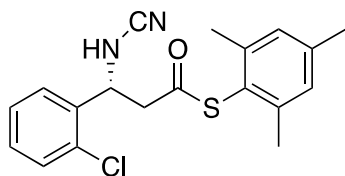

Reaction of **1j** (7.9 mg, 0.048 mmol), **2c** (9.6 mg, 0.04 mmol) and **3e** (2.5 mg, 0.004 mmol) in THF (1.0 mL) at 10 °C for 48 h. After removal of solvent, the residue was purified by silica gel column chromatography (eluent: Hexane/AcOEt, 70:30) gave **8** (13.8 mg, 96%, 95% ee) as a pale yellow oil.

yellow oil.

$[\alpha]_{\text{D}}^{25}$  +52.3 (95% ee,  $c$  0.58,  $\text{CHCl}_3$ );  $^1\text{H}$  NMR ( $\text{CDCl}_3$ , 300 MHz)  $\delta$  7.48-7.31 (m, 4H), 6.97 (s, 2H), 5.18-5.12 (m, 1H), 5.08 (br, 1H), 3.27 (dd, 1H,  $J$  = 7.3, 16.0 Hz), 3.20 (dd, 1H,  $J$  = 5.2, 16.0 Hz), 2.29 (s, 3H), 2.17 (s, 6H);  $^{13}\text{C}$  NMR ( $\text{CDCl}_3$ , 125 MHz)  $\delta$  196.0, 142.3, 140.6, 135.0, 132.7, 130.3, 130.0, 129.4, 127.8, 127.6, 122.4, 114.0, 54.2, 45.8, 21.4, 21.2; IR (ATR) 2921, 2225, 1711, 1679, 1457, 1358, 1220, 1029, 981, 843, 695  $\text{cm}^{-1}$ ; HRMS (ESI)  $m/z$ :  $[\text{M}+\text{Na}]^+$  Calcd. for  $\text{C}_{19}\text{H}_{19}\text{N}_2\text{ONaSCl}$  381.0799; Found: 381.0813  $[\text{M}+\text{Na}+2]^+$  383.0770, Found: 383.0784 (36.2 %); HPLC (CHIRALPAK IE-3, Hexane/ $i$ PrOH = 90:10, 1.0 mL/min, 254 nm) 95% ee,  $t_R$  18.6 (major),  $t_R$  20.5 (minor) min.

**(R)-S-(2,4,6-Trimethylphenyl) 3-(4-bromophenyl)-3-(cyanoamino)propanethioate (9)**

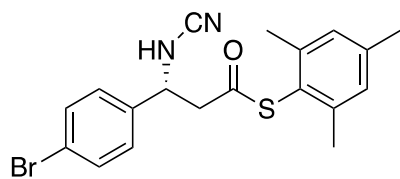

Reaction of **1k** (10.0 mg, 0.048 mmol), **2c** (9.6 mg, 0.04 mmol) and **3e** (2.5 mg, 0.004 mmol) in THF (1.0 mL) at 10 °C for 48 h. After removal of solvent, the residue was purified by silica gel column chromatography (eluent: Hexane/AcOEt, 70:30) gave **9** (13.9 mg, 86%, 93% ee) as a pale yellow amorphous solid.

$[\alpha]_{\text{D}}^{25}$   $-38.2$  (93% ee,  $c$  0.58,  $\text{CHCl}_3$ );  $^1\text{H NMR}$  ( $\text{CDCl}_3$ , 300 MHz)  $\delta$  7.54 (d,  $J = 8.6$  Hz, 2H), 7.25 (d, 2H,  $J = 8.6$  Hz), 6.98 (s, 2H), 4.81 (br, 1H), 4.70-4.65 (m, 1H), 3.26-3.10 (m, 2H), 2.29 (s, 3H), 2.20 (s, 6H);  $^{13}\text{C NMR}$  ( $\text{CDCl}_3$ , 125 MHz)  $\delta$  195.7, 142.3, 140.7, 136.6, 132.3, 129.4, 128.5, 123.1, 122.2, 114.0, 56.6, 47.8, 21.4, 21.2; IR (ATR) 2921, 2220, 1711, 1488, 1435, 1219, 1073, 1009, 851, 751  $\text{cm}^{-1}$ ; HRMS (ESI)  $m/z$ :  $[\text{M}+\text{Na}]^+$  Calcd. for  $\text{C}_{19}\text{H}_{19}\text{N}_2\text{ONaSBr}$  425.0294; Found: 425.0306 (95.1%),  $[\text{M}+\text{Na}+2]^+$  427.0274, Found: 427.0282 (100.0%); HPLC (CHIRALPAK IE-3, Hexane/ $i$ PrOH = 90:10, 1.0 mL/min, 254 nm) 93% ee,  $t_{\text{R}}$  15.2 (major),  $t_{\text{R}}$  18.5 (minor) min.

**(R)-S-(2,4,6-Trimethylphenyl) 3-(4-trifluoromethylphenyl)-3-(cyanoamino)propanethioate (10)**

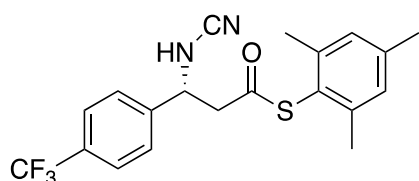

Reaction of **1l** (9.5 mg, 0.048 mmol), **2c** (9.6 mg, 0.04 mmol) and **3e** (2.5 mg, 0.004 mmol) in THF (1.0 mL) at 10 °C for 48 h. After removal of solvent, the residue was purified by silica gel column chromatography (eluent: Hexane/AcOEt, 70:30) gave **10** (15.6 mg, 99%, 93% ee) as a pale yellow oil.

$[\alpha]_{\text{D}}^{25}$   $+15.4$  (93% ee,  $c$  0.58,  $\text{CHCl}_3$ );  $^1\text{H NMR}$  ( $\text{CDCl}_3$ , 300 MHz)  $\delta$  7.69-7.66 (m, 2H), 7.51-7.49 (m, 2H), 6.97 (s, 2H), 4.93 (br, 1H), 4.80-4.75 (m, 1H), 3.30-3.14 (m, 2H), 2.29 (s, 3H), 2.17 (s, 6H);  $^{19}\text{F NMR}$  ( $\text{CDCl}_3$ , 282MHz):  $\delta$   $-62.8$ ;  $^{13}\text{C NMR}$  ( $\text{CDCl}_3$ , 125 MHz)  $\delta$  195.6, 142.6, 141.6, 140.8, 131.3 (q,  $J_{\text{C-F}} = 32.6$  Hz), 129.5, 127.3, 127.0, 126.2 (q,  $J_{\text{C-F}} = 3.8$  Hz), 123.8 (q,  $J_{\text{C-F}} = 270.6$  Hz), 122.1, 113.9, 56.7, 47.7, 21.3, 21.2; IR (ATR) 2924, 2222, 1712, 1620, 1421, 1359, 1219, 1165, 1068, 978, 847  $\text{cm}^{-1}$ ; HRMS (ESI)  $m/z$ :  $[\text{M}+\text{Na}]^+$  Calcd. for  $\text{C}_{20}\text{H}_{19}\text{N}_2\text{ONaSF}_3$  415.1062; Found: 415.1062; HPLC (CHIRALPAK IE-3, Hexane/ $i$ PrOH = 90:10, 0.5 mL/min, 254 nm) 93% ee,  $t_{\text{R}}$  28.9 (major),  $t_{\text{R}}$  36.3 (minor) min.

**(R)-S-(2,4,6-Trimethylphenyl) 3-(4-methylphenyl)-3-(cyanoamino)propanethioate (11)**

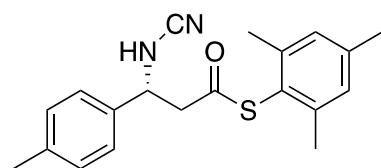

Reaction of **1m** (6.9 mg, 0.048 mmol), **2c** (9.6 mg, 0.04 mmol) and **3e** (2.5 mg, 0.004 mmol) in THF (1.0 mL) at 10 °C for 48 h. After removal of solvent, the residue was purified by silica gel column chromatography (eluent: Hexane/AcOEt, 70:30) gave **11** (13.0 mg, 96%, 92% ee) as a pale yellow oil.

$[\alpha]_{\text{D}}^{25} +55.4$  (92% ee,  $c$  0.58,  $\text{CHCl}_3$ );  $^1\text{H NMR}$  ( $\text{CDCl}_3$ , 300 MHz)  $\delta$  7.23-7.19 (m, 4H), 6.97 (s, 2H), 4.70-4.64 (m, 2H), 3.28-3.11 (m, 2H), 2.35 (s, 3H), 2.29 (s, 3H), 2.21 (s, 6H);  $^{13}\text{C NMR}$  ( $\text{CDCl}_3$ , 125 MHz)  $\delta$  195.8, 142.4, 140.5, 138.9, 134.6, 129.8, 129.4, 126.8, 122.5, 114.3, 56.9, 48.1, 21.4, 21.2; IR (ATR) 2918, 2218, 1711, 1601, 1515, 1436, 1220, 1151, 978, 851  $\text{cm}^{-1}$ ; HRMS (ESI)  $m/z$ :  $[\text{M}+\text{Na}]^+$  Calcd. for  $\text{C}_{20}\text{H}_{22}\text{N}_2\text{ONaS}$  361.1345; Found: 361.1347; HPLC (CHIRALPAK IE-3, Hexane/ $i$ PrOH = 90:10, 1.0 mL/min, 254 nm) 92% ee,  $t_{\text{R}}$  22.3 (major),  $t_{\text{R}}$  25.6 (minor) min.

### (*R*)-*S*-(2,4,6-Trimethylphenyl) 3-(4-methoxyphenyl)-3-(cyanoamino)propanethioate (**12**)

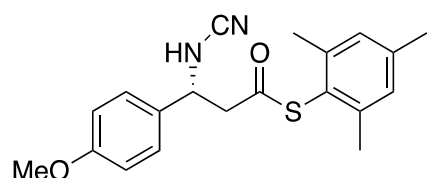

Reaction of **1n** (7.7 mg, 0.048 mmol), **2c** (9.6 mg, 0.04 mmol) and **3e** (2.5 mg, 0.004 mmol) in THF (1.0 mL) at 10 °C for 48 h. After removal of solvent, the residue was purified by silica gel column chromatography (eluent: Hexane/AcOEt, 70:30) gave **12** (14.1 mg, 99%, 88% ee) as a pale yellow oil.

$[\alpha]_{\text{D}}^{25} +44.6$  (88% ee,  $c$  0.58,  $\text{CHCl}_3$ );  $^1\text{H NMR}$  ( $\text{CDCl}_3$ , 300 MHz)  $\delta$  7.31-7.27 (m, 2H), 6.97-6.90 (m, 4H), 4.69-4.64 (m, 2H), 3.81 (s, 3H), 3.28-3.11 (m, 2H), 2.29 (s, 3H), 2.21 (s, 6H);  $^{13}\text{C NMR}$  ( $\text{CDCl}_3$ , 125 MHz)  $\delta$  196.0, 160.1, 142.4, 140.6, 129.4, 128.2, 122.5, 114.5, 114.3, 56.6, 55.4, 48.2, 21.5, 21.2; IR (ATR) 2219, 1711, 1611, 1561, 1358, 1219, 1030, 828, 731, 620  $\text{cm}^{-1}$ ; HRMS (ESI)  $m/z$ :  $[\text{M}+\text{Na}]^+$  Calcd. for  $\text{C}_{20}\text{H}_{22}\text{N}_2\text{O}_2\text{NaS}$  377.1294; Found: 377.1305; HPLC (CHIRALPAK IE-3, Hexane/ $i$ PrOH = 90:10, 1.0 mL/min, 254 nm) 88% ee,  $t_{\text{R}}$  31.1 (major),  $t_{\text{R}}$  35.2 (minor) min.

### (*R*)-*S*-(2,4,6-Trimethylphenyl) 3-(2-naphthyl)-3-(cyanoamino)propanethioate (**13**)

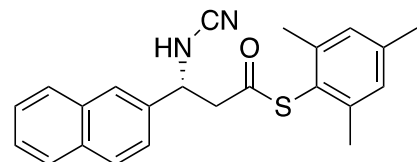

Reaction of **1o** (8.7 mg, 0.048 mmol), **2c** (9.6 mg, 0.04 mmol) and **3e** (2.5 mg, 0.004 mmol) in THF (1.0 mL) at 10 °C for 72 h. After removal of solvent, the residue was purified by silica gel column chromatography (eluent: Hexane/AcOEt, 70:30) gave **13** (12.0 mg, 80%, 90% ee) as a pale yellow amorphous solid.

$[\alpha]_{\text{D}}^{25} -23.6$  (90% ee,  $c$  0.58,  $\text{CHCl}_3$ );  $^1\text{H NMR}$  ( $\text{CDCl}_3$ , 300 MHz)  $\delta$  7.91-7.81 (m, 4H), 7.54-7.45 (m, 3H), 6.95 (s, 2H), 4.90-4.85 (m, 2H), 3.35 (dd, 1H,  $J$  = 4.6, 15.9 Hz), 3.24 (dd, 1H,  $J$  = 4.6, 15.9 Hz), 2.28 (s, 3H), 2.15 (s, 6H);  $^{13}\text{C NMR}$  ( $\text{CDCl}_3$ , 125 MHz)  $\delta$  195.8, 142.3, 140.5, 134.9, 133.4, 133.1, 129.3, 129.2, 128.1, 127.7, 126.7, 126.7, 126.3, 123.8, 122.4, 114.2, 57.3, 47.9, 21.3, 21.1; IR (ATR) 2922, 2219, 1710, 1601, 1435, 1360, 1219, 1089, 907  $\text{cm}^{-1}$ ; HRMS (ESI)  $m/z$ :  $[\text{M}+\text{Na}]^+$  Calcd. for  $\text{C}_{23}\text{H}_{22}\text{N}_2\text{ONaS}$  397.1345; Found: 397.1348; HPLC (CHIRALPAK IE-3, Hexane/ $i$ PrOH = 90:10, 1.0 mL/min, 254 nm) 90% ee,  $t_{\text{R}}$  26.7 (major),  $t_{\text{R}}$  30.9 (minor) min.



**(R)-S-(2,4,6-Trimethylphenyl) 3-(2-furyl)-3-(cyanoamino)propanethioate (14)**

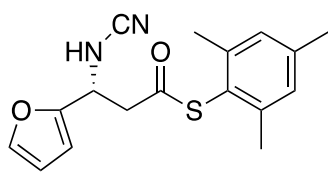

Reaction of **1p** (5.8 mg, 0.048 mmol), **2c** (9.6 mg, 0.04 mmol) and **3e** (2.5 mg, 0.004 mmol) in THF (1.0 mL) at 10 °C for 48 h. After removal of solvent, the residue was purified by silica gel column chromatography (eluent: Hexane/AcOEt, 70:30) gave **14** (11.6 mg, 92%, 87% ee) as a pale yellow oil.

$[\alpha]_{\text{D}}^{25} +18.6$  (87% ee,  $c$  0.58,  $\text{CHCl}_3$ );  $^1\text{H NMR}$  ( $\text{CDCl}_3$ , 300 MHz)  $\delta$  7.43-7.42 (m, 1H), 6.98 (s, 2H), 6.40-6.36 (m, 2H), 4.79-4.73 (m, 1H), 4.67 (br, 1H), 3.41-3.20 (m, 2H), 2.29 (s, 3H), 2.26 (s, 6H);  $^{13}\text{C NMR}$  ( $\text{CDCl}_3$ , 125 MHz)  $\delta$  195.2, 150.2, 143.2, 142.4, 140.6, 129.4, 122.4, 113.7, 110.7, 108.6, 50.9, 45.1, 21.5, 21.1; IR (ATR) 2219, 1710, 1438, 1419, 1283, 1220, 1143, 1017, 855, 740  $\text{cm}^{-1}$ ; HRMS (ESI)  $m/z$ :  $[\text{M}+\text{Na}]^+$  Calcd. for  $\text{C}_{17}\text{H}_{18}\text{N}_2\text{O}_2\text{NaS}$  337.0981; Found: 337.0985; HPLC (CHIRALPAK ID, Hexane/ $i$ PrOH = 90:10, 0.75 mL/min, 254 nm) 87% ee,  $t_R$  32.3 (major),  $t_R$  38.4 (minor) min.

**(R)-S-(2,4,6-Trimethylphenyl) 3-(2-thienyl)-3-(cyanoamino)propanethioate (15)**

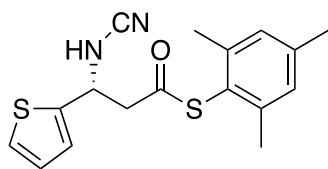

Reaction of **1q** (6.5 mg, 0.048 mmol), **2c** (9.6 mg, 0.04 mmol) and **3e** (2.5 mg, 0.004 mmol) in THF (1.0 mL) at 10 °C for 48 h. After removal of solvent, the residue was purified by silica gel column chromatography (eluent: Hexane/AcOEt, 70:30) gave **15** (12.6 mg, 95%, 86% ee) as a pale yellow oil.

$[\alpha]_{\text{D}}^{25} -79.1$  (86% ee,  $c$  0.58,  $\text{CHCl}_3$ );  $^1\text{H NMR}$  ( $\text{CDCl}_3$ , 300 MHz)  $\delta$  7.35-7.32 (m, 1H), 7.22-7.10 (m, 1H), 7.02-6.98 (m, 3H), 5.00-4.94 (m, 1H), 4.79 (br, 1H), 3.37 (dd,  $J = 5.0, 16.1$  Hz, 1H), 3.25 (dd,  $J = 5.0, 16.1$  Hz, 1H), 2.29 (s, 3H), 2.24 (s, 6H);  $^{13}\text{C NMR}$  ( $\text{CDCl}_3$ , 125 MHz)  $\delta$  195.4, 142.4, 140.6, 140.5, 129.4, 127.1, 126.4, 126.3, 122.3, 113.6, 52.9, 48.1, 21.4, 21.1; IR (ATR) 3196, 2222, 1711, 1673, 1219, 1083, 1040, 1015, 853, 670  $\text{cm}^{-1}$ ; HRMS (ESI)  $m/z$ :  $[\text{M}+\text{Na}]^+$  Calcd. for  $\text{C}_{17}\text{H}_{18}\text{N}_2\text{ONaS}$  353.0753; Found: 353.1754; HPLC (CHIRALPAK ID, Hexane/ $i$ PrOH = 90:10, 0.75 mL/min, 254 nm) 86% ee,  $t_R$  35.6 (minor),  $t_R$  38.2 (major) min.

## General procedure for synthetic application of products:

### (*R*)-2-(2,4,6-Trimethylphenyl)thio-4-oxo-6-phenyl-5,6-dihydropyrimidone (16)

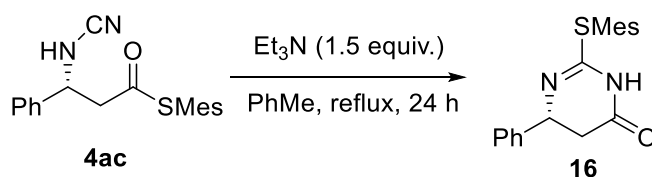

A solution of **4ac** (16.2 mg, 0.05 mmol, 1.0 equiv.) and Et<sub>3</sub>N (10.4 μL, 0.075 mmol, 1.5 equiv.) in toluene was stirred for 24 h under reflux in an oil bath and removal of solvent under reduced pressure gave a residue, which was purified by column chromatography (Hexane/AcOEt= 70/30) to afford **16** (12.7 mg, 78%, 94% ee) as a off white solid.

$[\alpha]_{\text{D}}^{25}$  +40.1 (94% ee, *c* 0.58, CHCl<sub>3</sub>); <sup>1</sup>H NMR (CDCl<sub>3</sub>, 300 MHz) δ 7.35-7.24 (m, 5H), 7.12 (s, 1H), 7.01 (s, 2H), 4.86-4.80 (m, 1H), 2.76 (dd, 1H, *J* = 5.4, 16.7 Hz), 2.55-2.45 (m, 7H), 2.30 (s, 3H); <sup>13</sup>C NMR (CDCl<sub>3</sub>, 125 MHz) δ 168.7, 144.1, 130.1, 129.4, 129.1, 128.7, 127.5, 126.8, 126.4, 59.3, 57.1, 37.6, 22.1, 21.2; IR (ATR) 2922, 2360, 2342, 1702, 1619, 1453, 1321, 1024, 945, 758 cm<sup>-1</sup>; HRMS (ESI) *m/z*: [M+Na]<sup>+</sup> Calcd. for C<sub>12</sub>H<sub>14</sub>N<sub>2</sub>ONa 347.1189; Found: 347.1187; HPLC (CHIRALPAK IE-3, Hexane/<sup>i</sup>PrOH = 90:10, 0.75 mL/min, 254 nm) 94% ee, *t<sub>R</sub>* 36.8 (major), *t<sub>R</sub>* 45.8 (minor) min.

### (*R*)-Methyl 3-phenyl-3-(cyanoamino)propanoate (17)

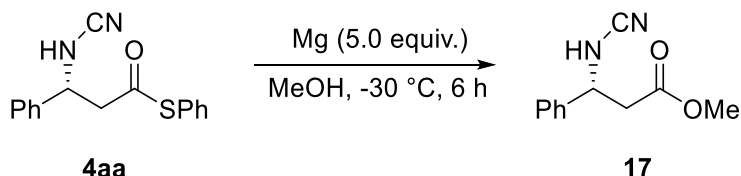

A solution of **4aa** (28.2 mg, 0.1 mmol, 1.0 equiv.) in MeOH was added to solution of Mg (12.0 mg, 0.5 mmol, 5.0 equiv.) in MeOH at -30 °C. The suspension was stirred for 6 h in argon atmosphere which was directly purified by column chromatography (Hexane/AcOEt= 60/40) to afford **17** (17.6 mg, 86%, 93% ee) as a colorless oil.

$[\alpha]_{\text{D}}^{25}$  -9.5 (93% ee, *c* 0.58, CHCl<sub>3</sub>); <sup>1</sup>H NMR (CDCl<sub>3</sub>, 300 MHz) δ 7.43-7.31 (m, 5H), 4.83 (br, 1H), 4.70-4.65 (m, 1H), 3.72 (s, 3H), 2.94 (dd, 1H, *J* = 7.8, 16.6 Hz), 2.83 (dd, 1H, *J* = 7.8, 16.6 Hz); <sup>13</sup>C NMR (CDCl<sub>3</sub>, 125 MHz) δ 171.5, 137.9, 129.2, 129.0, 126.8, 114.5, 58.5, 52.3, 39.9; IR (ATR) 2352, 2218, 1731, 1554, 1495, 1265, 1201, 988, 762 cm<sup>-1</sup>; HRMS (ESI) *m/z*: [M+Na]<sup>+</sup> Calcd. for C<sub>11</sub>H<sub>12</sub>N<sub>2</sub>O<sub>2</sub>Na 227.0791; Found: 227.0798; HPLC (CHIRALPAK AD-3, Hexane/<sup>i</sup>PrOH = 90:10, 1.0 mL/min, 254 nm) 93% ee, *t<sub>s</sub>* 8.6 (minor), *t<sub>R</sub>* 11.1 (major) min.

**(R)-2-(2,4,6-Trimethylphenyl)thio-3-phenyl-3-(2H-tetrazole-5-amino)propanoate (18)**

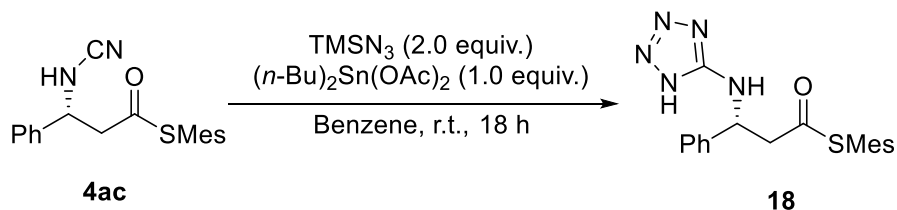

To solution of **4ac** (32.4 mg, 0.1 mmol, 1.0 equiv.) in benzene, TMSN<sub>3</sub> (26 μL, 0.2 mmol, 2.0 equiv.) and (n-Bu)<sub>2</sub>Sn(OAc)<sub>2</sub> (27 μL, 0.1 mmol, 1.0 equiv.) were added at room temperature. The solution was stirred for 18 h in argon atmosphere. After white solid precipitated, which was filtered. Filter cake was dried under vacuum to afford **18** (32.2 mg, 96%, 95% ee) as a white solid.

mp = 192.2-193.0 °C; [α]<sub>D</sub><sup>25</sup> +108.4 (95% ee, *c* 0.58, CHCl<sub>3</sub>); <sup>1</sup>H NMR ((CD<sub>3</sub>)<sub>2</sub>SO, 300 MHz) δ 7.35 (s, 5H), 6.97 (s, 2H), 6.86 (br, 2H), 5.96-5.91 (m, 1H), 3.37 (dd, 1H, *J* = 7.7, 16.2 Hz), 3.25 (dd, 1H, *J* = 7.7, 16.2 Hz), 2.21 (s, 3H), 2.04 (s, 6H); <sup>13</sup>C NMR ((CD<sub>3</sub>)<sub>2</sub>SO, 125 MHz) δ 193.6, 155.5, 142.5, 140.1, 138.0, 129.4, 129.2, 128.8, 127.4, 123.4, 55.2, 48.0, 21.4, 21.1; IR (ATR) 3319, 3158, 1738, 1688, 1580, 1495, 1428, 1354, 1215, 1051, 618 cm<sup>-1</sup>; HRMS (ESI) *m/z*: [M+Na]<sup>+</sup> Calcd. for C<sub>19</sub>H<sub>21</sub>N<sub>5</sub>OSNa 390.1359; Found: 390.1356; HPLC (CHIRALPAK IE-3, Hexane/*i*PrOH = 80:20, 1.0 mL/min, 254 nm) 95% ee, *t<sub>s</sub>* 16.2 (minor), *t<sub>R</sub>* 18.8 (major) min.

**Large scale experiment procedure:**

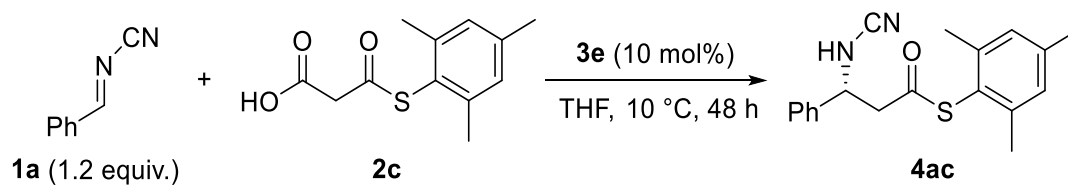

*N*-Cyano imine **1a** (312.4 mg, 2.4 mmol), **2c** (476.6 mg, 2.0 mmol), and **3e** (126. mg, 0.2 mmol) in THF was stirred for 48 h at 10 °C. After removal solvent, the residue was purified by silica gel column chromatography (eluent: Hexane/AcOEt, 70:30) to afford (*R*)-**4ac** (590.4mg, 91%, 92% ee) as a yellow oil.

## ESI-Mass spectroscopic analysis:

To clarify the assumed reaction mechanism, we also investigated some other spectroscopic analysis. The ESI-Mass spectroscopic analysis of intermediate **A** (**3e** and malonic acid half thioester **2c** in a 1:1 ratio in MeOH, anion mode).

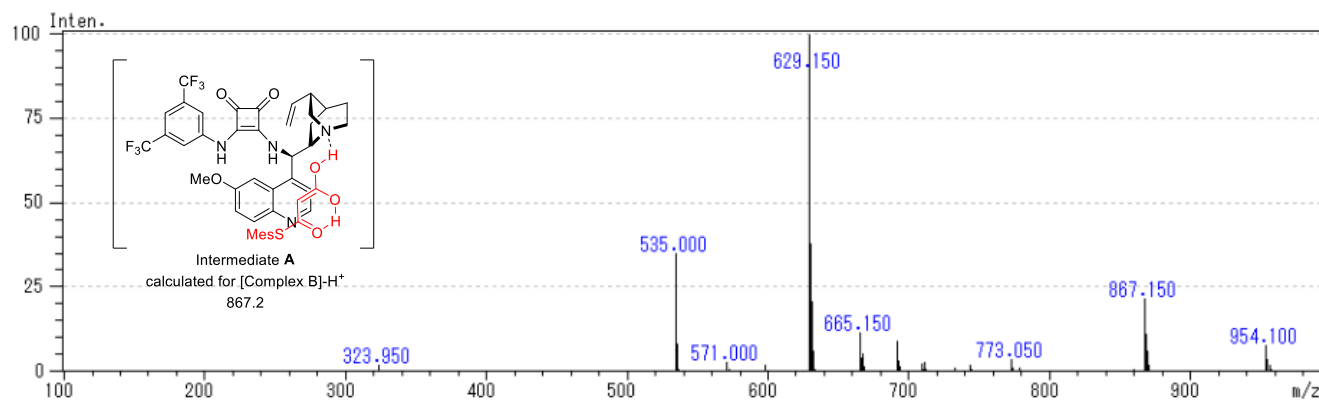

(a) Peaks for intermediate **A**

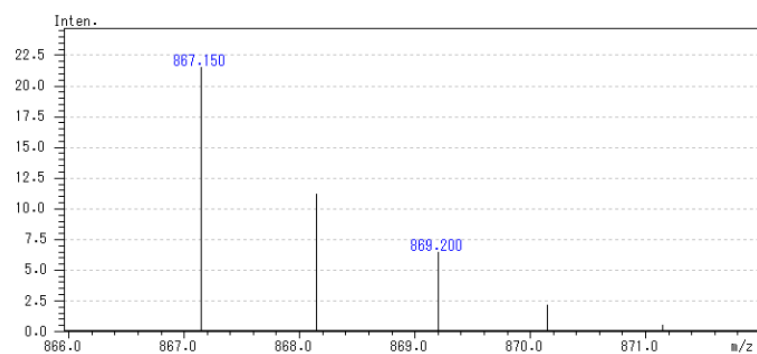

(b) Theoretical peaks for intermediate **A**

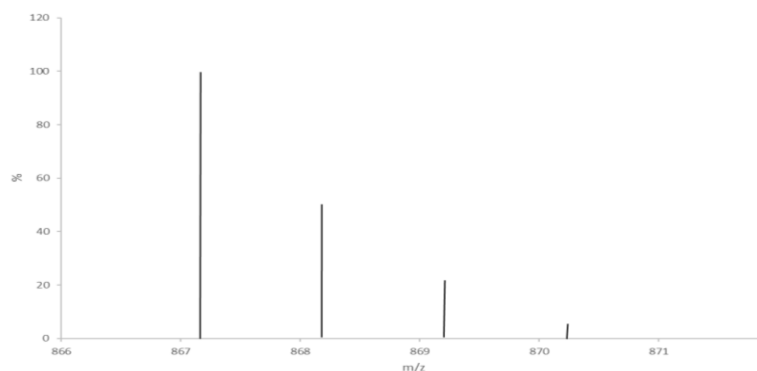

The ESI-Mass spectroscopic analysis of intermediate **C** (**3e**, *N*-cyano imine **1a** and malonic acid half thioester **2c** in 1:1:1 ratio in MeOH, anion mode);

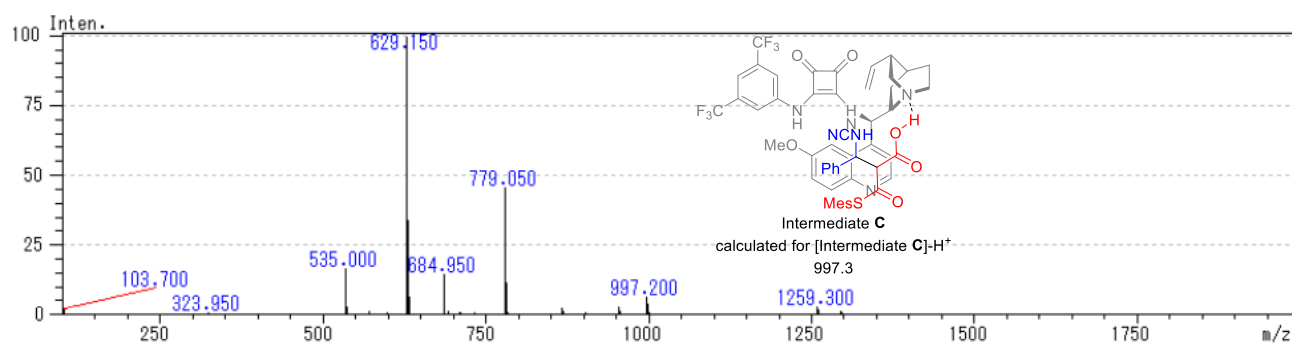

(a) Peaks for intermediate C

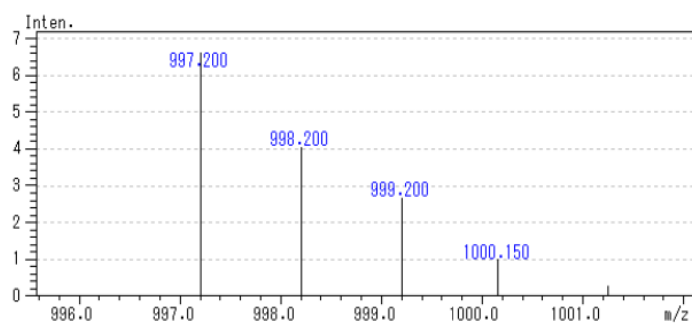

(b) Theoretical peaks for intermediate C

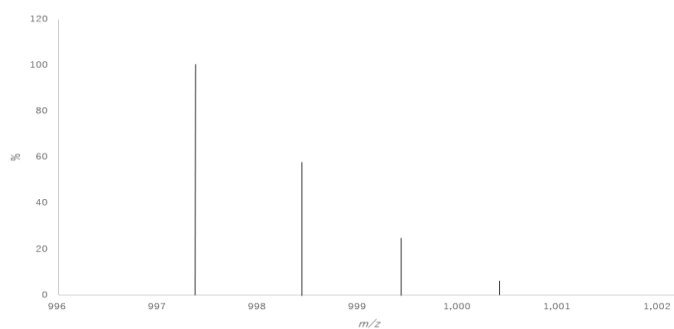

## MO Calculations:

The calculation was performed using Gaussian 16 revision C.01. Geometry optimizations were performed using B3LYP functional with 6-31G(d,p) basis set. After optimization of structures, frequency calculations were performed at the same level of the theory to confirm that the obtained structures were a transition state (one imaginary frequency). Single point energy calculations for the optimized geometry were performed using M06-2X functional with 6-311G+(d,p) basis set for all the atoms in SMD solvation model (THF).

The calculation results for TS-*R* and TS-*S* were shown in Figure S2. The relative energies of the optimized structures were depicted. As a result, the TS-*R* was most stable complex. Figure S3 showed the energy diagram for the complexes.

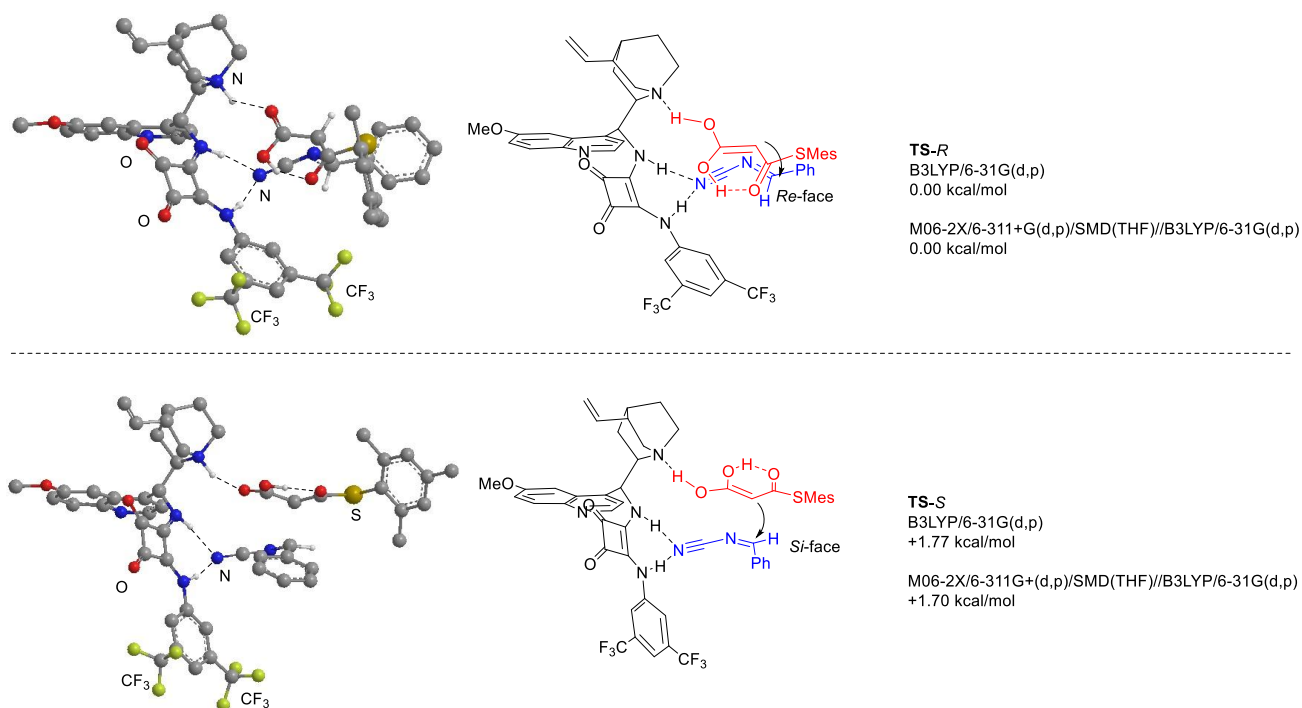

**Figure S2.** MO calculation for transition state of **1a** and **2c** using **3e** by Gaussian 16 B3LYP/6-31G(d,p) and M06-2X/6-311+G(d,p)/CPCM(THF)//B3LYP/6-31G(d,p). H atoms have been omitted for clarity.

## Calculated Transition states

### TS-*R*

B3LYP/6-31G(d,p) free energy: -3787.56295047 (a.u.)

Number of imaginary frequencies: 1 (-256.9878)

M06-2X/6-311+G(d,p)/SMD(THF) single point energy: -3787.21792477 (a.u.)

|   |             |             |             |
|---|-------------|-------------|-------------|
| C | 6.35706400  | 0.37610300  | -1.14356100 |
| C | 7.23799600  | 0.51484700  | -2.27251900 |
| N | 6.93051600  | 0.07824000  | -3.52703200 |
| C | 5.75575300  | -0.48815900 | -3.70347700 |
| C | 4.82002800  | -0.69959300 | -2.66320800 |
| C | 5.11051200  | -0.29230900 | -1.37716700 |
| C | 4.11120700  | -0.56210300 | -0.25072900 |
| C | 4.00179100  | -2.09025700 | -0.03154500 |
| C | 6.76404500  | 0.90526500  | 0.10571600  |
| C | 8.49337200  | 1.14528200  | -2.08650200 |
| H | 5.51489800  | -0.81351000 | -4.71409100 |
| H | 3.86859100  | -1.16647300 | -2.90461100 |
| H | 4.47880800  | -0.11484300 | 0.67107500  |
| C | 5.31146900  | -2.70065000 | 0.53802200  |
| N | 2.87052200  | -2.46498900 | 0.90932900  |
| H | 3.72813700  | -2.56238300 | -0.97913800 |
| C | 3.15610500  | -2.04926100 | 2.33029400  |
| C | 4.34236200  | -2.88632000 | 2.88962100  |
| C | 4.97965600  | -3.65930100 | 1.69678100  |
| C | 2.64386300  | -3.95912800 | 0.84743400  |
| C | 3.95675500  | -4.69395200 | 1.19318800  |
| H | 5.98034100  | -1.90587800 | 0.88006700  |
| H | 5.84329000  | -3.23444500 | -0.25417900 |
| H | 3.37045000  | -0.97832800 | 2.33453000  |
| H | 2.23314900  | -2.20464700 | 2.89226800  |
| H | 3.95000700  | -3.63943700 | 3.58349100  |
| H | 5.89004800  | -4.15842800 | 2.03908500  |
| H | 2.26666000  | -4.17623300 | -0.15221600 |
| H | 1.83460300  | -4.16753500 | 1.54783300  |
| H | 3.76915500  | -5.45486800 | 1.95659800  |
| C | 7.99690900  | 1.52195800  | 0.24819500  |
| C | 8.87641900  | 1.63585500  | -0.86003400 |
| H | 6.11380000  | 0.89921200  | 0.97367500  |
| H | 9.13937200  | 1.23184200  | -2.95361700 |
| H | 9.84128200  | 2.11603600  | -0.75113200 |
| H | 4.35048100  | -5.21188200 | 0.31288800  |
| N | 2.80899600  | 0.04649800  | -0.50083500 |
| C | -2.05560900 | -1.82961300 | -2.11982700 |
| C | 0.07293500  | -1.07492100 | -2.59145100 |
| N | 0.93774800  | -0.26304100 | -2.63802800 |
| C | -3.09574400 | -2.76408800 | -2.62925200 |
| C | -4.38358900 | -2.28689000 | -2.90168100 |
| C | -2.78978700 | -4.10578000 | -2.90247700 |
| C | -5.35446100 | -3.13887300 | -3.43129500 |
| H | -4.61534200 | -1.24053700 | -2.72756300 |
| C | -3.76279100 | -4.95647500 | -3.41812800 |
| H | -1.78069300 | -4.46105800 | -2.71986000 |
| C | -5.04931300 | -4.47579300 | -3.68295600 |
| H | -6.34630700 | -2.75472500 | -3.65050600 |
| H | -3.51863700 | -5.99487800 | -3.62336600 |
| H | -5.80555900 | -5.14025000 | -4.09065400 |
| N | -0.81063600 | -2.01575900 | -2.62878300 |
| H | -2.41304100 | -0.80674400 | -1.96932600 |



|   |             |             |             |
|---|-------------|-------------|-------------|
| H | 1.95154600  | -2.05153900 | 0.59484200  |
| S | -4.62627100 | -2.70989800 | 0.75173000  |
| C | -5.71926400 | -1.70810700 | 1.77153200  |
| C | -6.48493800 | -0.67017100 | 1.20283900  |
| C | -5.83914500 | -2.03481100 | 3.13894000  |
| C | -7.36231400 | 0.03546100  | 2.03275600  |
| C | -6.73633500 | -1.30063200 | 3.92071800  |
| C | -7.50175500 | -0.25915200 | 3.39065400  |
| H | -7.95445300 | 0.83823400  | 1.59990800  |
| H | -6.83429200 | -1.54902200 | 4.97485200  |
| C | -3.19849600 | -1.63292200 | 0.52944700  |
| C | -2.03377600 | -2.25915600 | -0.08865300 |
| H | -2.03869700 | -3.34128000 | -0.14868600 |
| O | -3.22532700 | -0.44183500 | 0.87279600  |
| C | -0.72878200 | -1.72226200 | 0.31625000  |
| O | 0.31052300  | -2.38842800 | 0.21072200  |
| O | -0.66509000 | -0.46071600 | 0.74293000  |
| H | -1.60556400 | -0.13102100 | 0.83500700  |
| H | 2.29374800  | -0.15640300 | -1.37230100 |
| C | 5.31410900  | -2.02334900 | 3.65412000  |
| H | 5.67994400  | -1.13007400 | 3.14924400  |
| C | 5.72682000  | -2.28344500 | 4.89408100  |
| H | 5.37058600  | -3.14934100 | 5.44762200  |
| H | 6.43223600  | -1.63590100 | 5.40467500  |
| C | 2.41447400  | 1.11723600  | 0.21158300  |
| C | 1.35878900  | 2.03233100  | 0.09064700  |
| C | 2.87693600  | 1.70041700  | 1.47806100  |
| C | 1.75393500  | 2.73752600  | 1.35072500  |
| O | 3.75764900  | 1.40468700  | 2.27929300  |
| O | 1.35388200  | 3.68678200  | 1.99347000  |
| N | 0.41656700  | 2.10872600  | -0.87364100 |
| H | 0.50460600  | 1.39171000  | -1.60230700 |
| C | -0.79647400 | 2.80700000  | -0.86948000 |
| C | -1.72715100 | 2.46578100  | -1.86123100 |
| C | -1.11699800 | 3.79932200  | 0.07009900  |
| C | -2.97717000 | 3.07827700  | -1.88802000 |
| H | -1.47199400 | 1.71623300  | -2.60357900 |
| C | -2.36674400 | 4.41370600  | 0.00732900  |
| H | -0.40237200 | 4.08471400  | 0.83695500  |
| C | -3.31226600 | 4.05932800  | -0.95718700 |
| H | -4.28000200 | 4.54218800  | -0.98618100 |
| C | -3.98262600 | 2.60007200  | -2.89885000 |
| C | -2.72898900 | 5.44092500  | 1.05111400  |
| F | -4.47547000 | 1.37529000  | -2.55397500 |
| F | -3.43902200 | 2.45663400  | -4.12584900 |
| F | -5.03851300 | 3.42861200  | -3.01063100 |
| F | -3.24982100 | 4.86073400  | 2.15597800  |
| F | -1.65836900 | 6.15799900  | 1.44585300  |
| F | -3.65662900 | 6.31235300  | 0.59104400  |

|   |             |             |             |
|---|-------------|-------------|-------------|
| O | 8.28551100  | 1.99444000  | 1.49212500  |
| C | 9.49507500  | 2.71301000  | 1.69291600  |
| H | 9.54766400  | 3.60410600  | 1.05568400  |
| H | 9.48612300  | 3.02163300  | 2.73880400  |
| H | 10.37661500 | 2.08535700  | 1.51142200  |
| C | -5.03393700 | -3.13905600 | 3.78410300  |
| H | -5.23108100 | -4.11225000 | 3.32306100  |
| H | -3.95852700 | -2.95733900 | 3.68898100  |
| H | -5.27299100 | -3.21388500 | 4.84807300  |
| C | -6.37990300 | -0.29143300 | -0.25230700 |
| H | -5.41430300 | 0.17746400  | -0.46337800 |
| H | -6.46675600 | -1.16742100 | -0.90189300 |
| H | -7.16495400 | 0.41872800  | -0.52434700 |
| C | -8.43456200 | 0.54242600  | 4.26622400  |
| H | -7.92510000 | 1.42079800  | 4.68158000  |
| H | -9.29912900 | 0.90588000  | 3.70287000  |
| H | -8.80153600 | -0.04997800 | 5.10950000  |

**TS-S**

B3LYP/6-31G(d,p) free energy: -3787.56012352 (a.u.)

Number of imaginary frequencies: 1 (-267.9050)

M06-2X/6-311+G(d,p)/SMD(THF) single point energy: -3787.21522261 (a.u.)

|   |             |             |             |
|---|-------------|-------------|-------------|
| C | -5.15142000 | -2.27623500 | 1.64322100  |
| C | -5.84502600 | -2.32262500 | 2.90319900  |
| N | -5.21764900 | -2.26782900 | 4.11232400  |
| C | -3.90642400 | -2.15570400 | 4.11332400  |
| C | -3.11957500 | -2.12412400 | 2.93794100  |
| C | -3.72079500 | -2.19887400 | 1.69792700  |
| C | -2.85520900 | -2.18705200 | 0.43622200  |
| C | -1.99740900 | -3.47921500 | 0.41142100  |
| C | -5.91120400 | -2.30361300 | 0.44838200  |
| C | -7.25851600 | -2.42271400 | 2.90236400  |
| H | -3.41976100 | -2.09342100 | 5.08509200  |
| H | -2.04207200 | -2.01973300 | 3.03504700  |
| H | -3.49773600 | -2.21295200 | -0.44103400 |
| C | -2.85866000 | -4.72594600 | 0.06255200  |
| N | -0.85479700 | -3.41505200 | -0.58441200 |
| H | -1.49759100 | -3.59804800 | 1.37549900  |
| C | -1.33980800 | -3.36740100 | -2.00888300 |
| C | -2.03674000 | -4.71424400 | -2.36210700 |
| C | -2.17182300 | -5.54260200 | -1.04857400 |
| C | 0.05180500  | -4.61037500 | -0.38982600 |
| C | -0.75620800 | -5.91264200 | -0.57286000 |
| H | -3.85779900 | -4.41712100 | -0.25684900 |
| H | -2.99382800 | -5.34560900 | 0.95340000  |
| H | -2.02504500 | -2.52473500 | -2.10749700 |
| H | -0.46522400 | -3.16924300 | -2.63177200 |
| H | -1.38072600 | -5.28988600 | -3.02612600 |
| H | -2.75242000 | -6.44515700 | -1.25674400 |
| H | 0.49157300  | -4.50273800 | 0.60126000  |
| H | 0.85412700  | -4.49615200 | -1.12132900 |
| H | -0.26215600 | -6.56275800 | -1.30101500 |
| C | -7.29345500 | -2.39558600 | 0.48662600  |
| C | -7.97552200 | -2.46333000 | 1.72947300  |
| H | -5.45216300 | -2.20668100 | -0.52910400 |
| H | -7.75441000 | -2.45981100 | 3.86641000  |
| H | -9.05579700 | -2.53614600 | 1.76251700  |
| H | -0.80823000 | -6.46558200 | 0.37026300  |
| N | -2.07599800 | -0.94783800 | 0.31182900  |
| C | 3.00622700  | 0.40270300  | 1.65878000  |
| C | 0.71431900  | 0.52545100  | 2.21861500  |
| N | -0.45894500 | 0.68098300  | 2.10823100  |
| N | 1.95310400  | 0.34306700  | 2.51191300  |
| H | -0.24707000 | -2.59303600 | -0.33191200 |
| S | 6.00038100  | -1.81785700 | 1.56705600  |
| C | 7.46754300  | -1.79573600 | 0.52838100  |
| C | 8.36809000  | -0.71718800 | 0.65162400  |

|   |             |             |             |
|---|-------------|-------------|-------------|
| C | 7.74876400  | -2.88339900 | -0.32449000 |
| C | 9.54379600  | -0.74483600 | -0.10471300 |
| C | 8.93578100  | -2.85499200 | -1.06334700 |
| C | 9.84353300  | -1.79744300 | -0.97286500 |
| H | 10.24254600 | 0.08307200  | -0.01207700 |
| H | 9.15718500  | -3.68967300 | -1.72423500 |
| C | 4.65055000  | -1.55190100 | 0.39704800  |
| C | 3.33660900  | -1.48240000 | 1.02473500  |
| H | 3.25694800  | -1.90705600 | 2.01936300  |
| O | 4.84921800  | -1.41585000 | -0.81673300 |
| C | 2.17747100  | -1.79278100 | 0.18163900  |
| O | 1.06751500  | -2.05882000 | 0.66499400  |
| O | 2.31433100  | -1.73855700 | -1.14628300 |
| H | 3.27341900  | -1.53201100 | -1.33936300 |
| H | -1.53673800 | -0.59787300 | 1.11731800  |
| C | -3.34061300 | -4.49010900 | -3.08844900 |
| H | -4.00316600 | -3.72553400 | -2.68657700 |
| C | -3.69821900 | -5.15232300 | -4.18831300 |
| H | -4.64930700 | -4.96672700 | -4.67685800 |
| H | -3.05278000 | -5.89932100 | -4.64557600 |
| C | -2.52646200 | -0.00713100 | -0.55224400 |
| C | -2.37874100 | 1.38803500  | -0.68262900 |
| N | -1.73186000 | 2.25949900  | 0.11239900  |
| H | -1.27602300 | 1.82747700  | 0.93644100  |
| C | -3.34007600 | -0.11214500 | -1.76845500 |
| C | -3.20078200 | 1.39872200  | -1.94122000 |
| O | -3.87119500 | -1.04486300 | -2.36593100 |
| O | -3.57644800 | 2.22749600  | -2.74462800 |
| C | -1.58059000 | 3.64822900  | -0.01390400 |
| C | -2.11893000 | 4.39611700  | -1.06995200 |
| C | -0.84970600 | 4.29570600  | 0.99626600  |
| C | -1.91568100 | 5.77678900  | -1.09735800 |
| H | -2.70002100 | 3.91447800  | -1.85080400 |
| C | -0.66250300 | 5.67267600  | 0.94592800  |
| H | -0.44145500 | 3.71929200  | 1.81935100  |
| C | -1.19240100 | 6.42918000  | -0.10075000 |
| H | -1.05847700 | 7.50289000  | -0.12915900 |
| C | 0.16754900  | 6.35309900  | 2.00298700  |
| C | -2.44929000 | 6.56576200  | -2.26638600 |
| F | -0.28388400 | 7.60044700  | 2.26395000  |
| F | 1.45838400  | 6.47780900  | 1.61621700  |
| F | 0.16801400  | 5.66827000  | 3.16634300  |
| F | -2.61903500 | 7.87109100  | -1.95590200 |
| F | -1.60065100 | 6.51967400  | -3.32033400 |
| F | -3.63634300 | 6.09213400  | -2.69523300 |
| C | 8.10825300  | 0.45633900  | 1.56643200  |
| H | 7.18443600  | 0.97556100  | 1.29265900  |
| H | 7.99942600  | 0.14667400  | 2.61069100  |
| H | 8.92964700  | 1.17497400  | 1.51100000  |
| C | 6.81801900  | -4.06175500 | -0.46852500 |

|   |             |             |             |
|---|-------------|-------------|-------------|
| H | 7.28694700  | -4.85275700 | -1.05920200 |
| H | 6.54082300  | -4.47746600 | 0.50525100  |
| H | 5.89364500  | -3.76306200 | -0.97285900 |
| C | 11.10298800 | -1.78207800 | -1.80508400 |
| H | 10.93108100 | -1.28624500 | -2.76855700 |
| H | 11.90978600 | -1.24167200 | -1.30139900 |
| H | 11.45374000 | -2.79578100 | -2.01970500 |
| O | -7.92202700 | -2.41372200 | -0.72098000 |
| C | -9.34256400 | -2.42798700 | -0.75832400 |
| H | -9.77010500 | -1.55137300 | -0.25664300 |
| H | -9.61135300 | -2.40147200 | -1.81485500 |
| H | -9.75263500 | -3.33988000 | -0.30634800 |
| C | 3.04797600  | 1.26593800  | 0.43567900  |
| C | 4.23389500  | 1.96300500  | 0.16019200  |
| C | 1.95496900  | 1.43223900  | -0.43029700 |
| C | 4.32792700  | 2.81183100  | -0.94125200 |
| H | 5.08245500  | 1.85273200  | 0.82962000  |
| C | 2.04975000  | 2.27970600  | -1.53244900 |
| H | 1.02976500  | 0.90064500  | -0.24497400 |
| C | 3.23397600  | 2.97288300  | -1.79143900 |
| H | 5.25239800  | 3.34861100  | -1.13175100 |
| H | 1.19436800  | 2.40153800  | -2.19007000 |
| H | 3.30105200  | 3.63539000  | -2.64912800 |
| H | 3.95348400  | 0.42144800  | 2.19699600  |

**Figure S3.** Energy diagram for intermediates and transition states by Gaussian 16 B3LYP/6-31G(d,p)

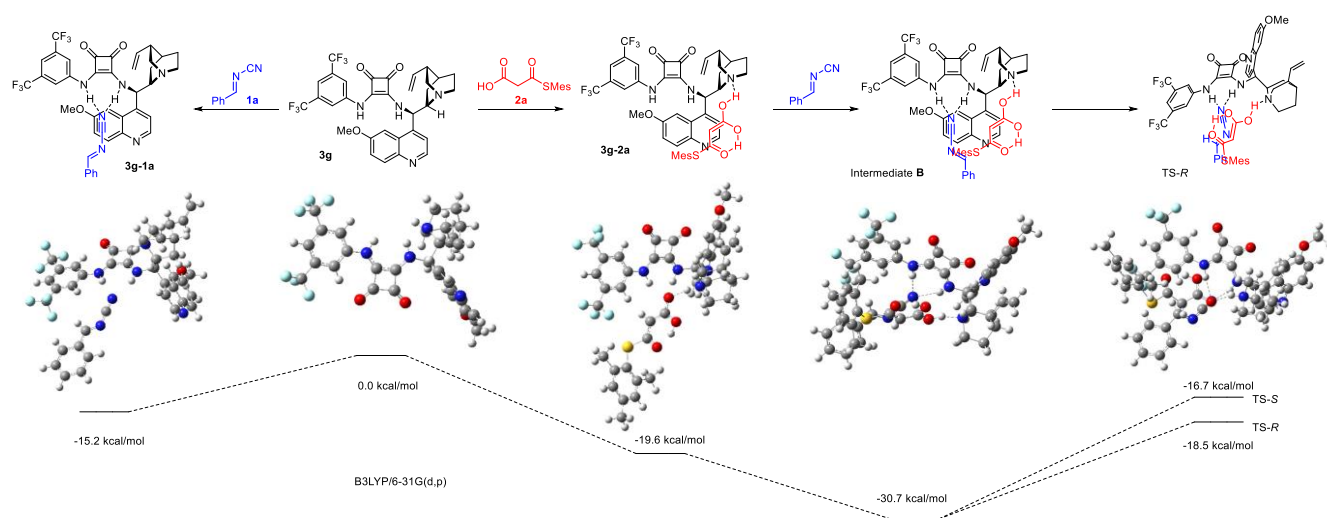

## References

1. A. Aumuller, S. Hunig, *Angew. Chem. Int. Ed. Engl.* **1984**, *23*, 447-448.
2. T. Imamoto, M. Kodera, M. Yokoyama, *Bull. Chem. Soc. Jpn.* **1982**, *55*, 2303-2304.

# $^1\text{H}$ , $^{13}\text{C}$ and $^{19}\text{F}$ NMR

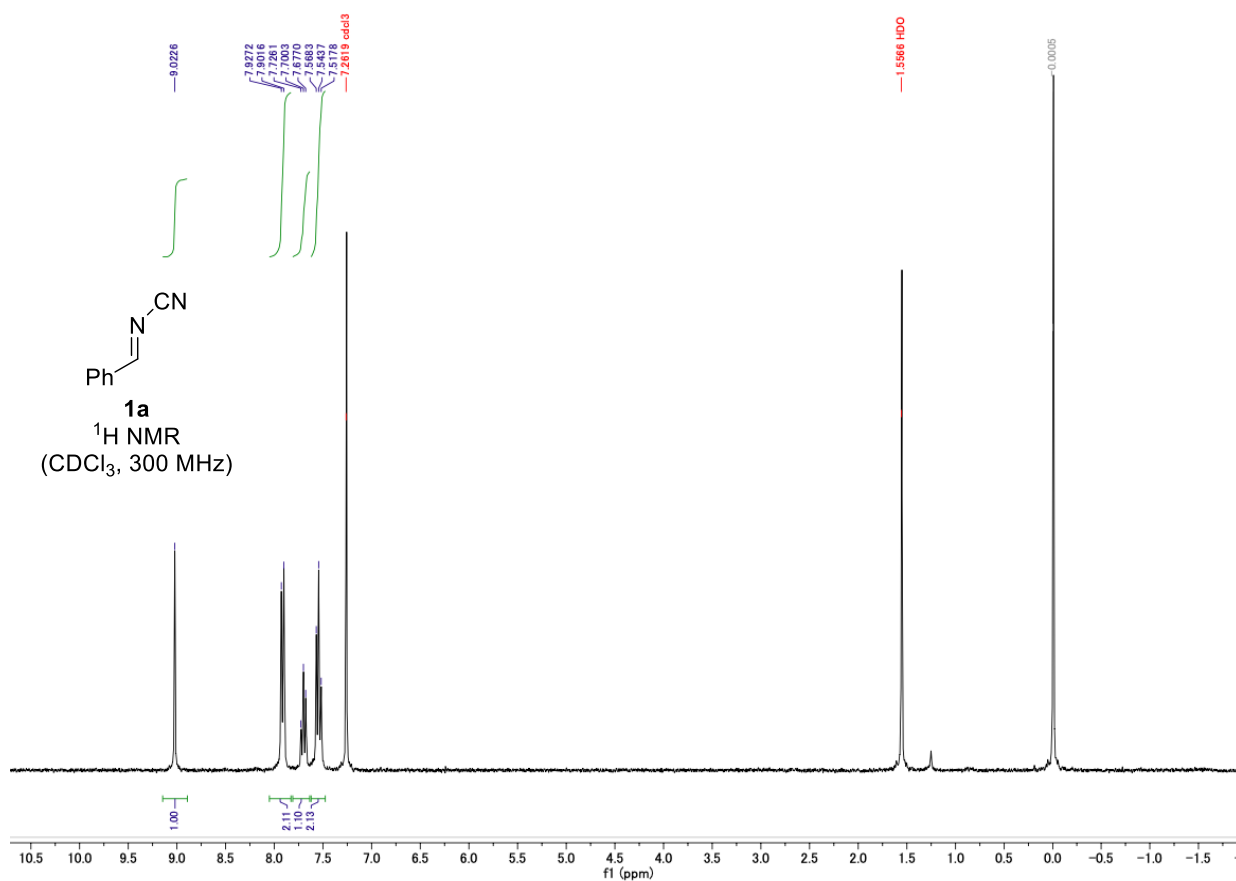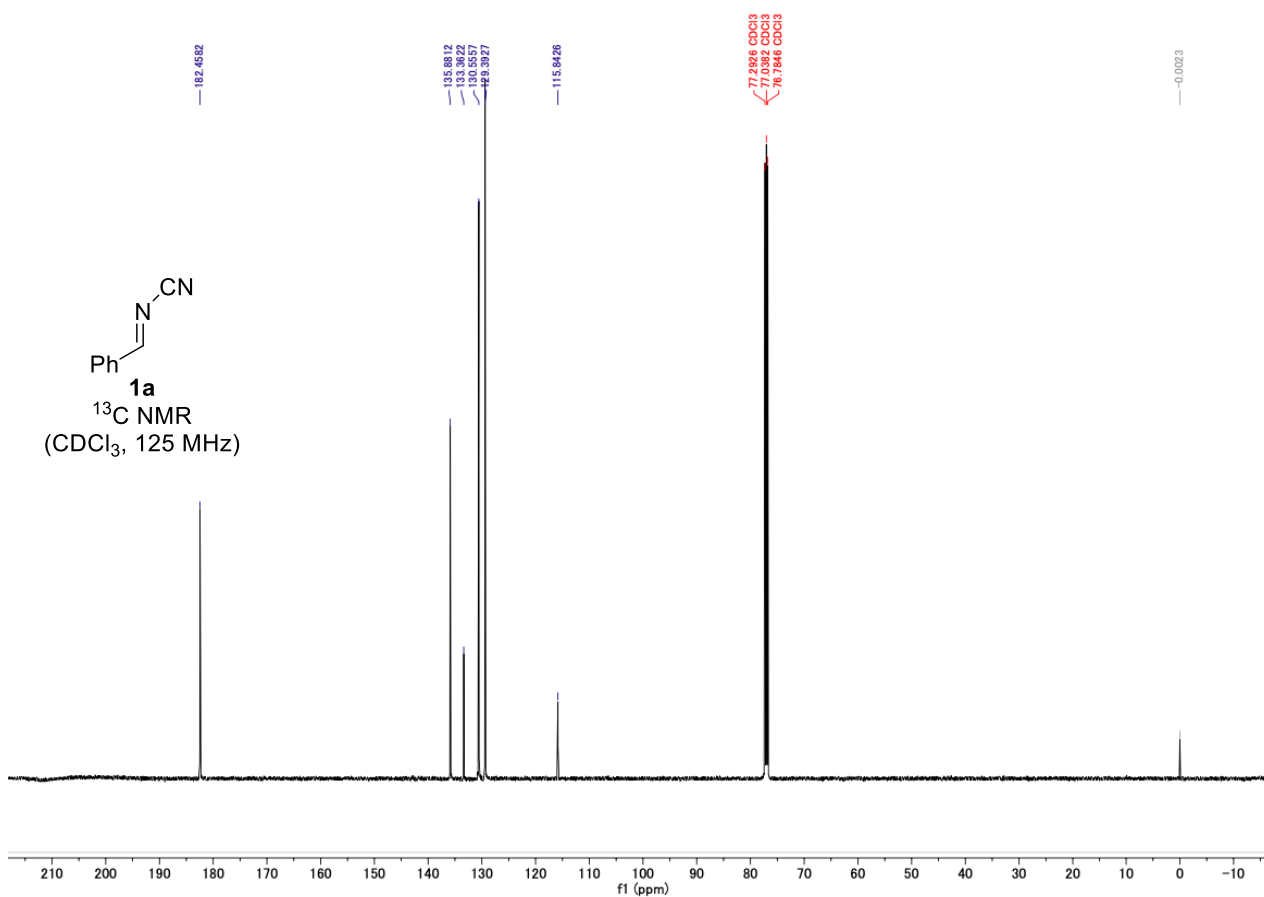



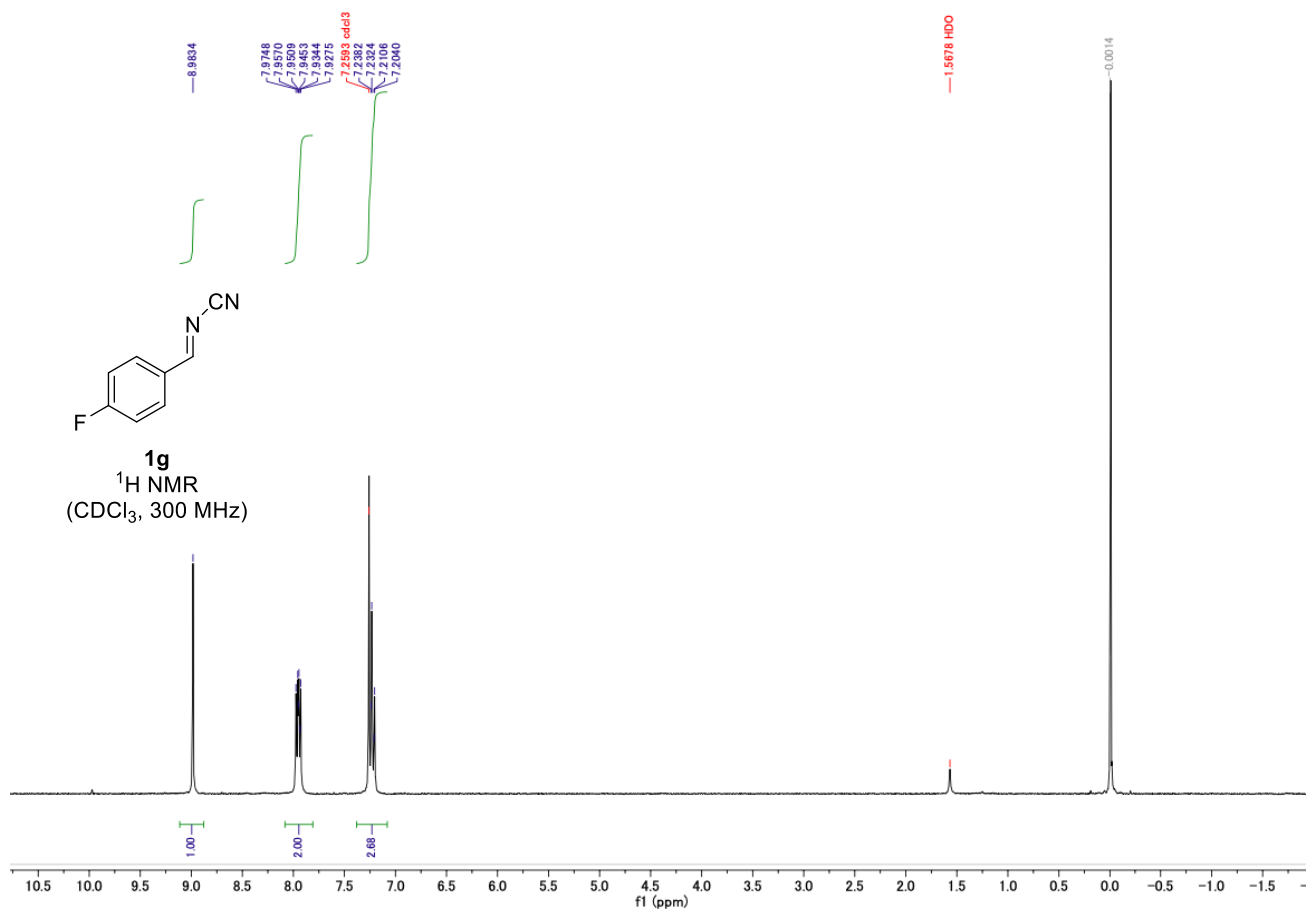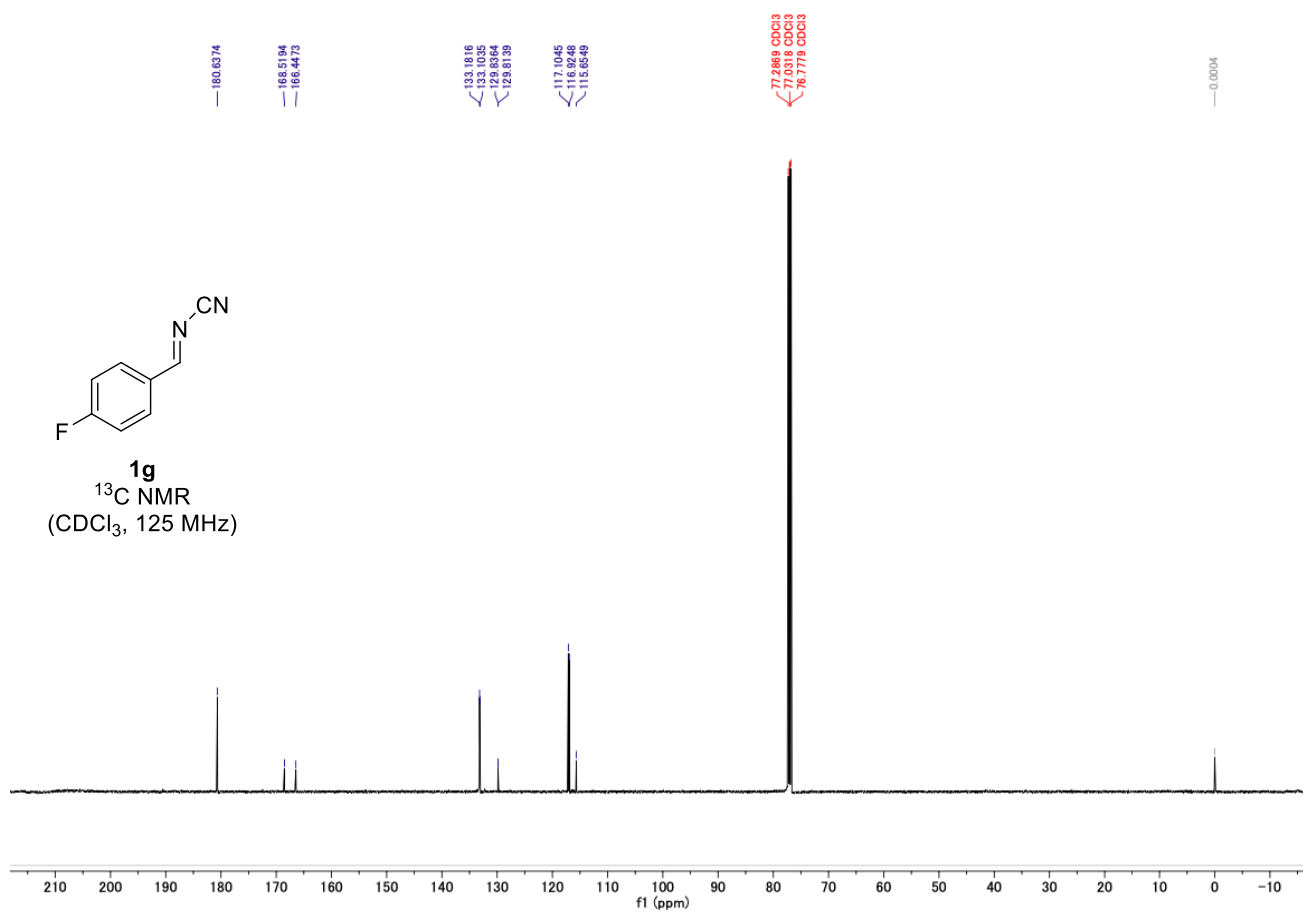

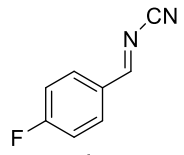

**1g**  
<sup>19</sup>F NMR  
(CDCl<sub>3</sub>, 282 MHz)

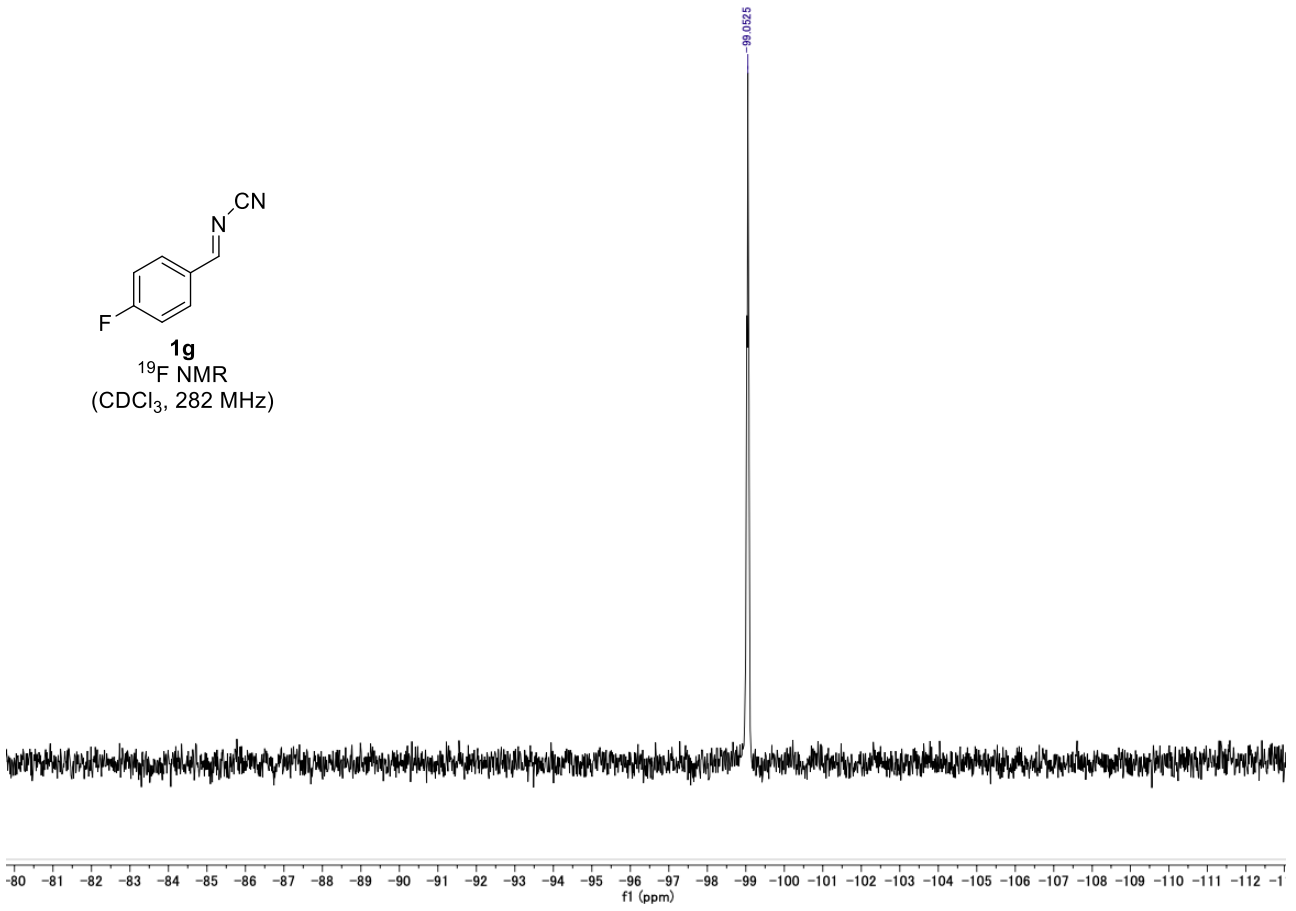

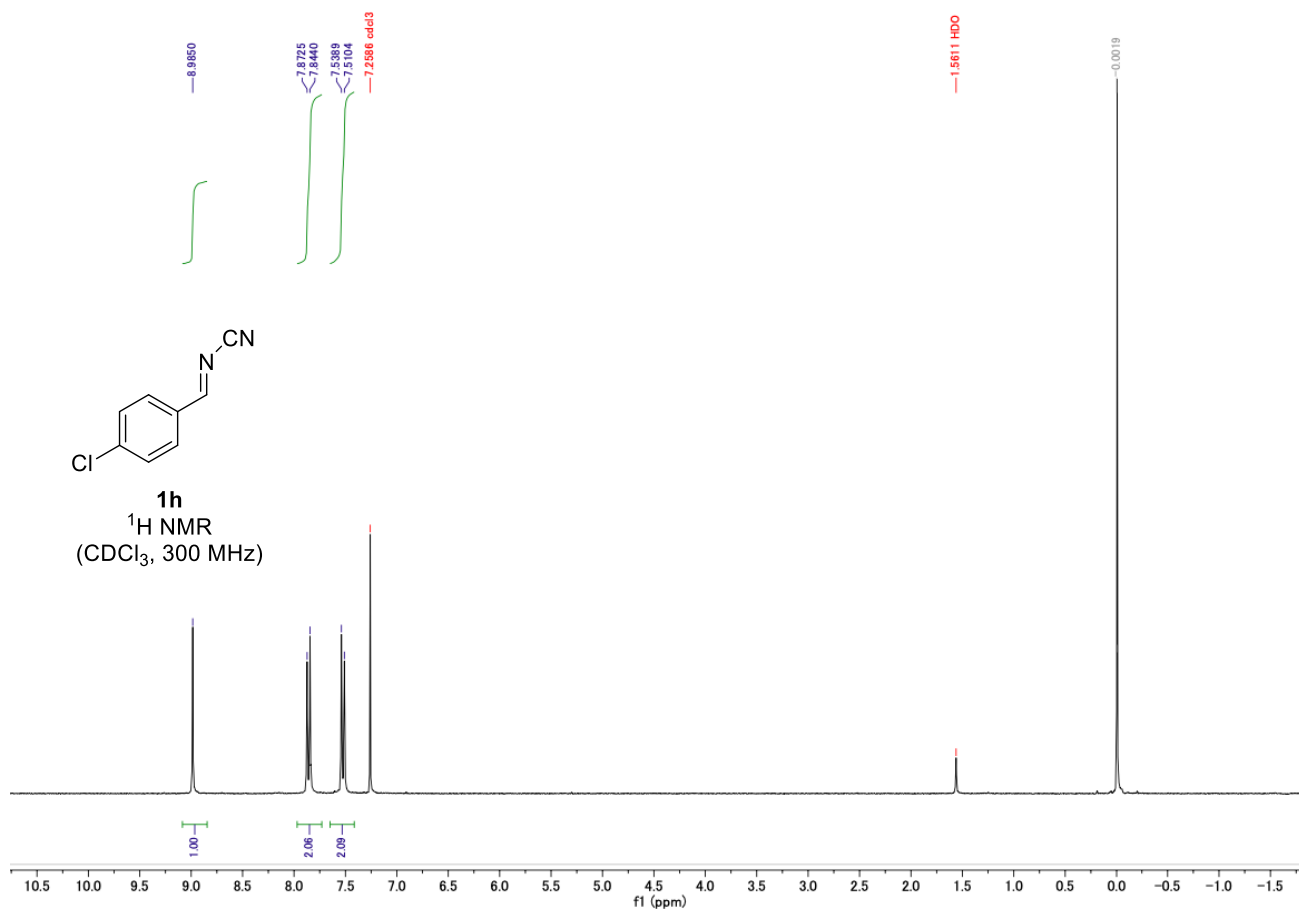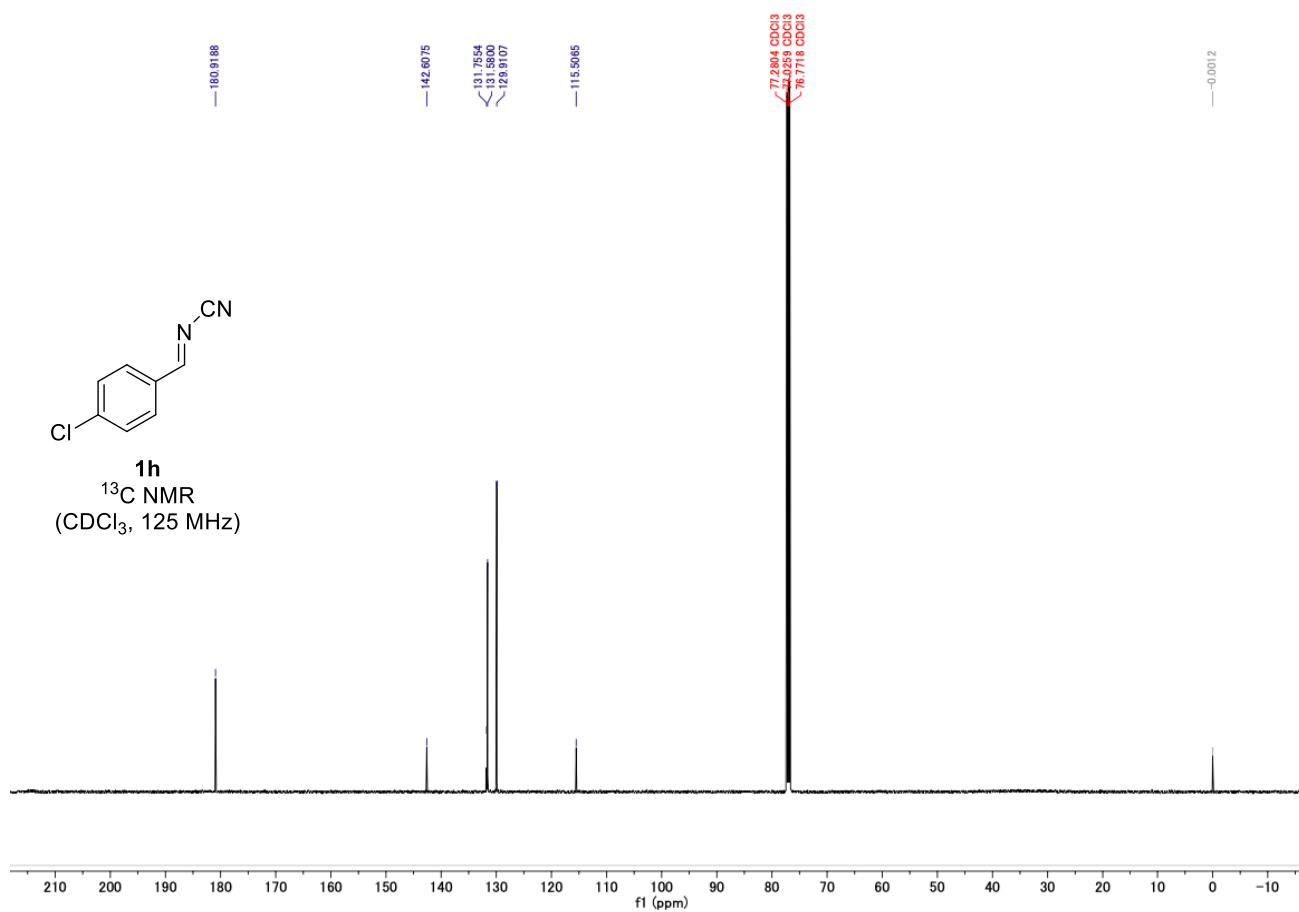



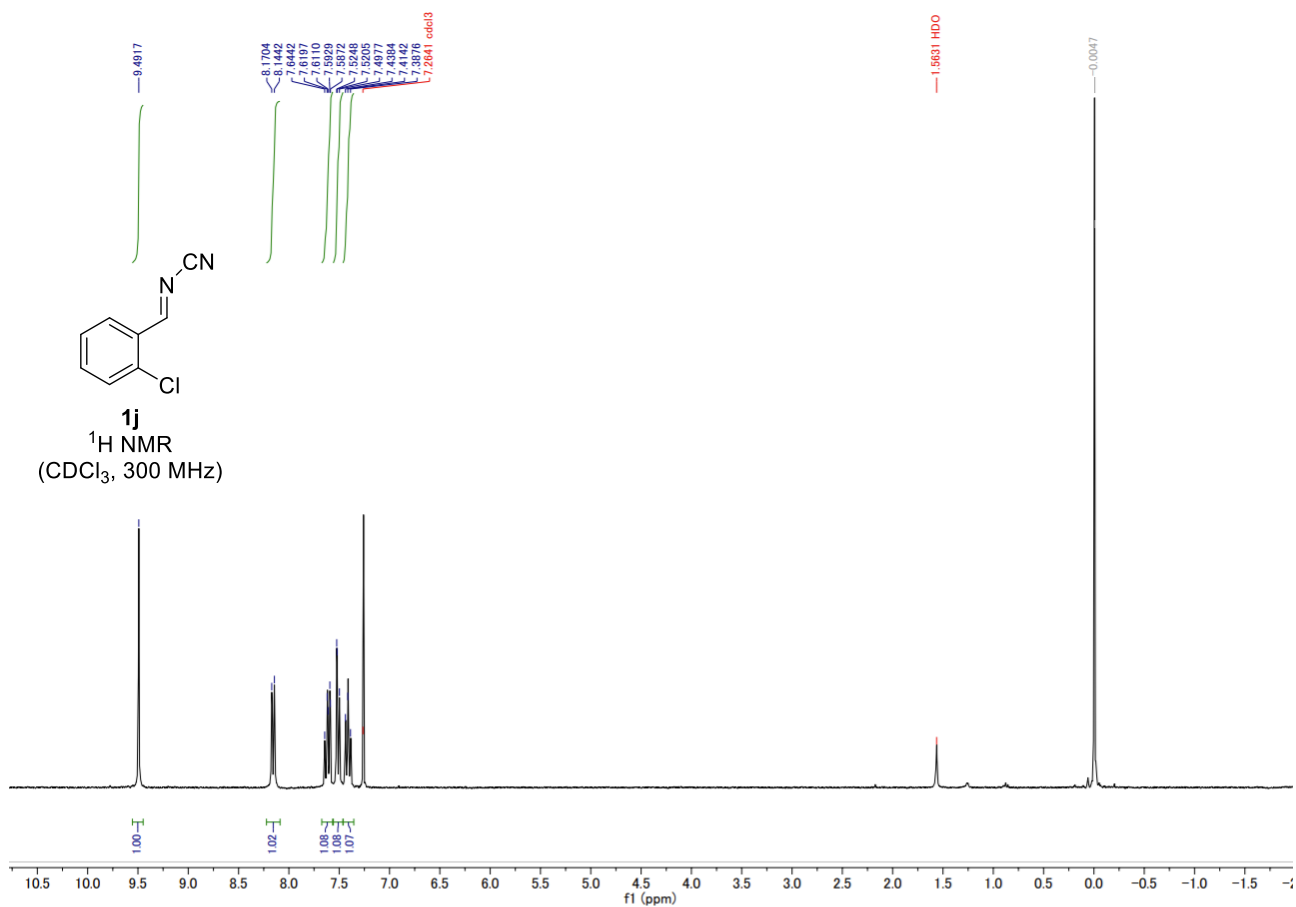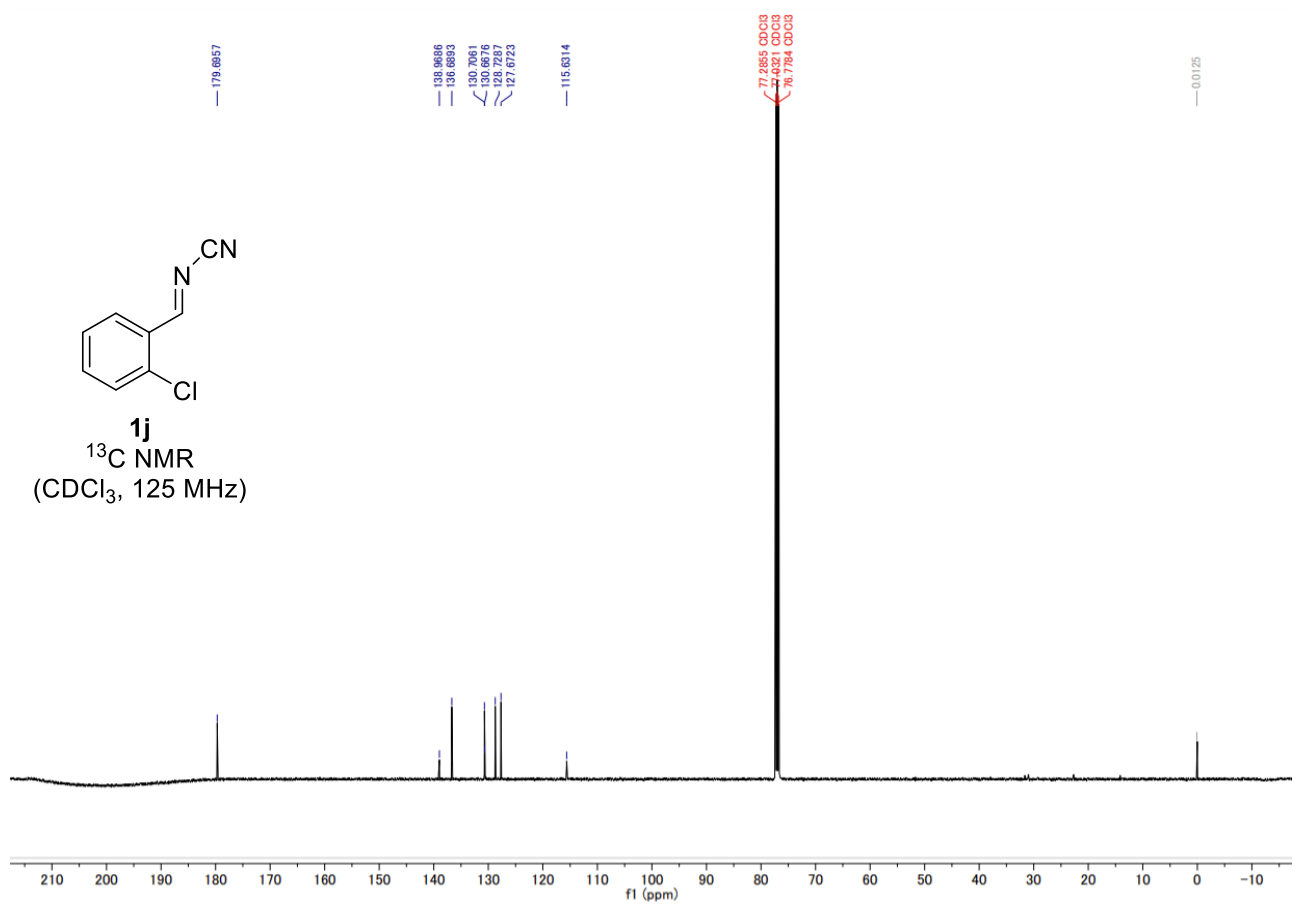

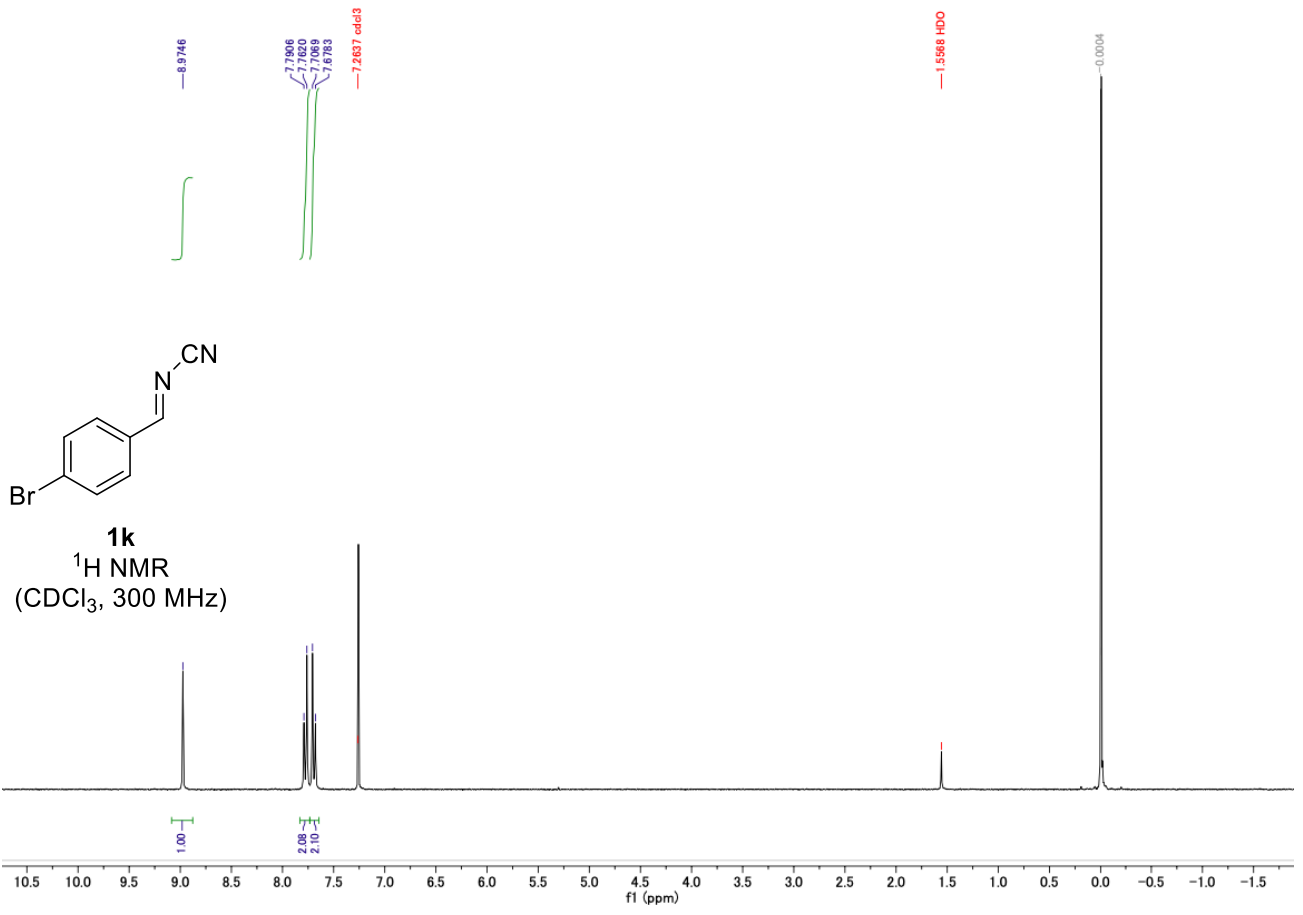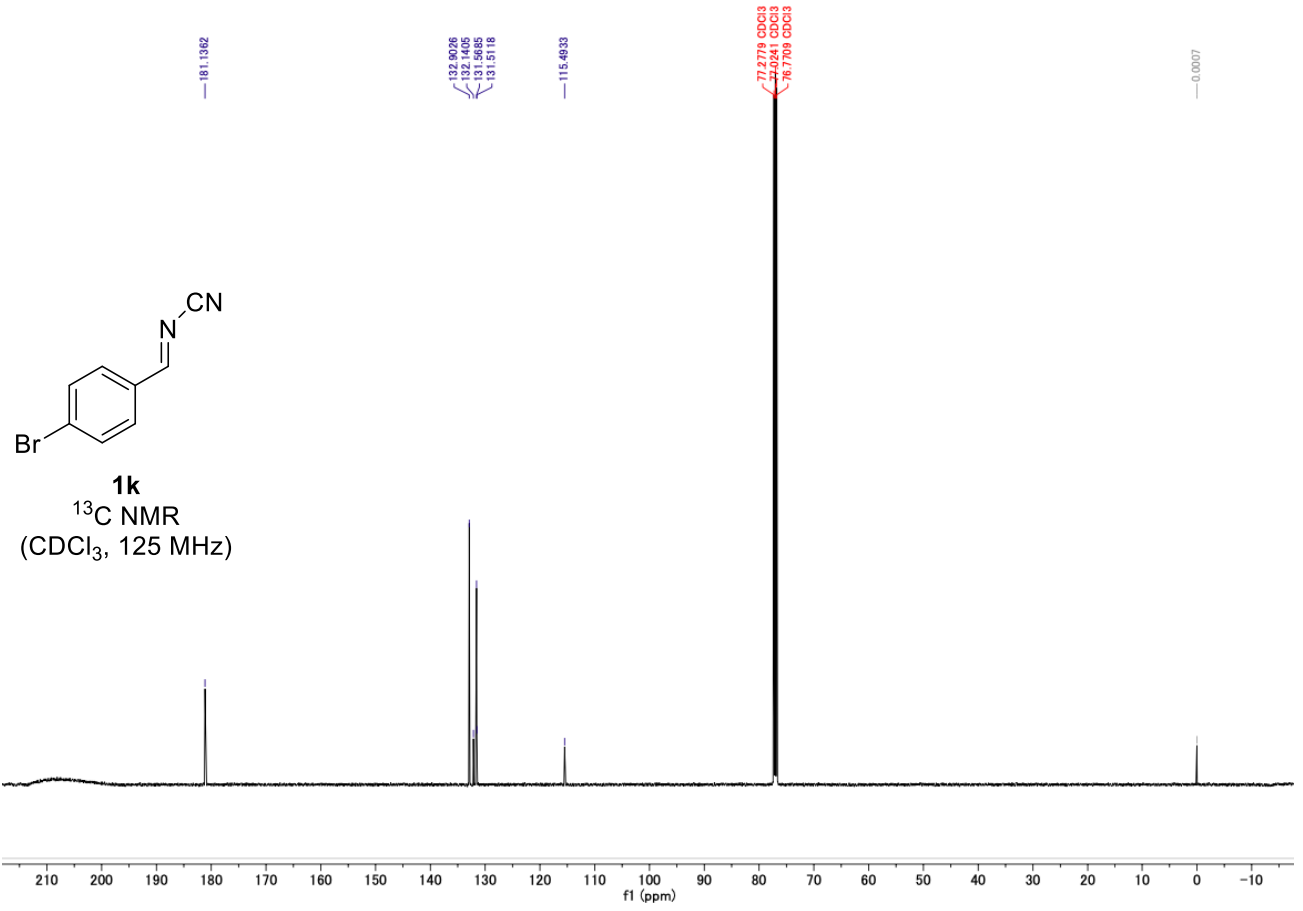

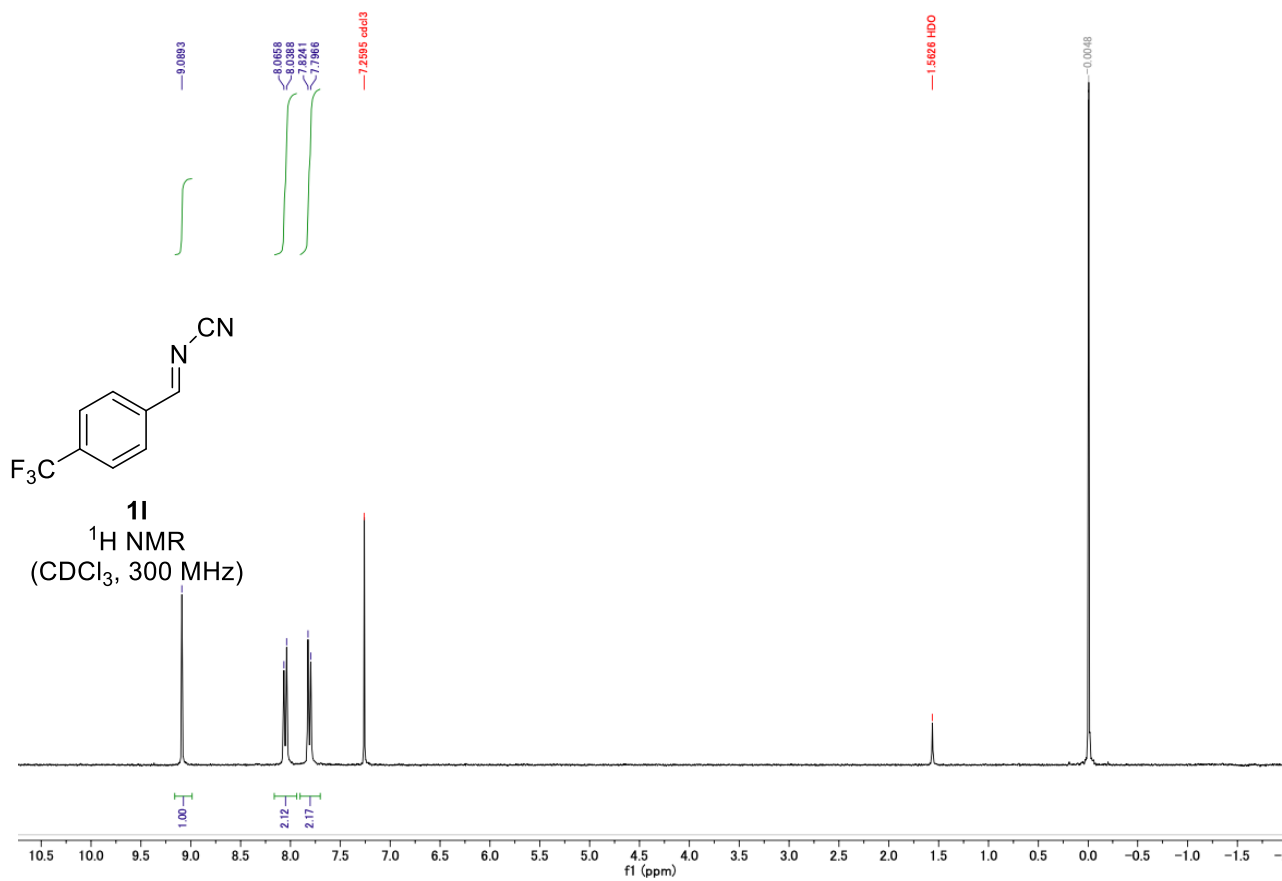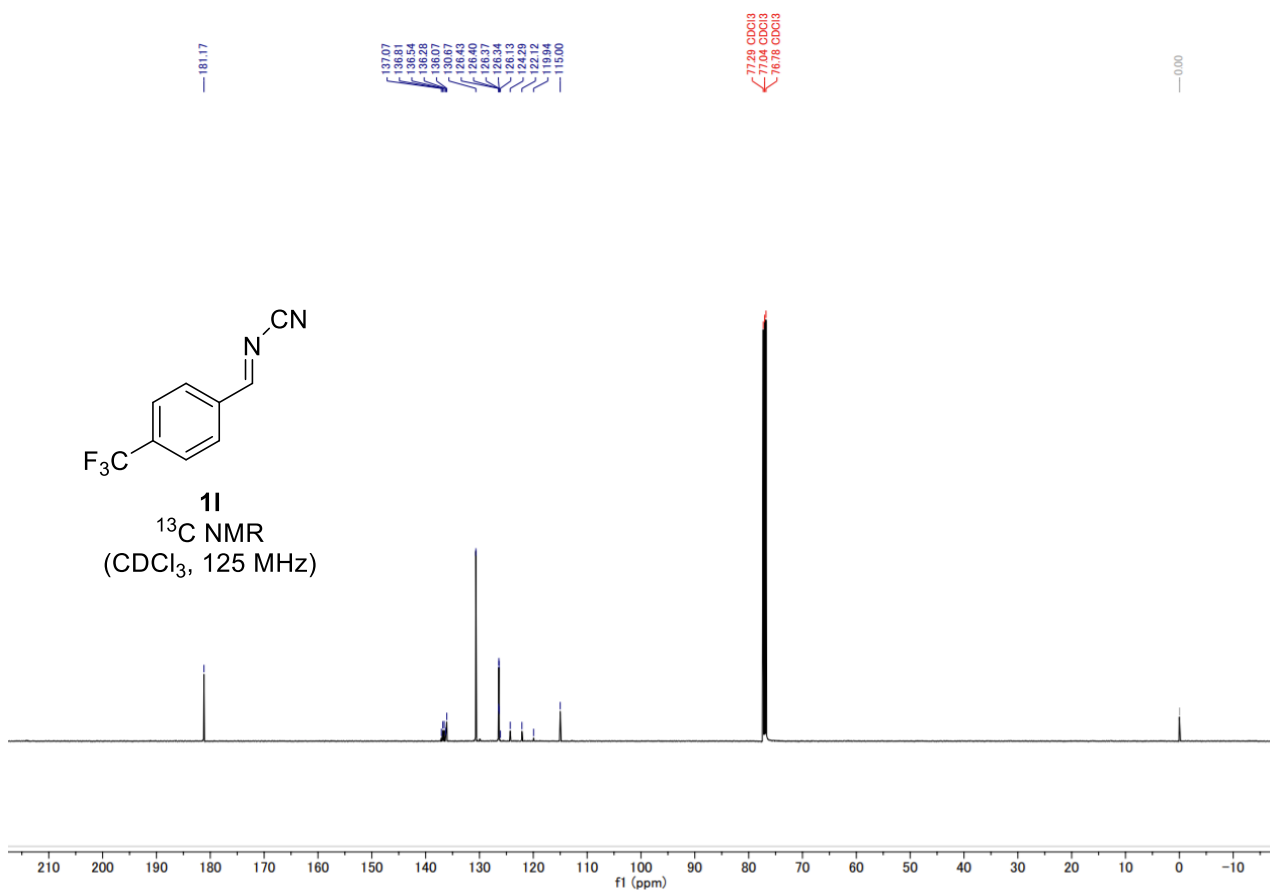

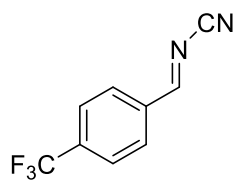

**11**  
<sup>19</sup>F NMR  
(CDCl<sub>3</sub>, 282 MHz)

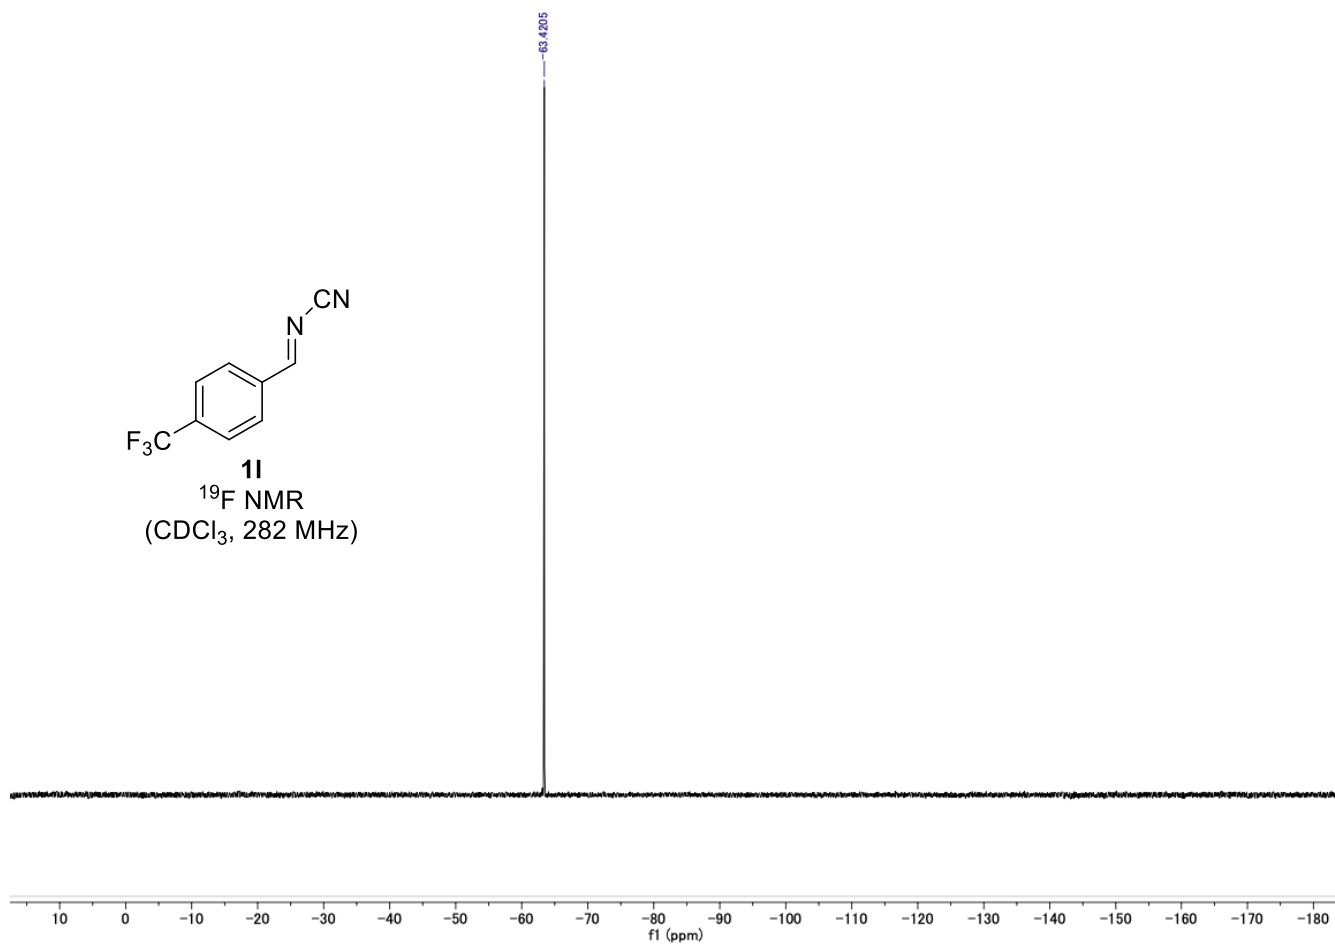



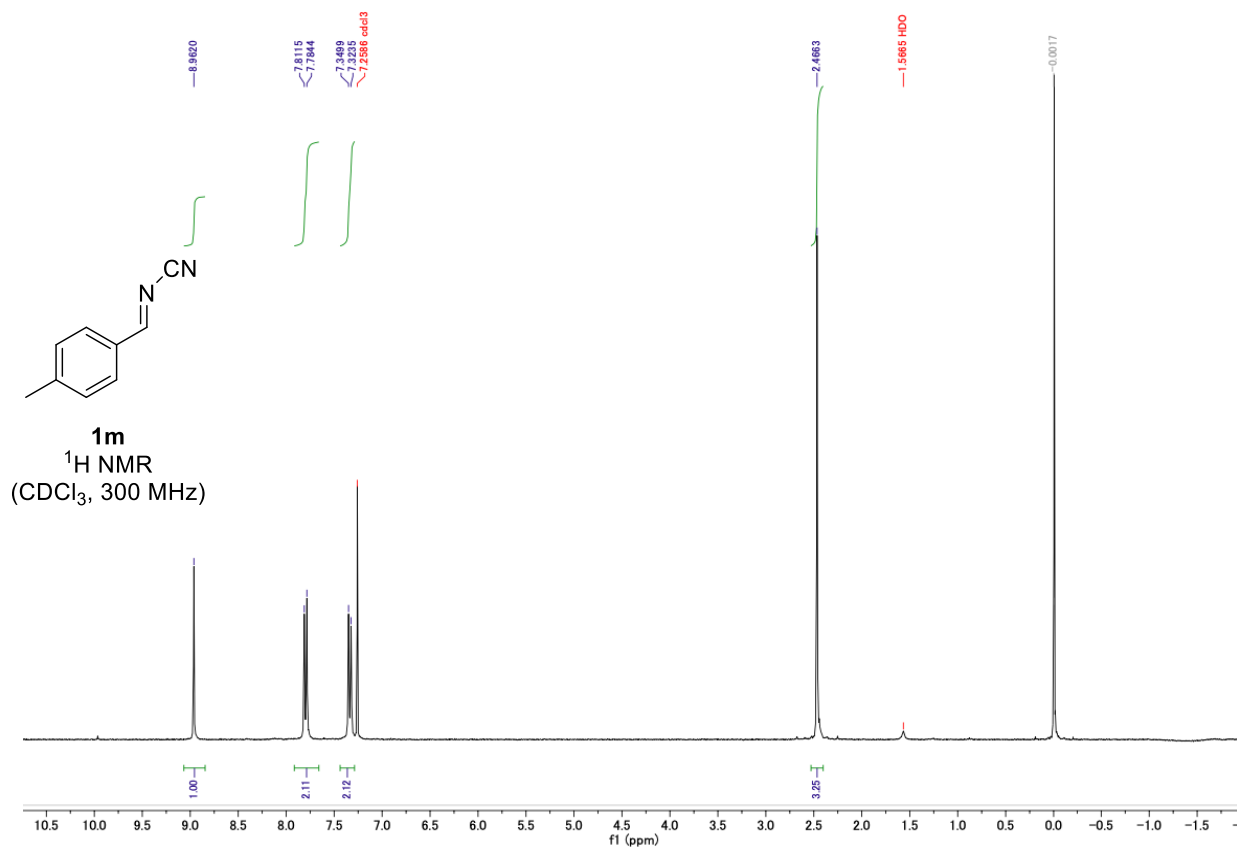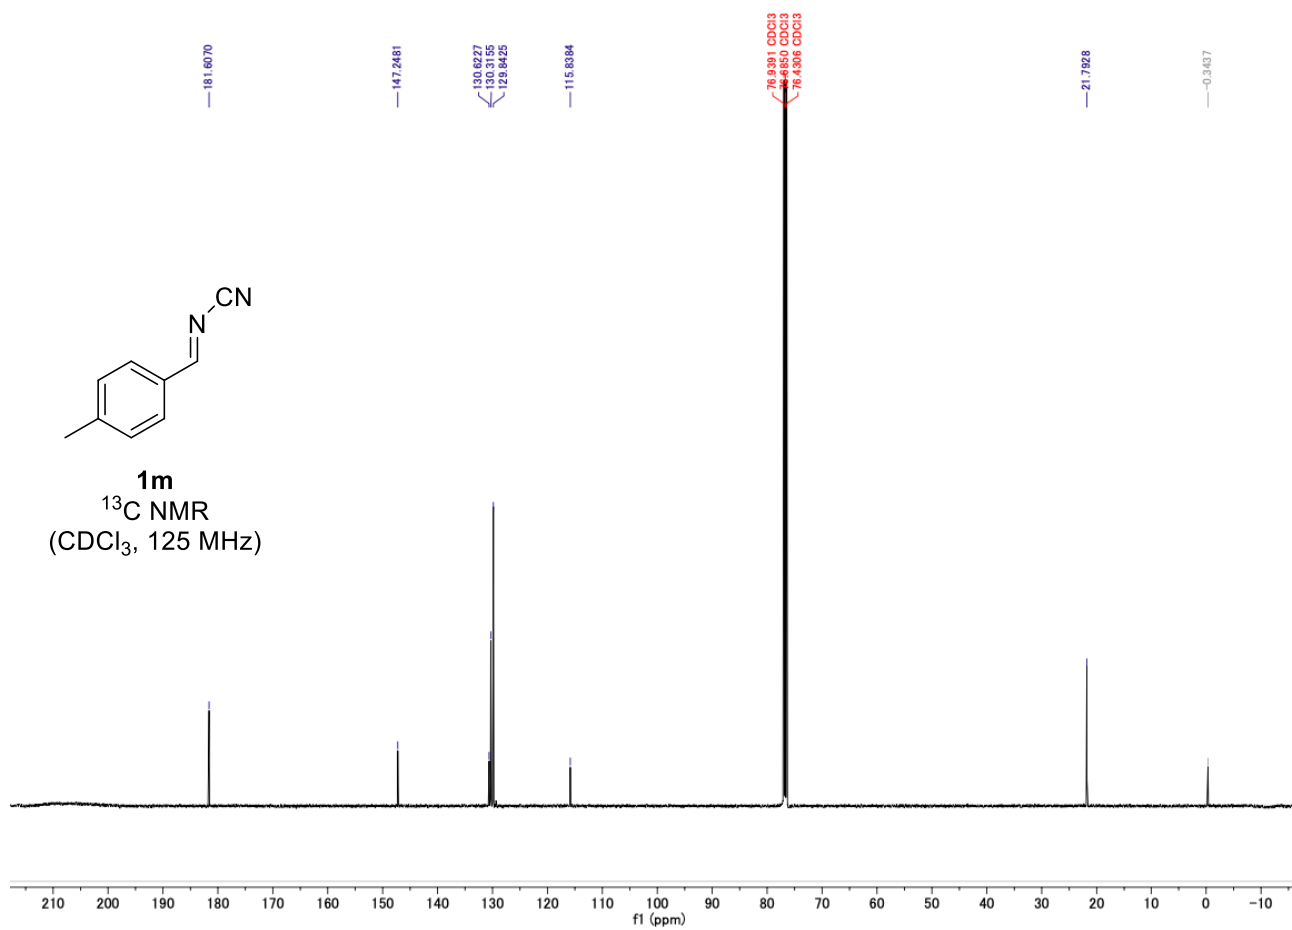

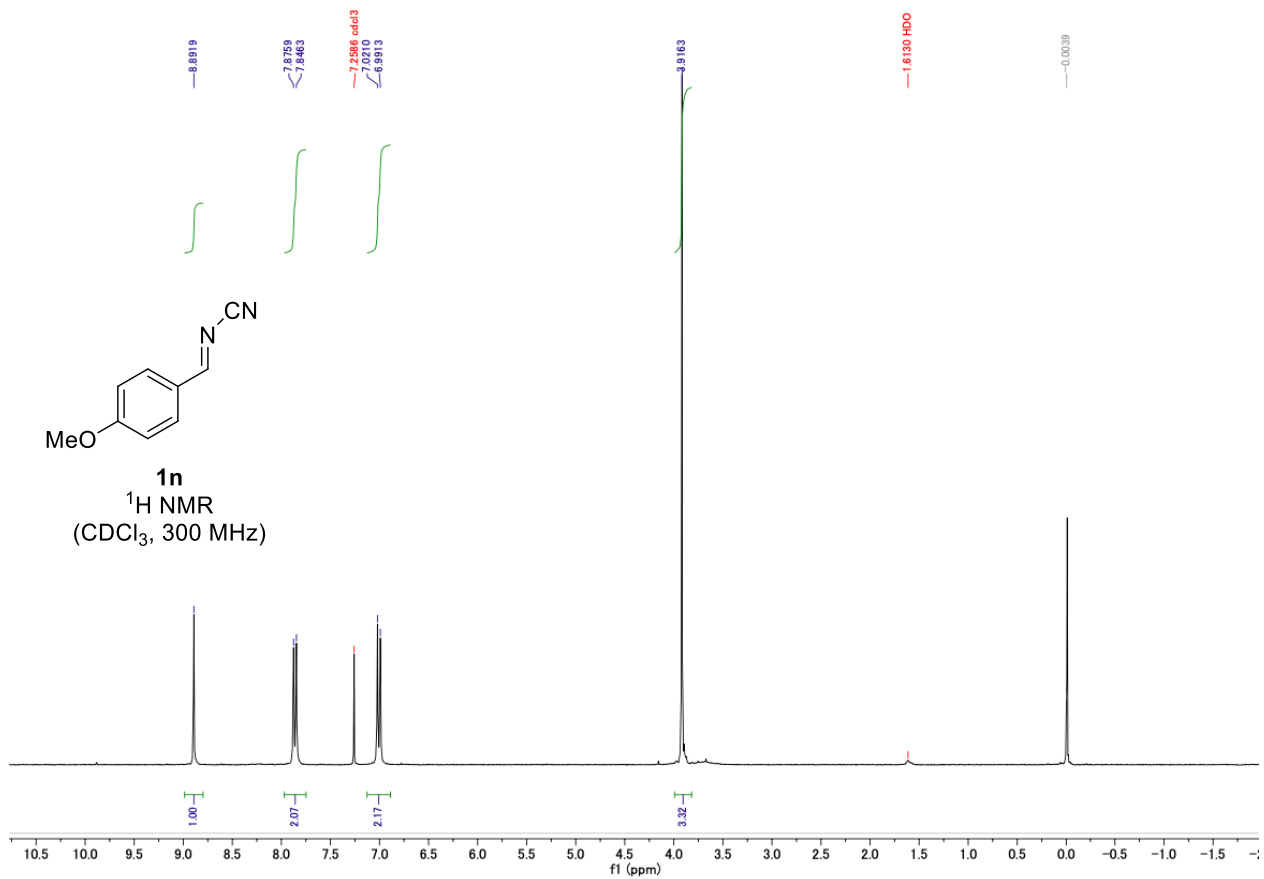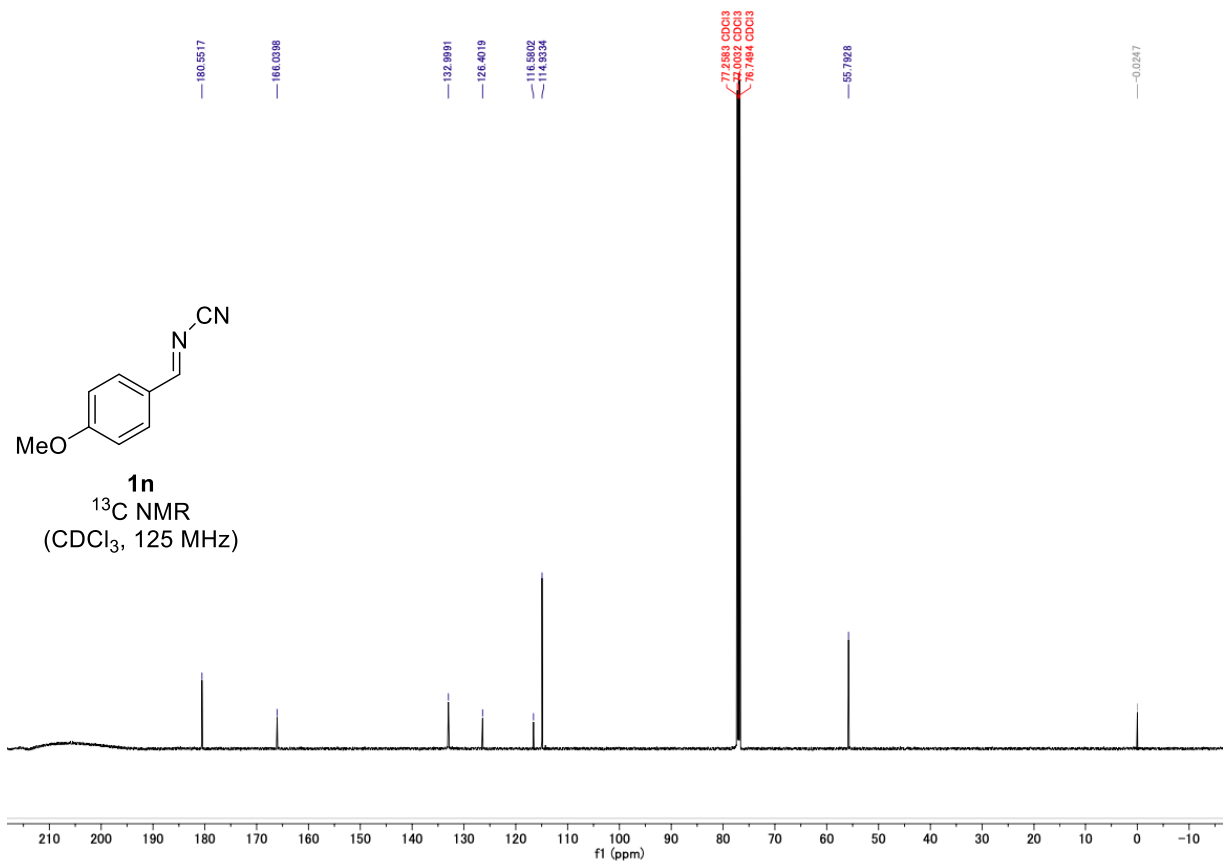

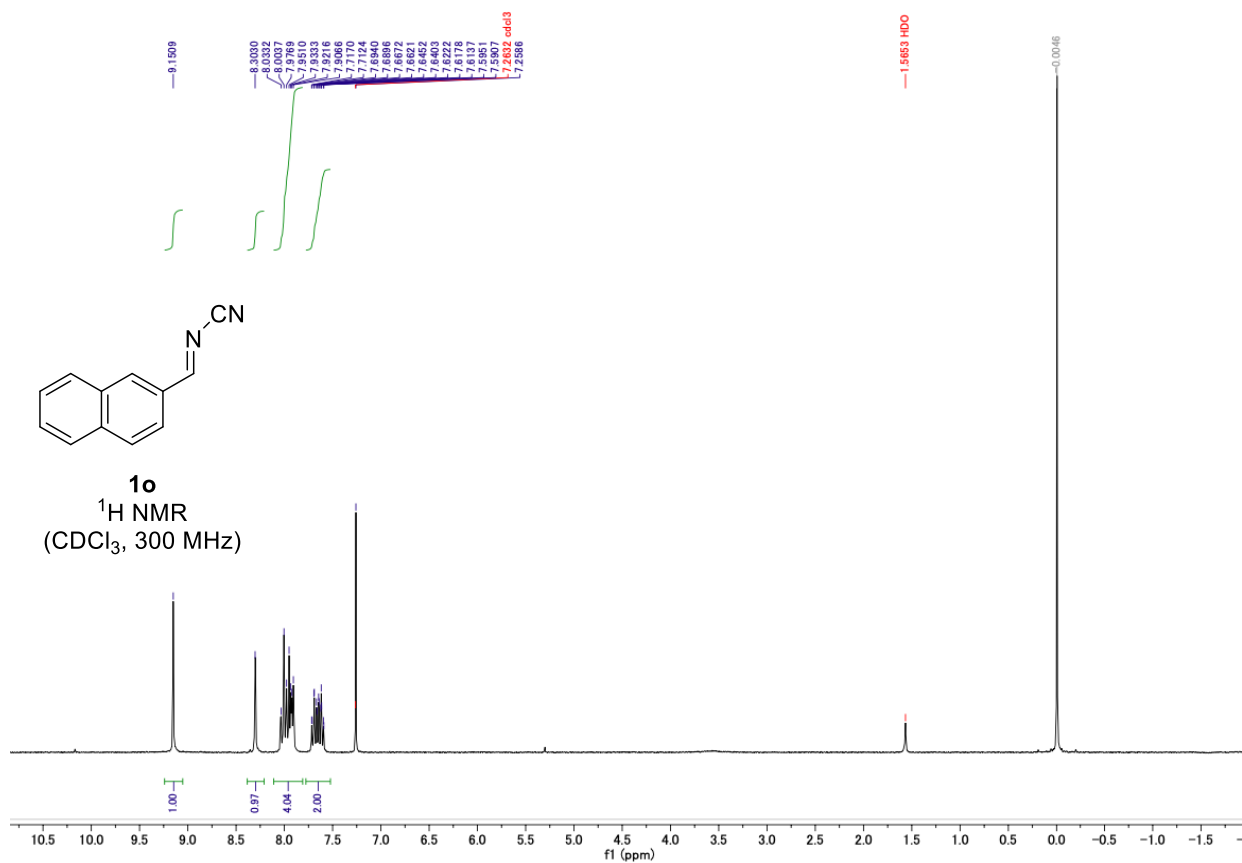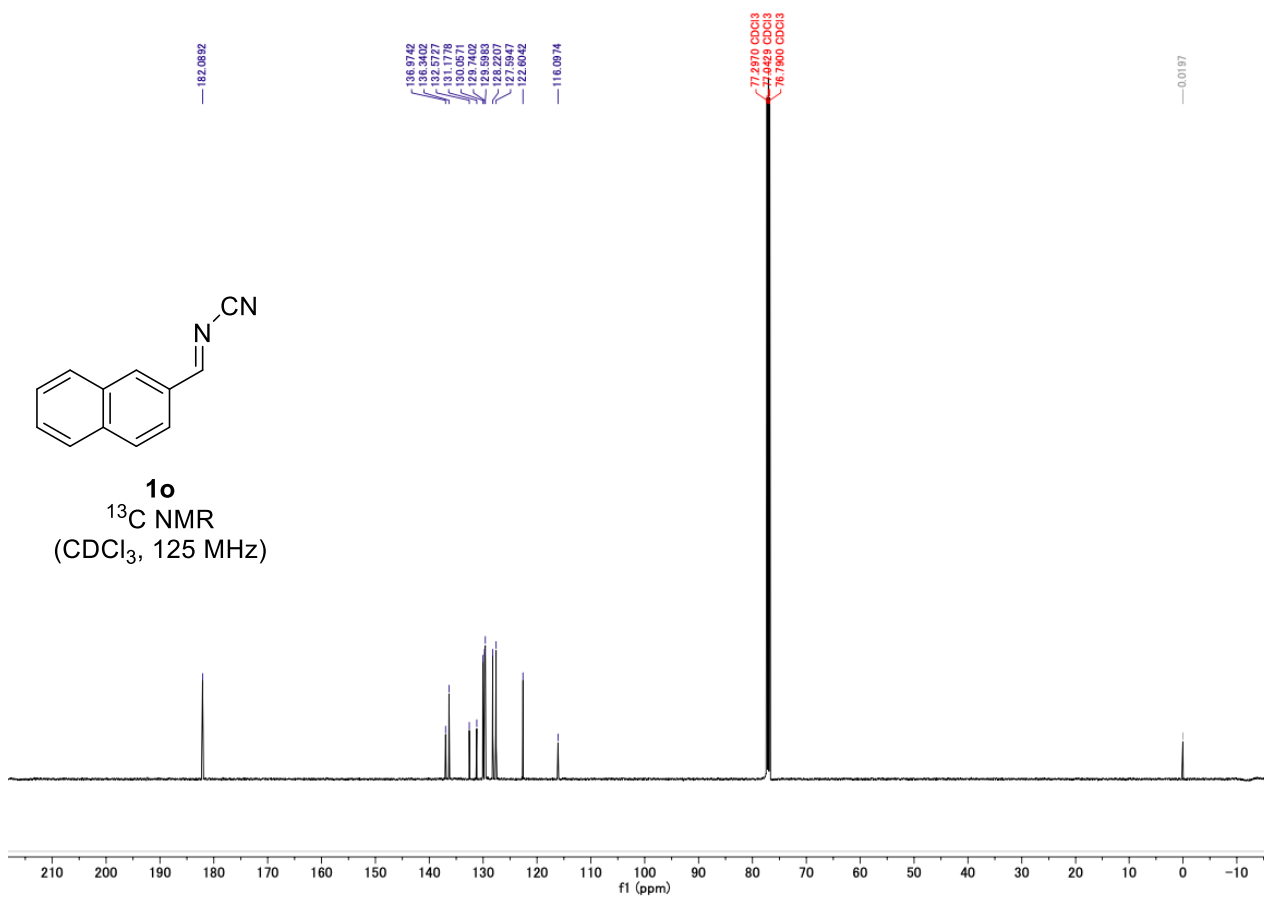

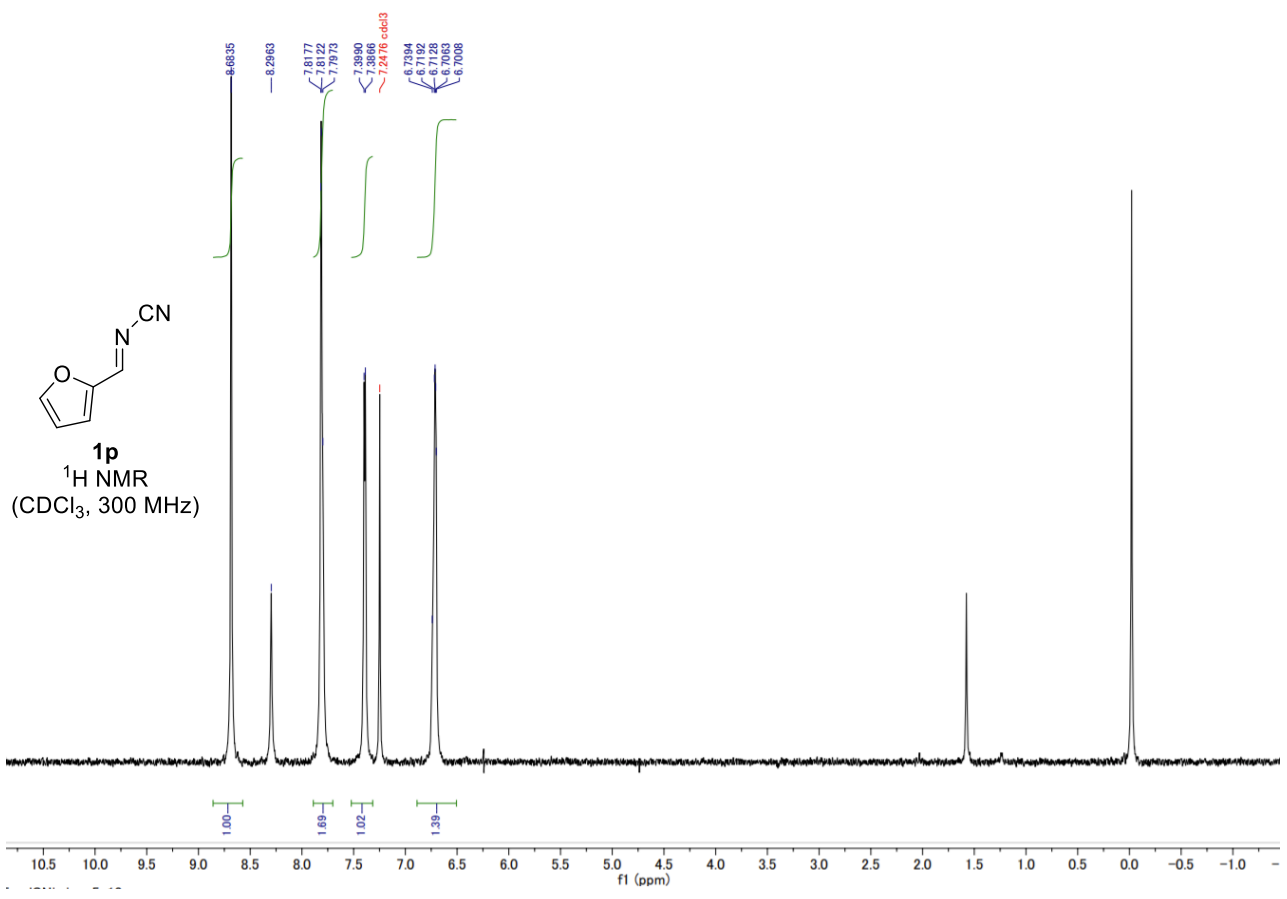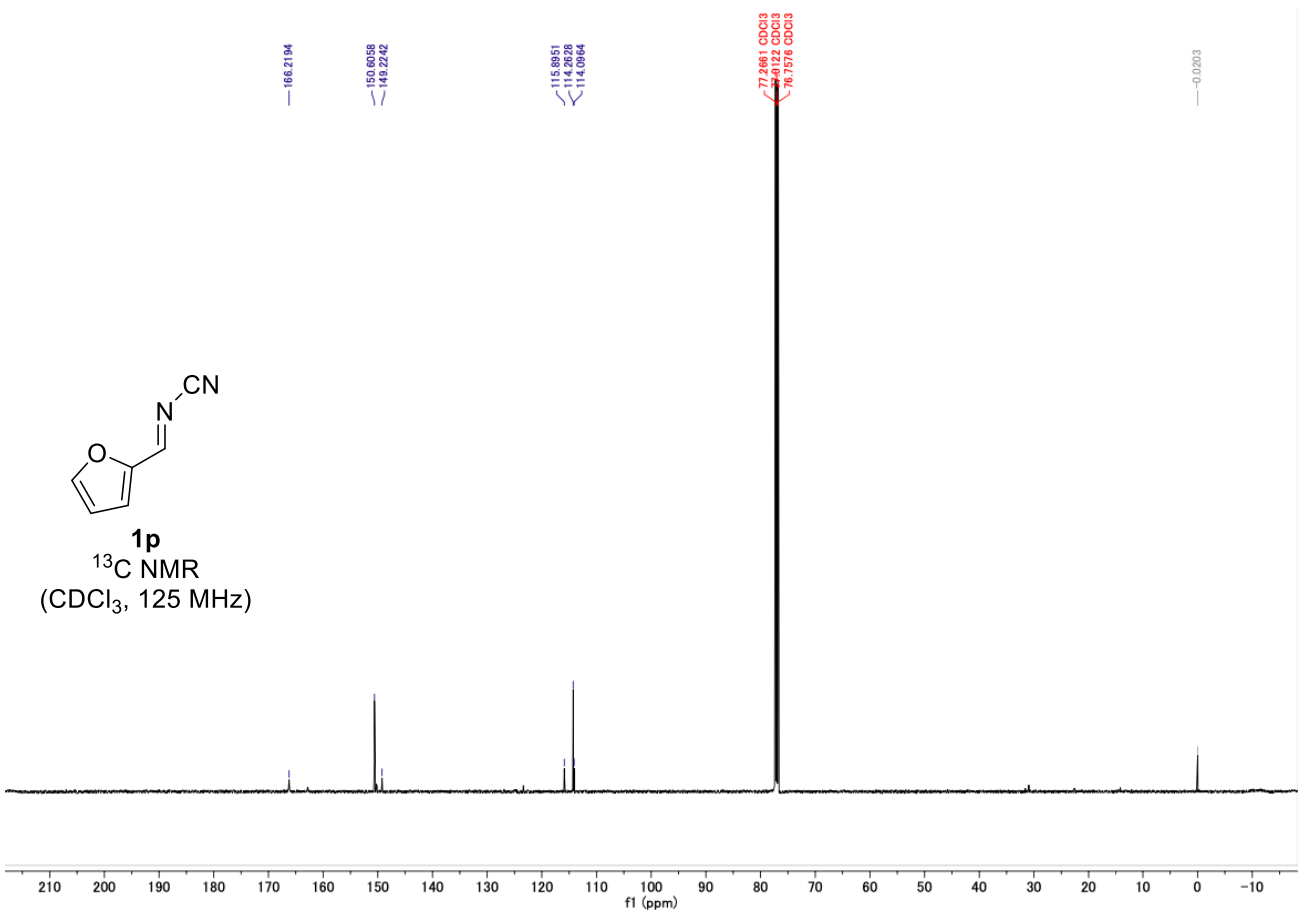

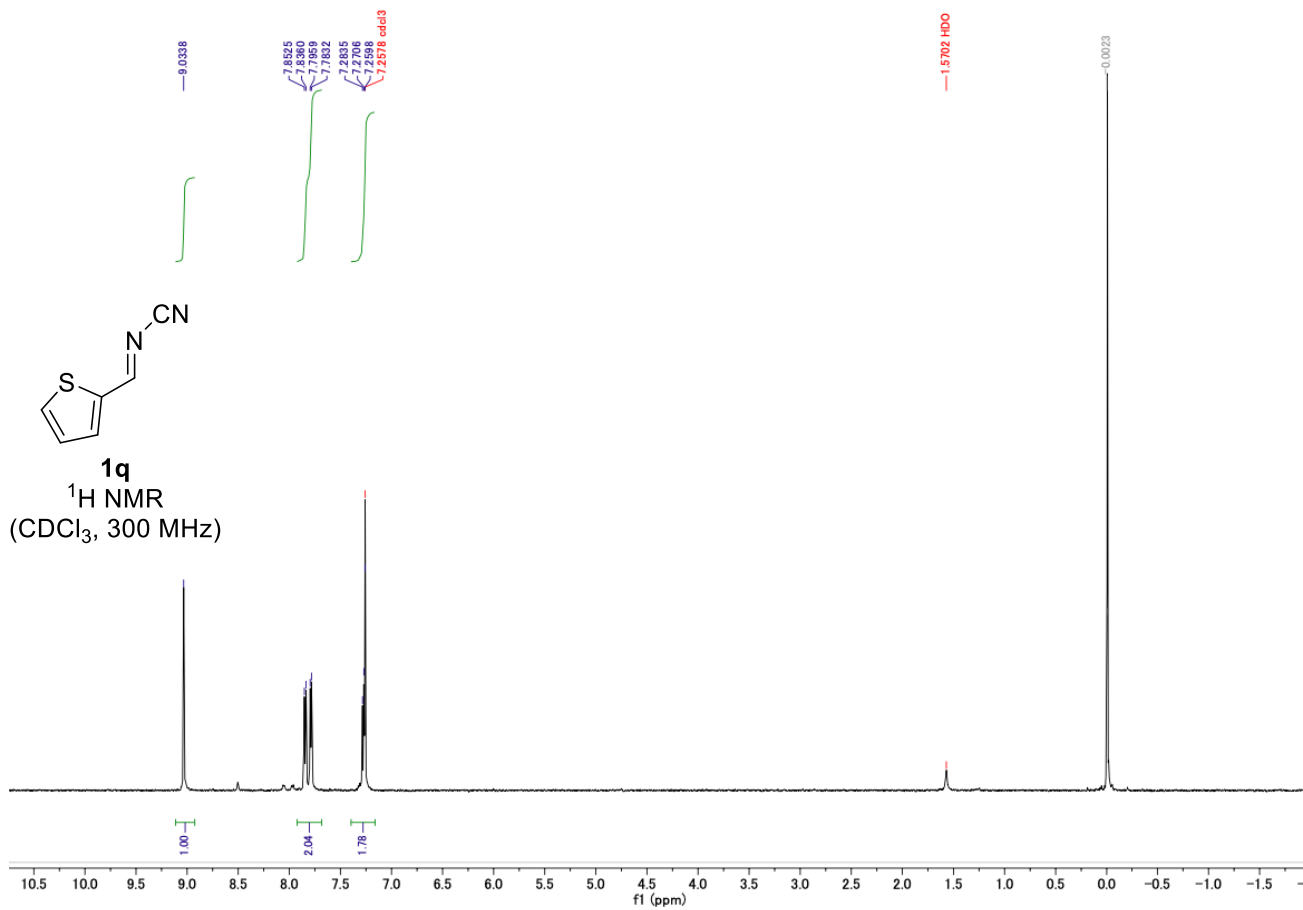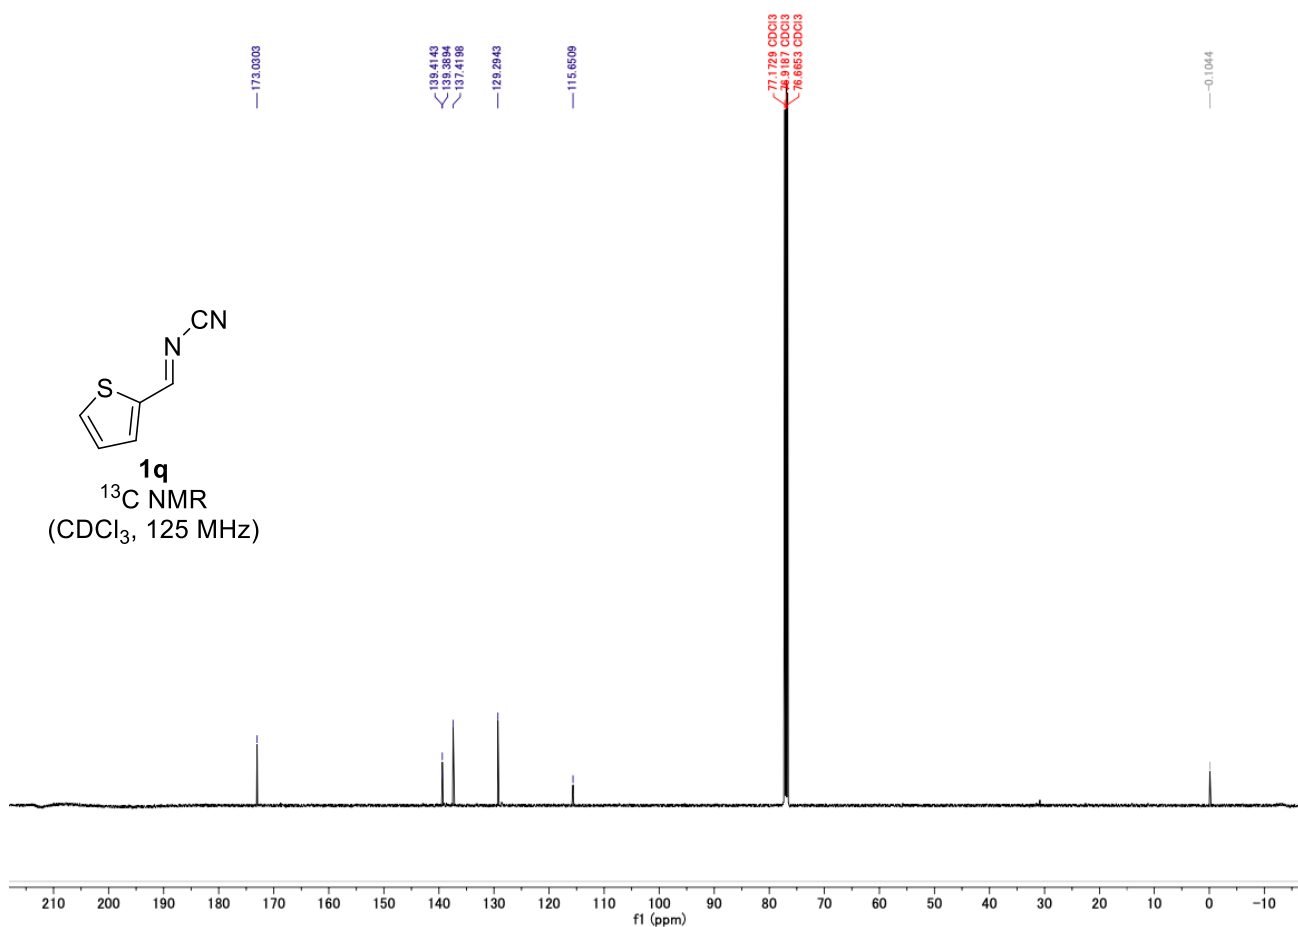

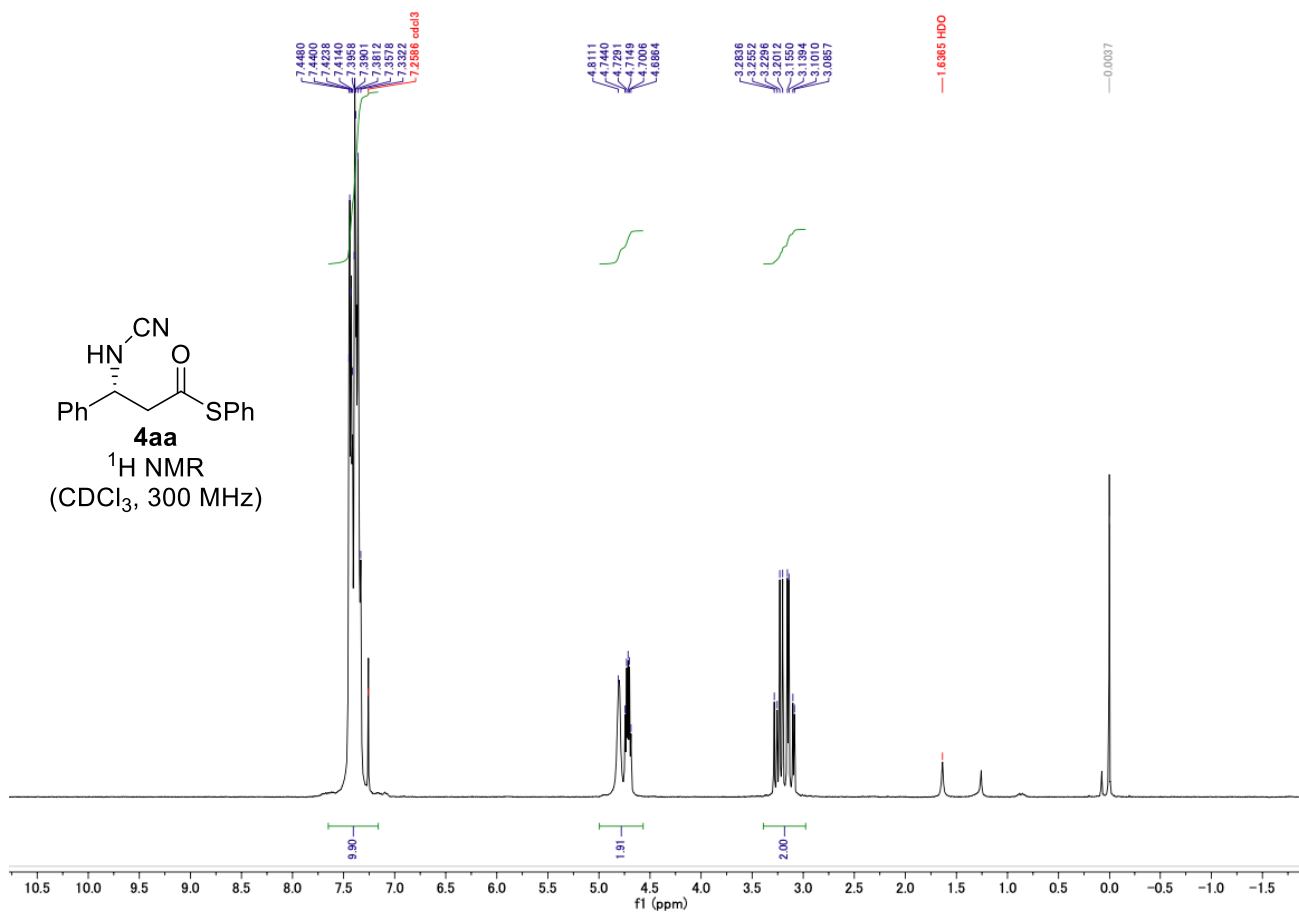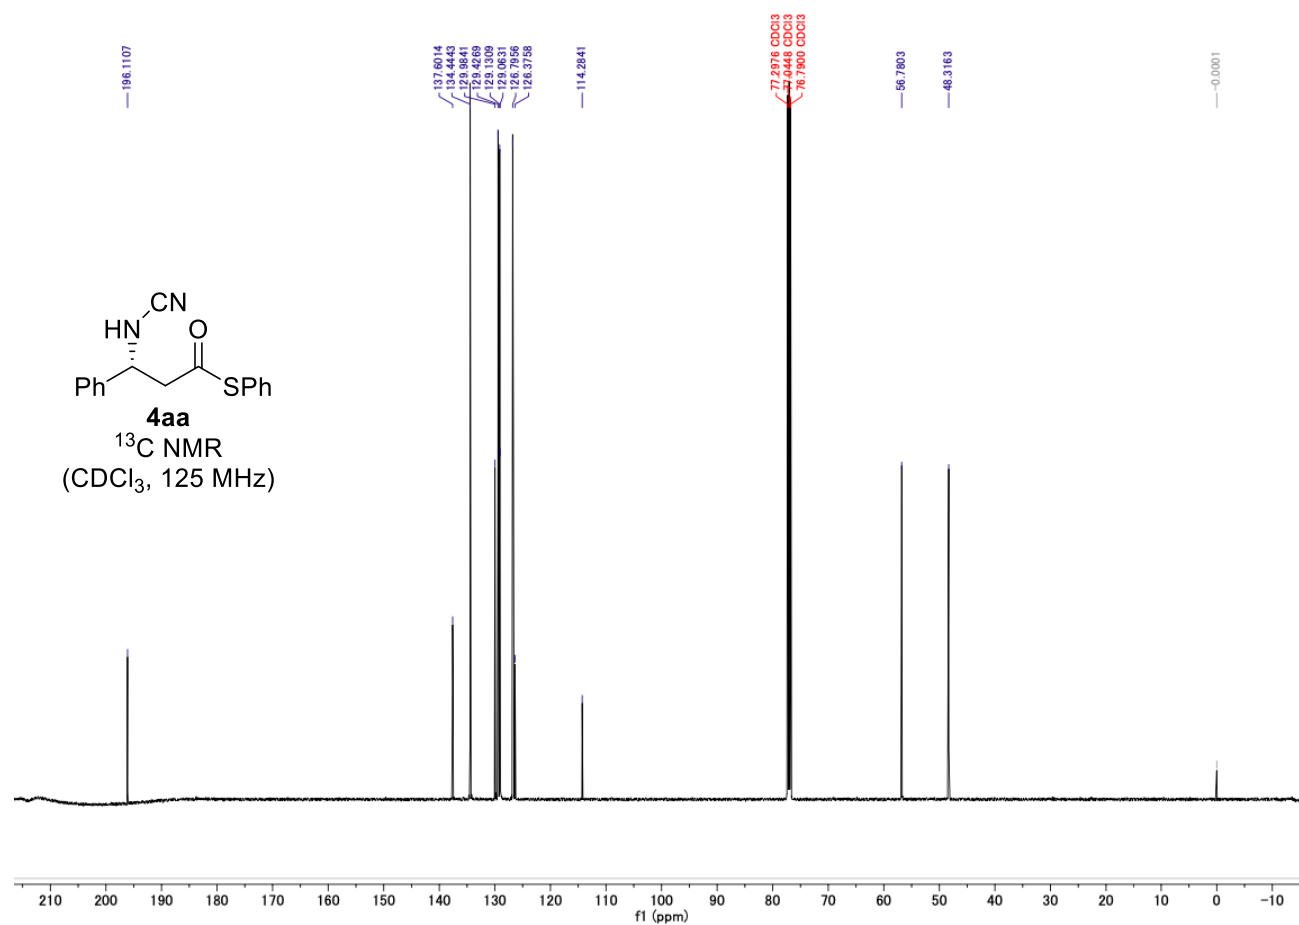

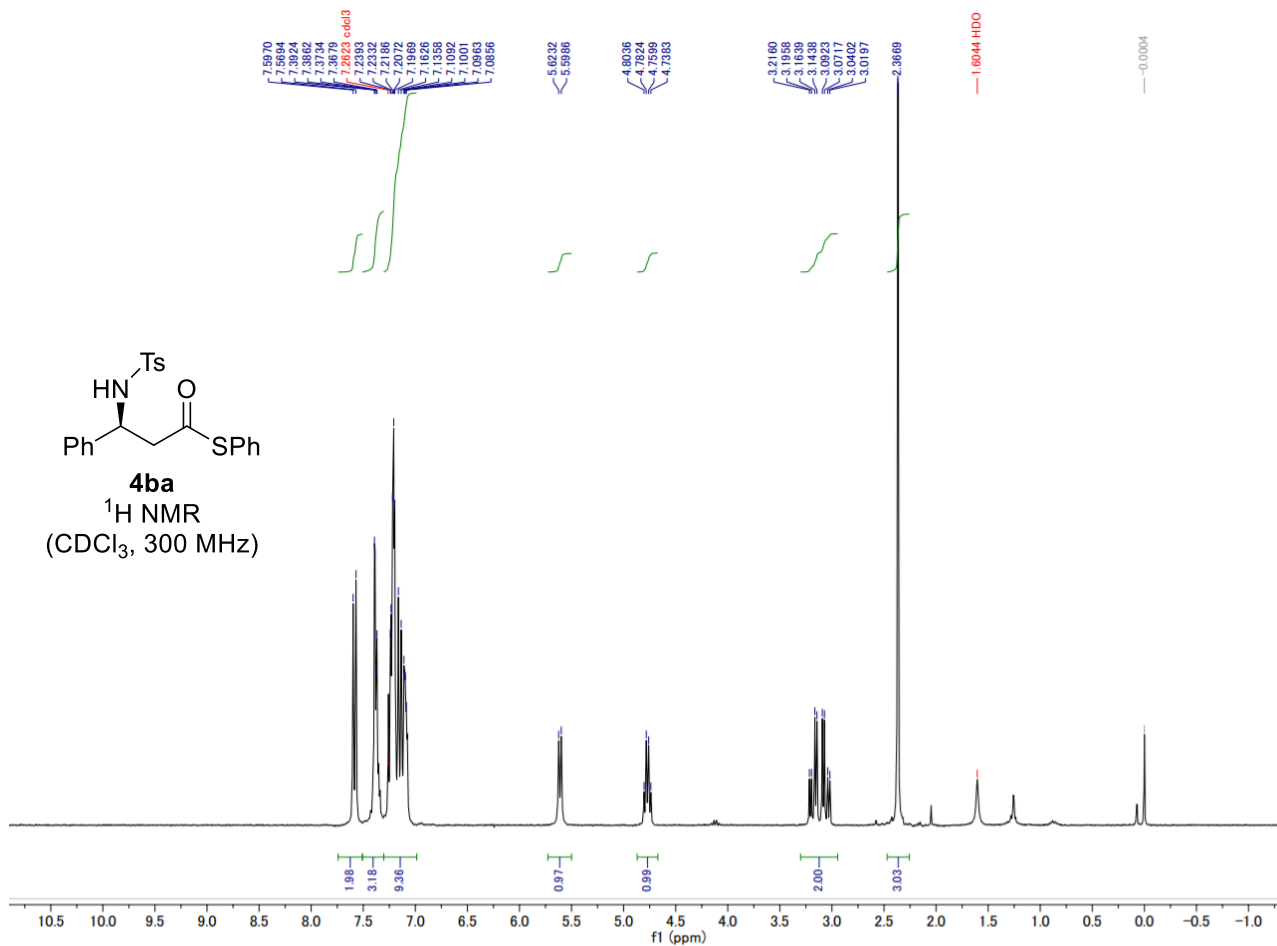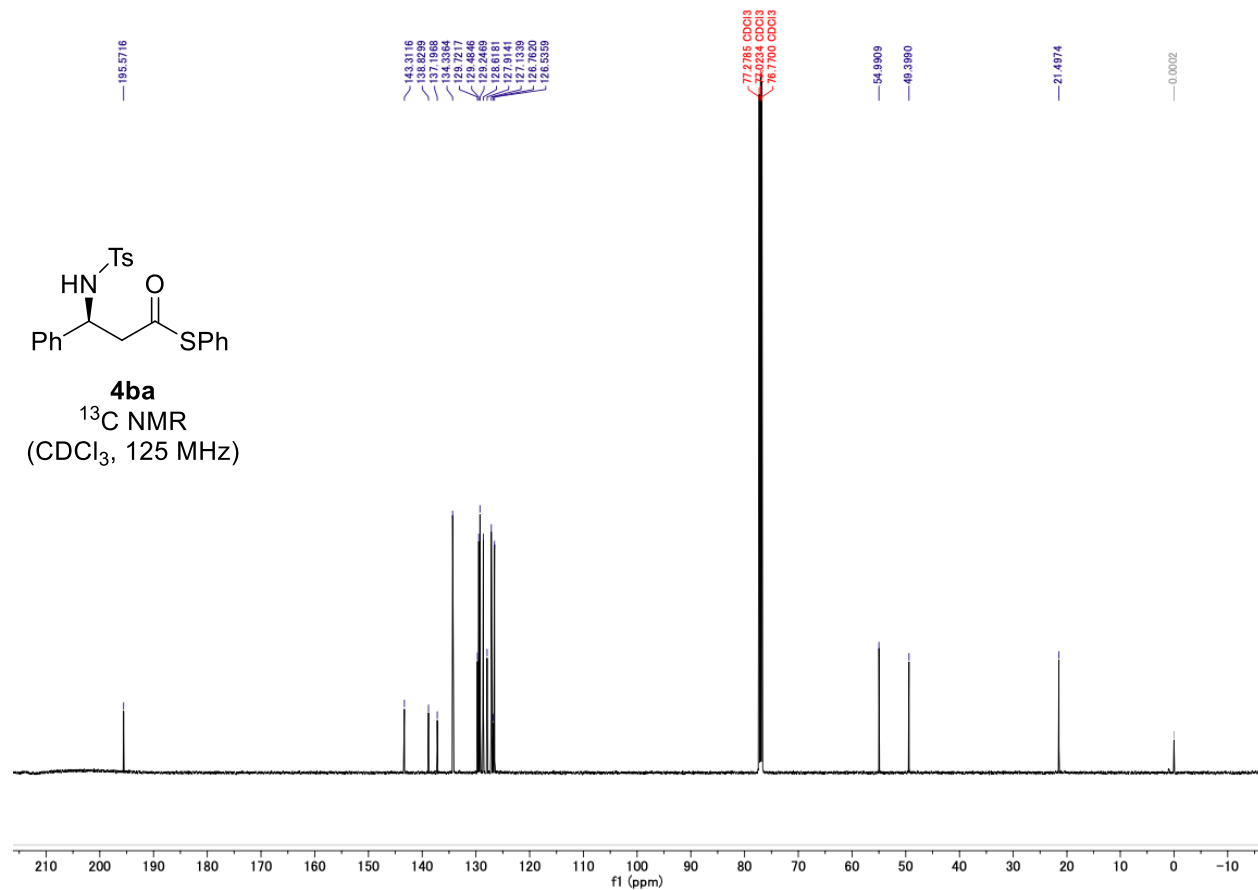

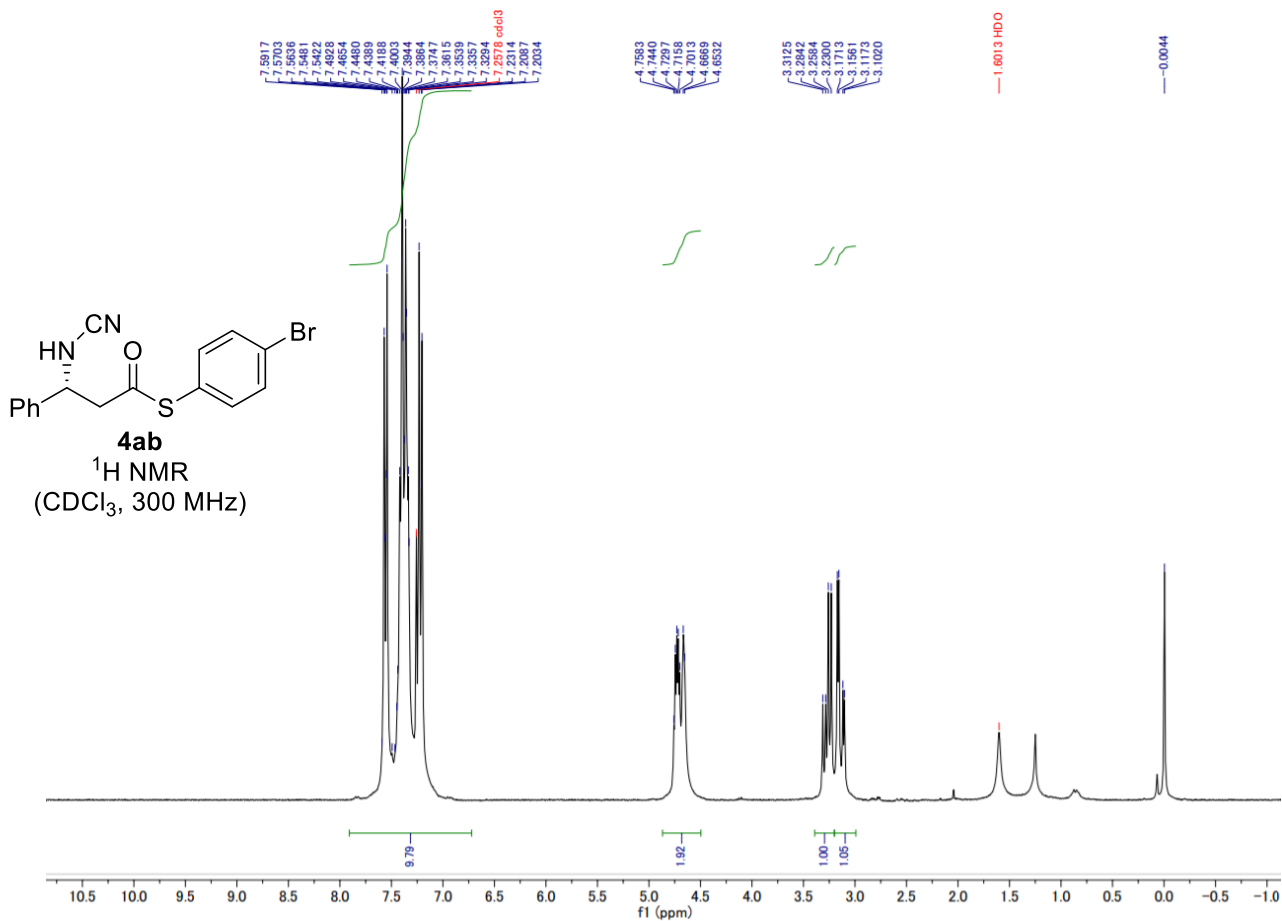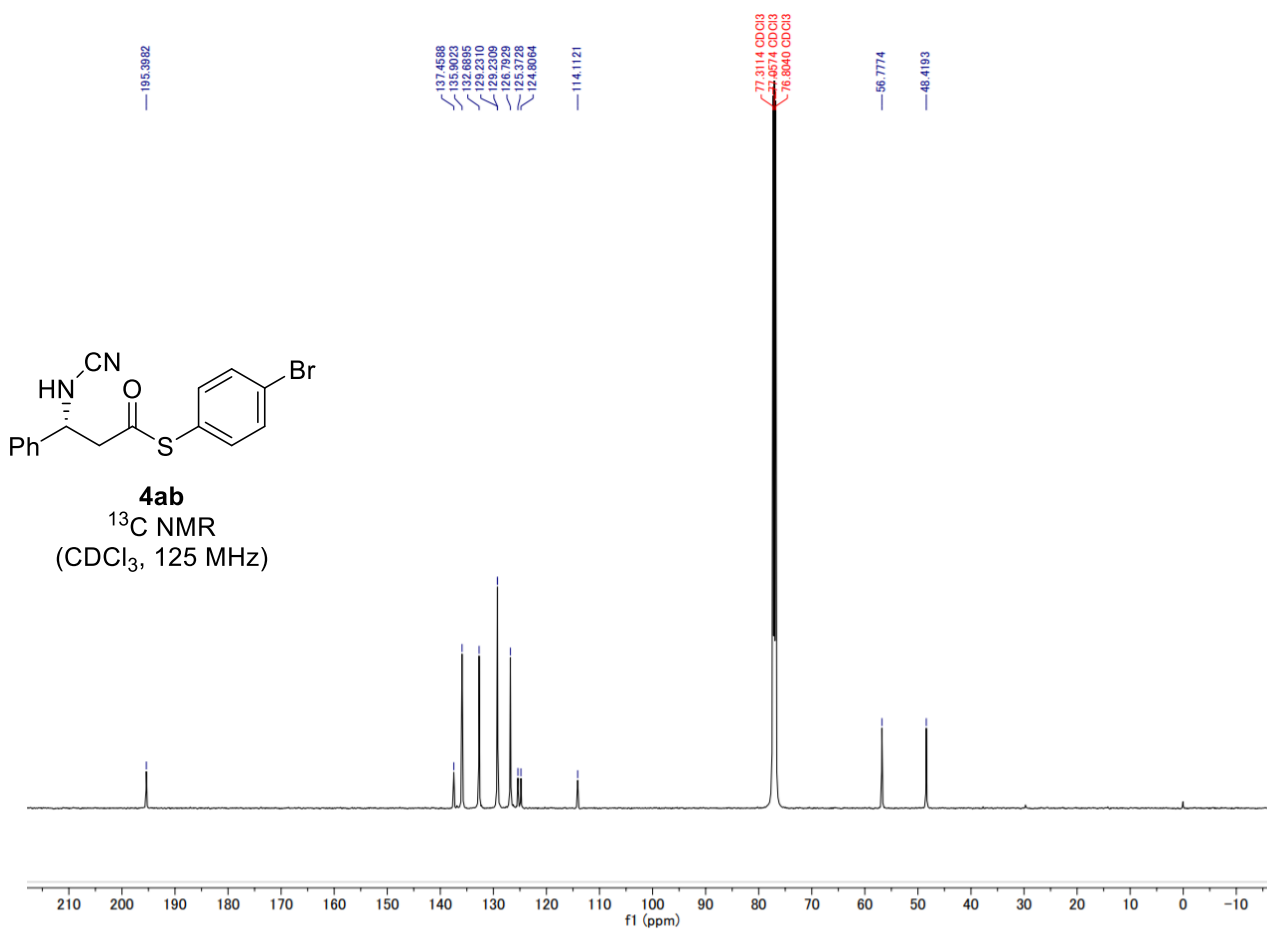



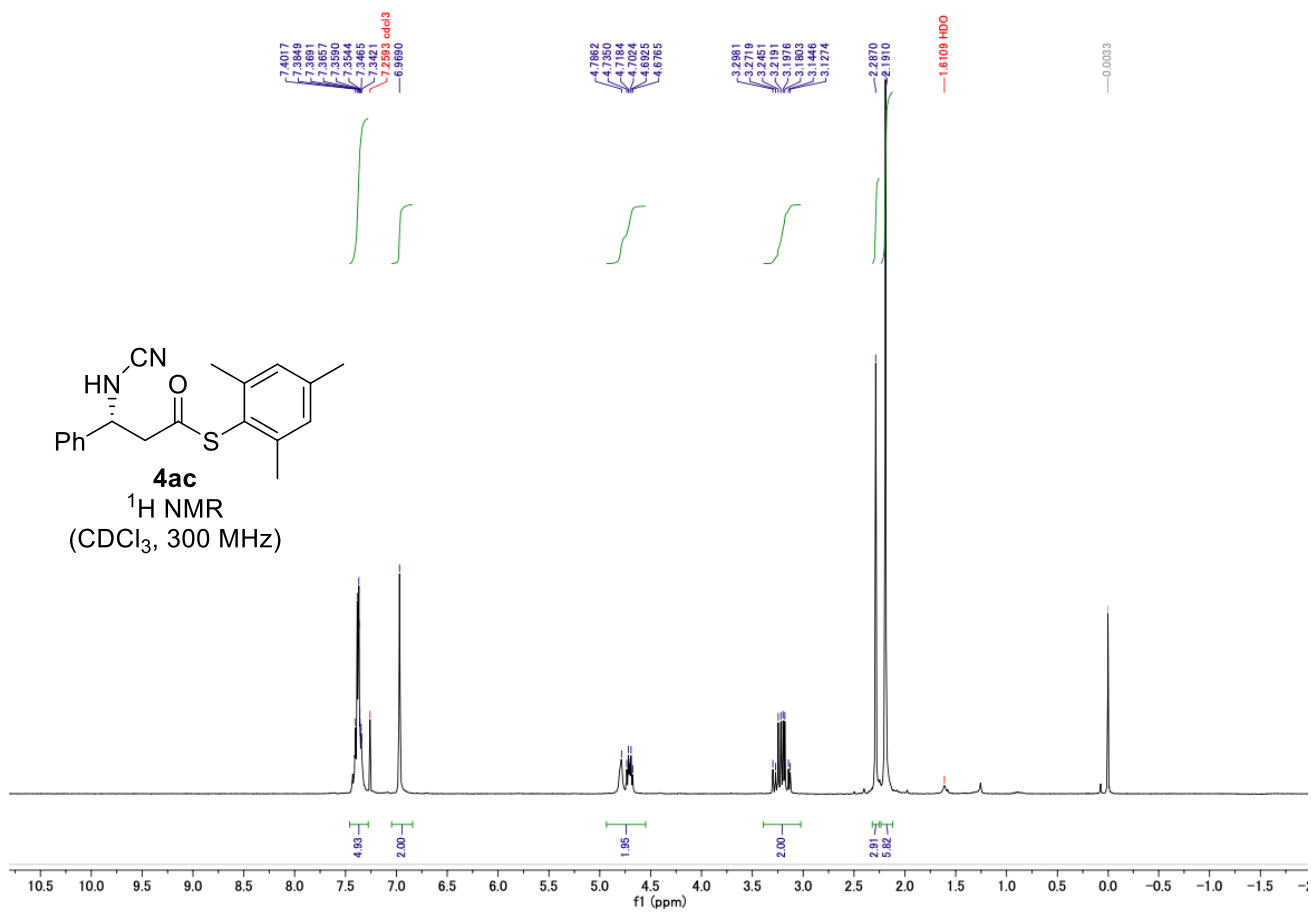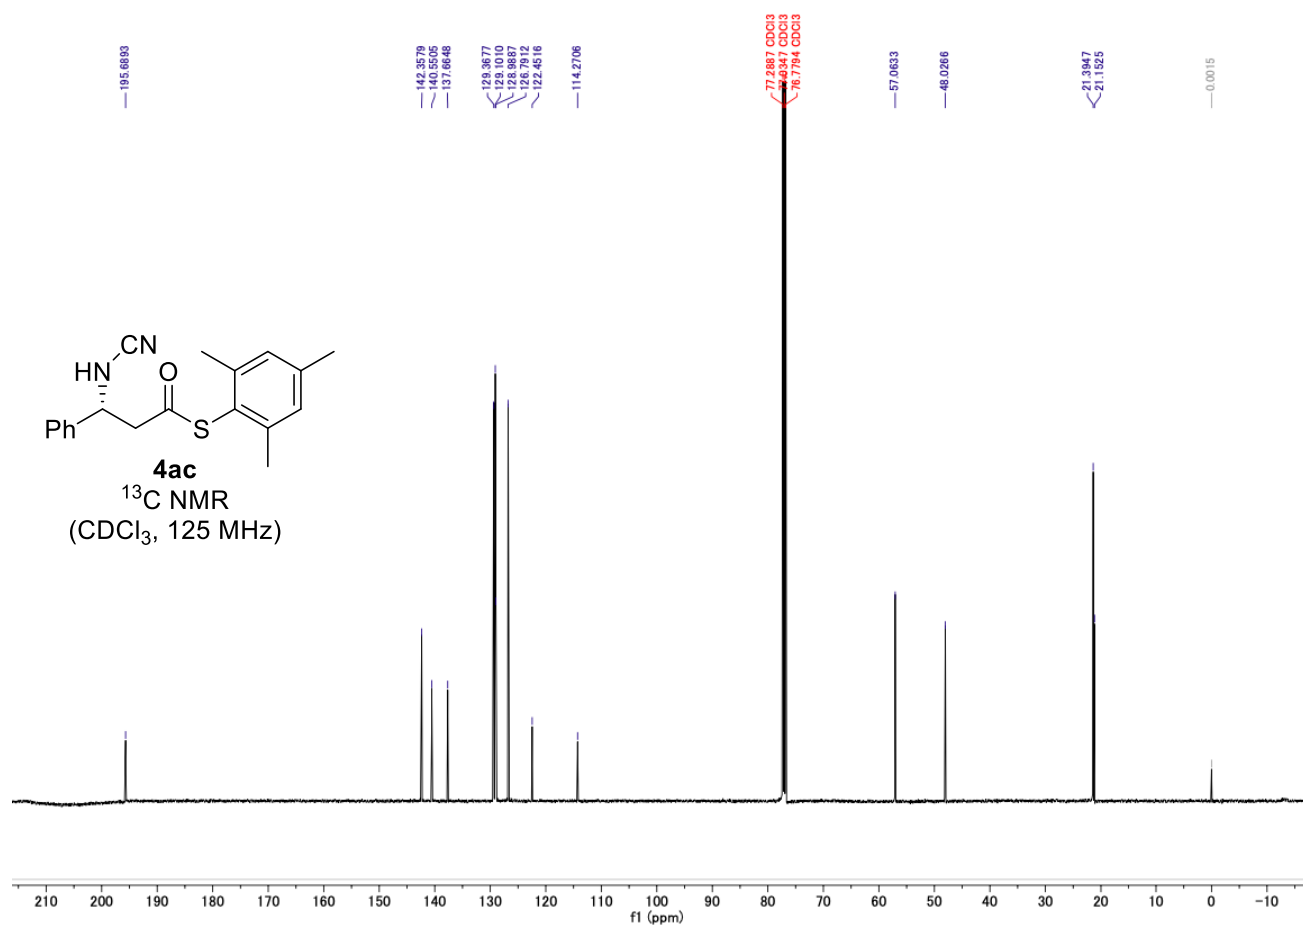

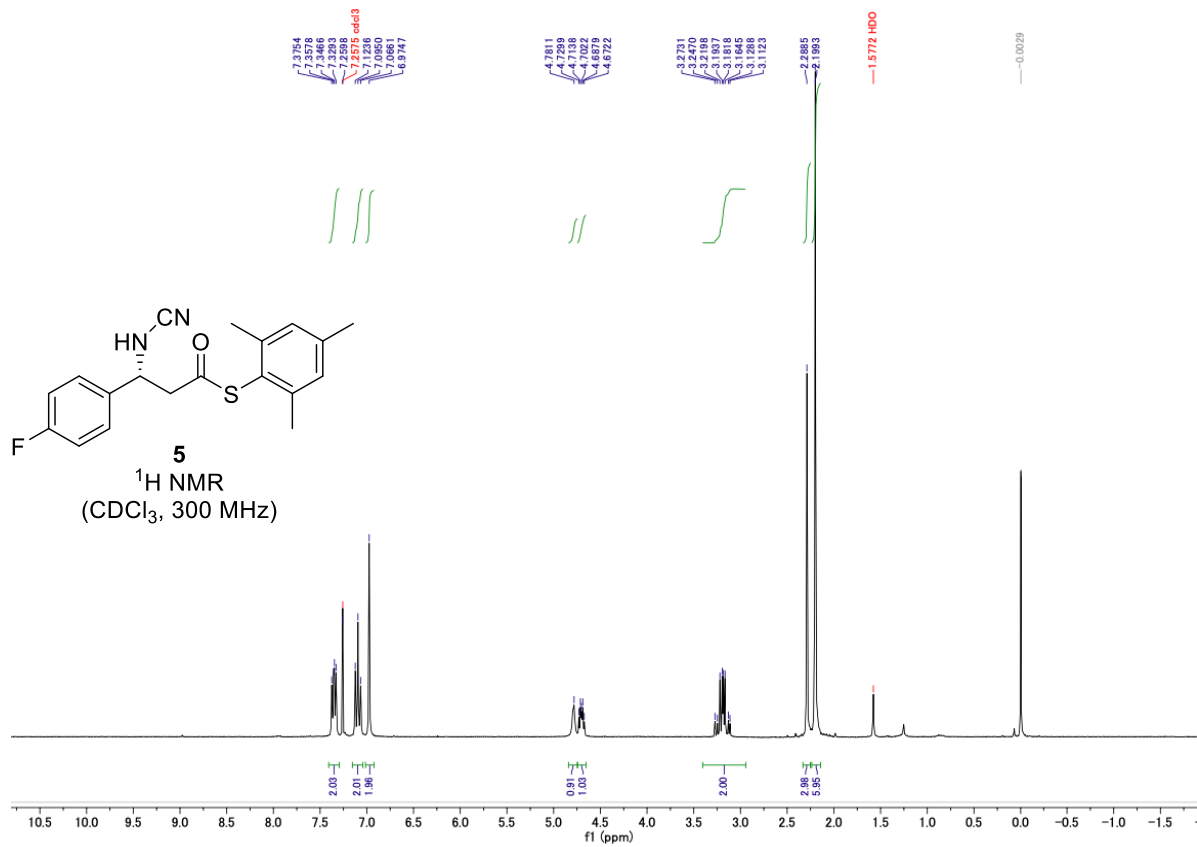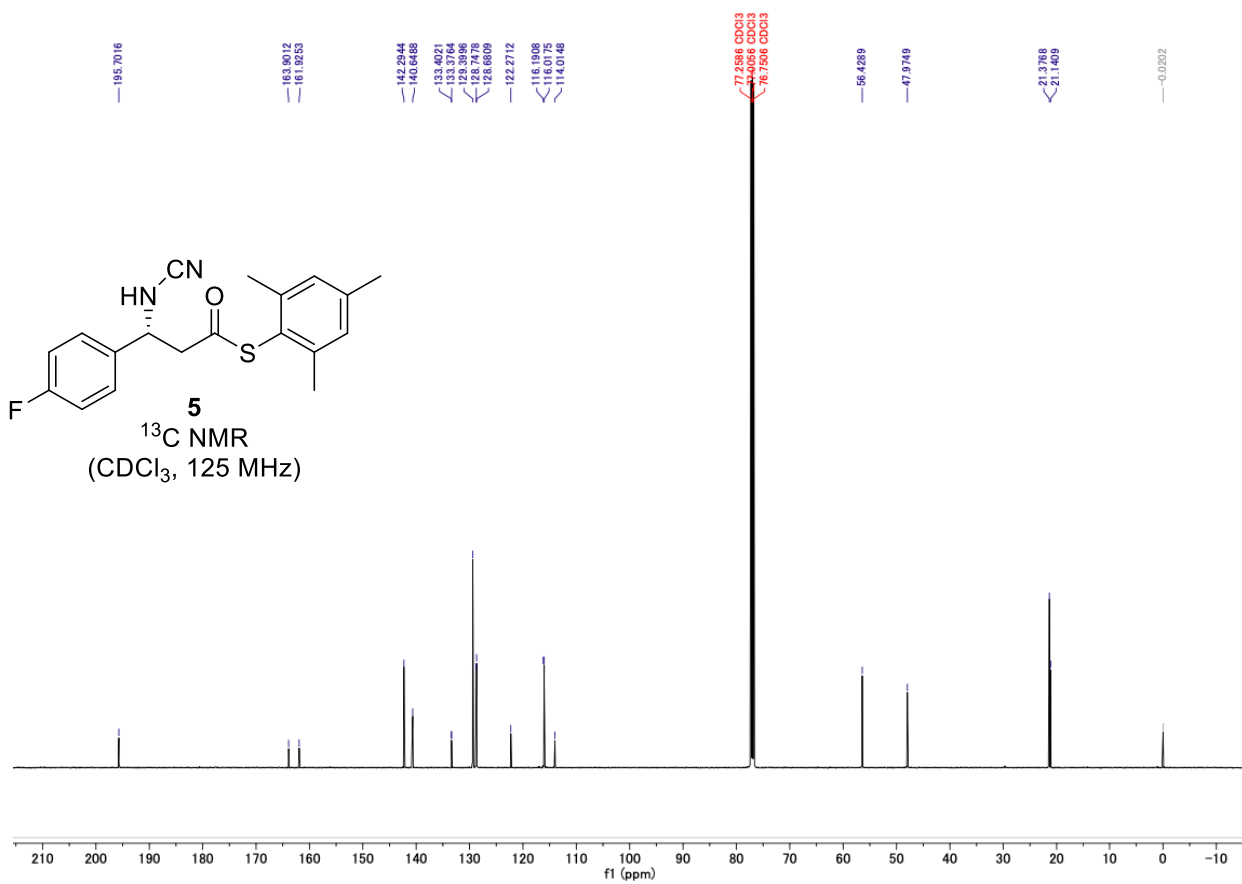

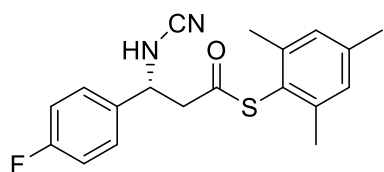

**5**  
<sup>19</sup>F NMR  
(CDCl<sub>3</sub>, 282 MHz)

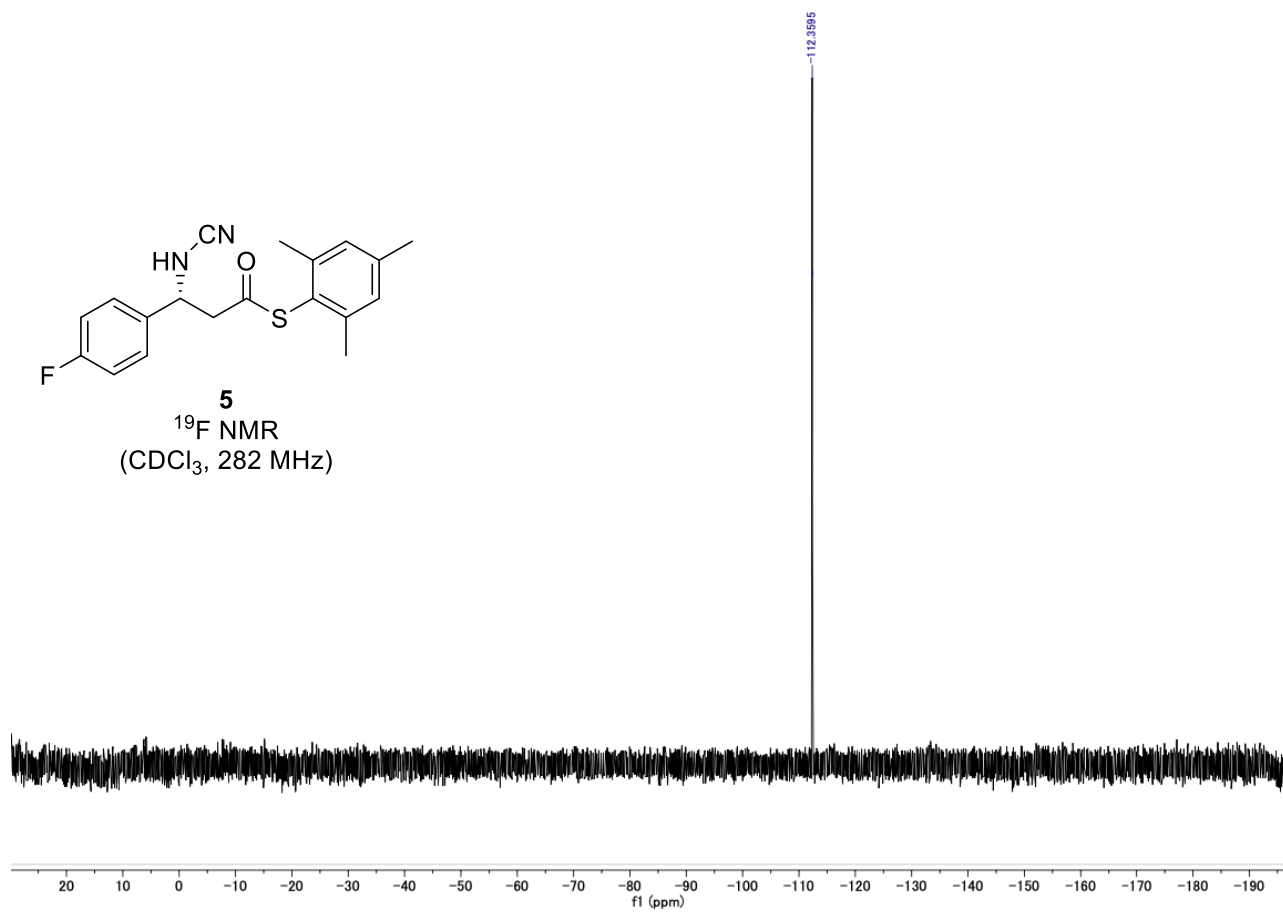

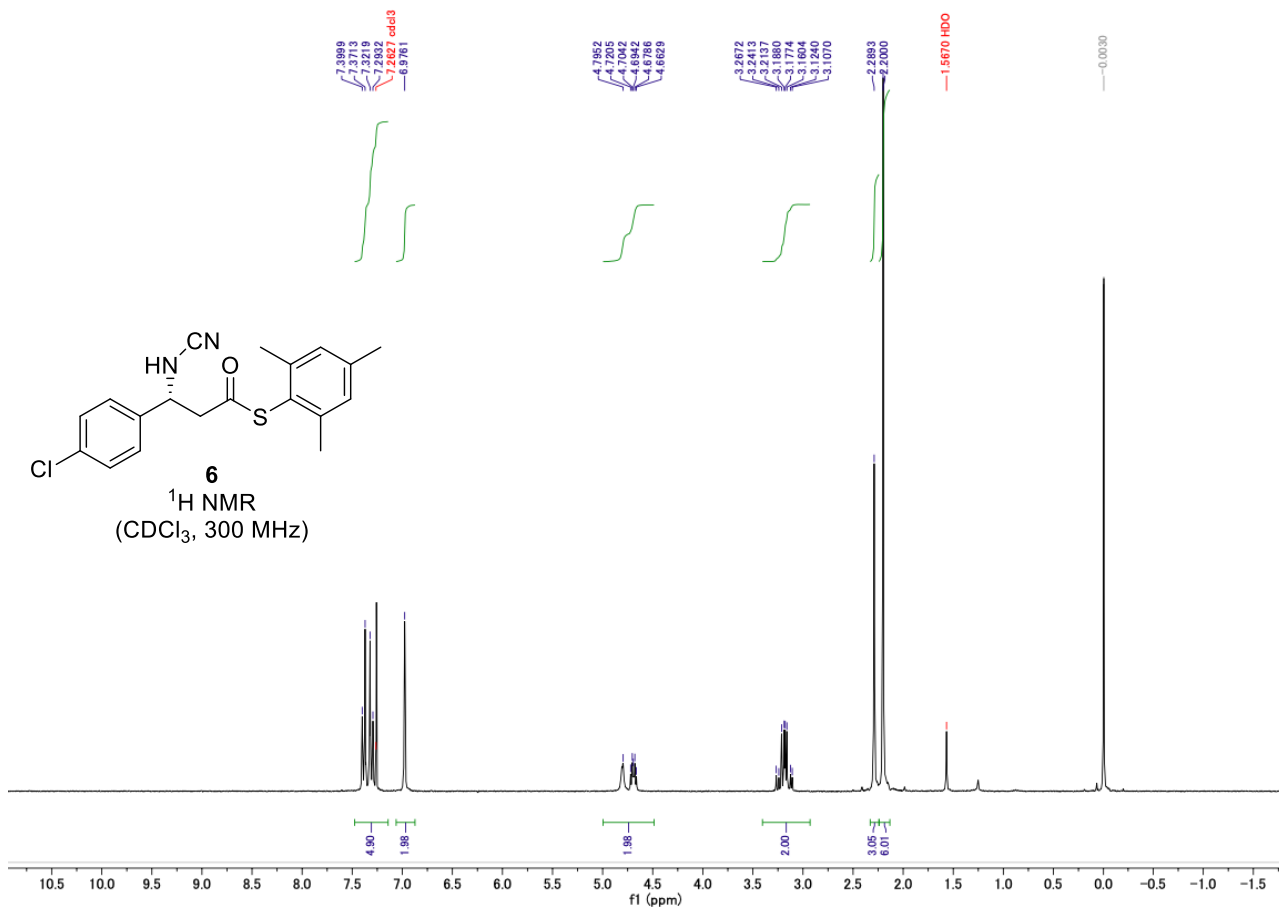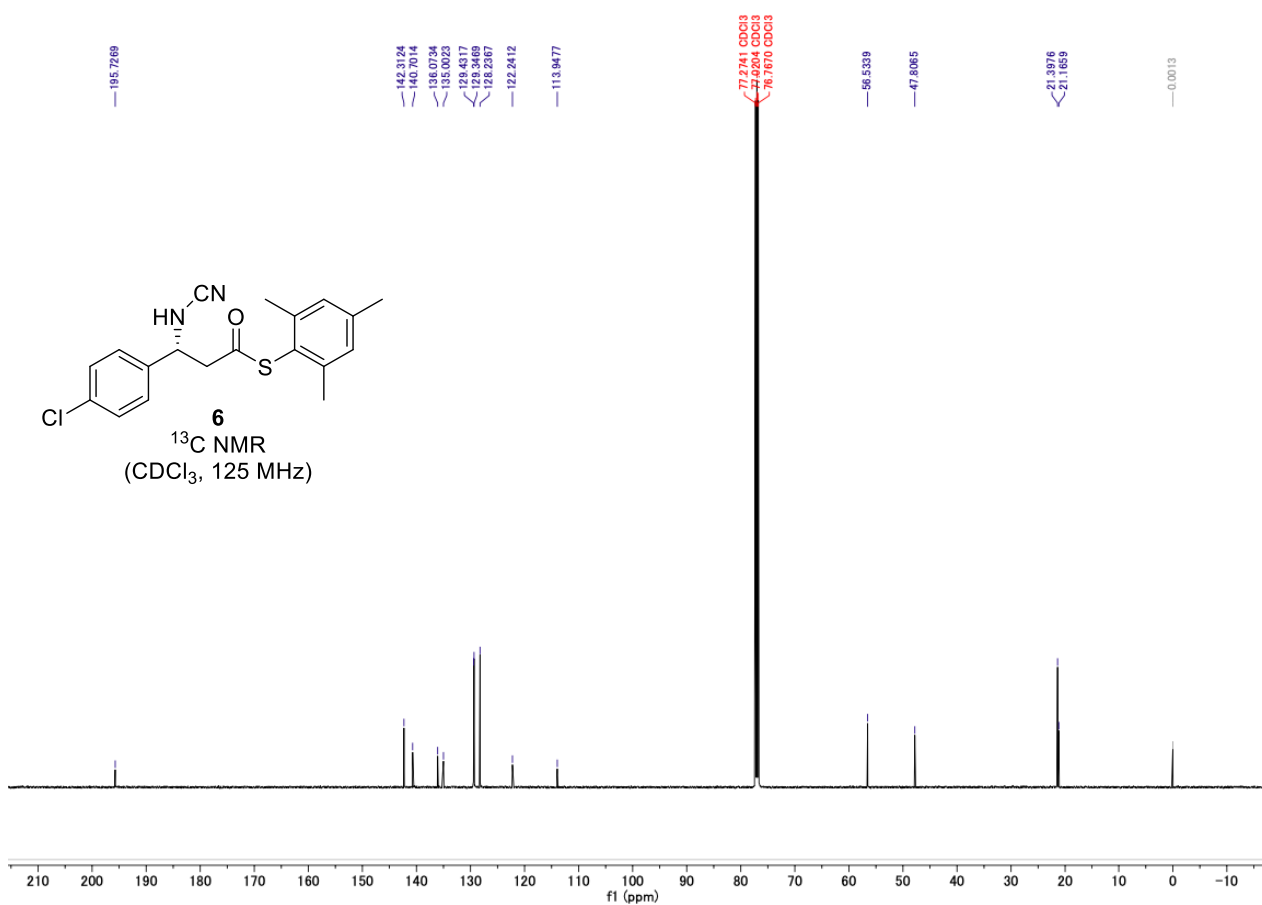

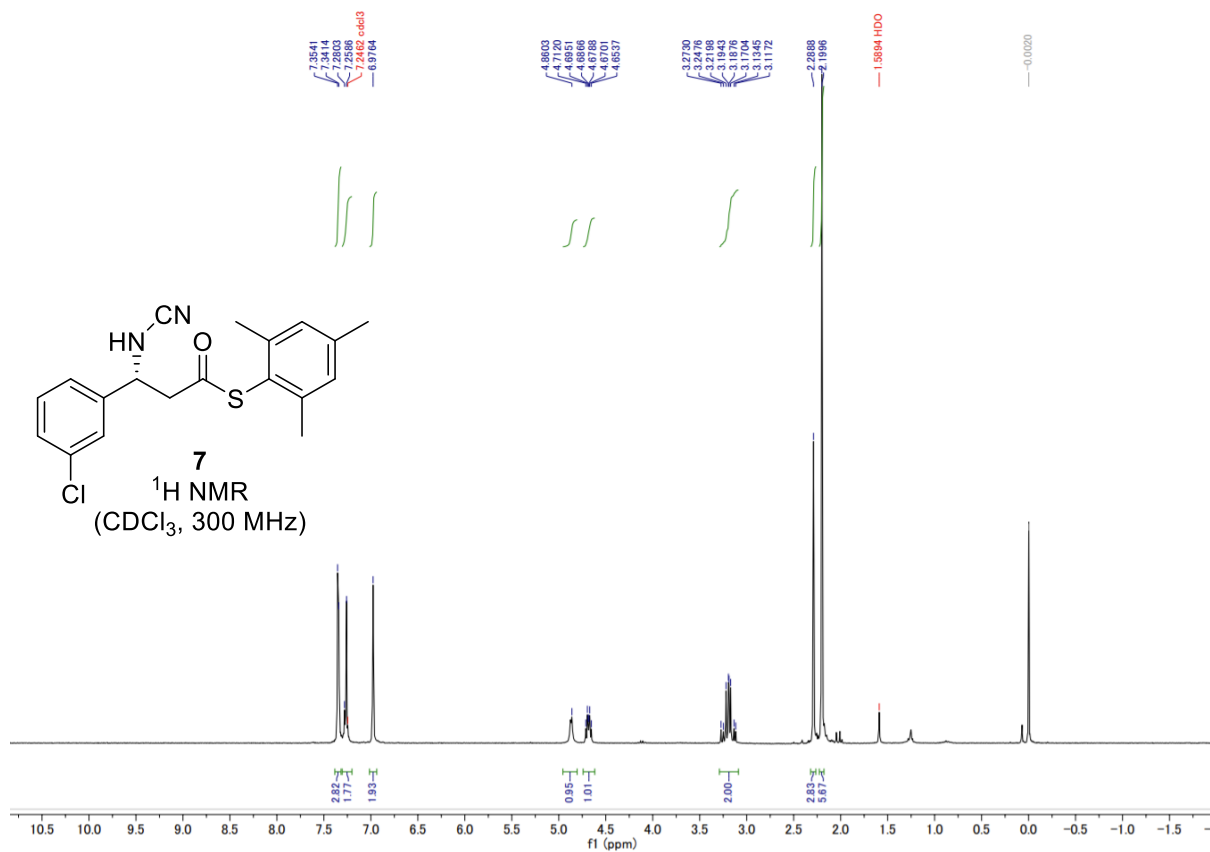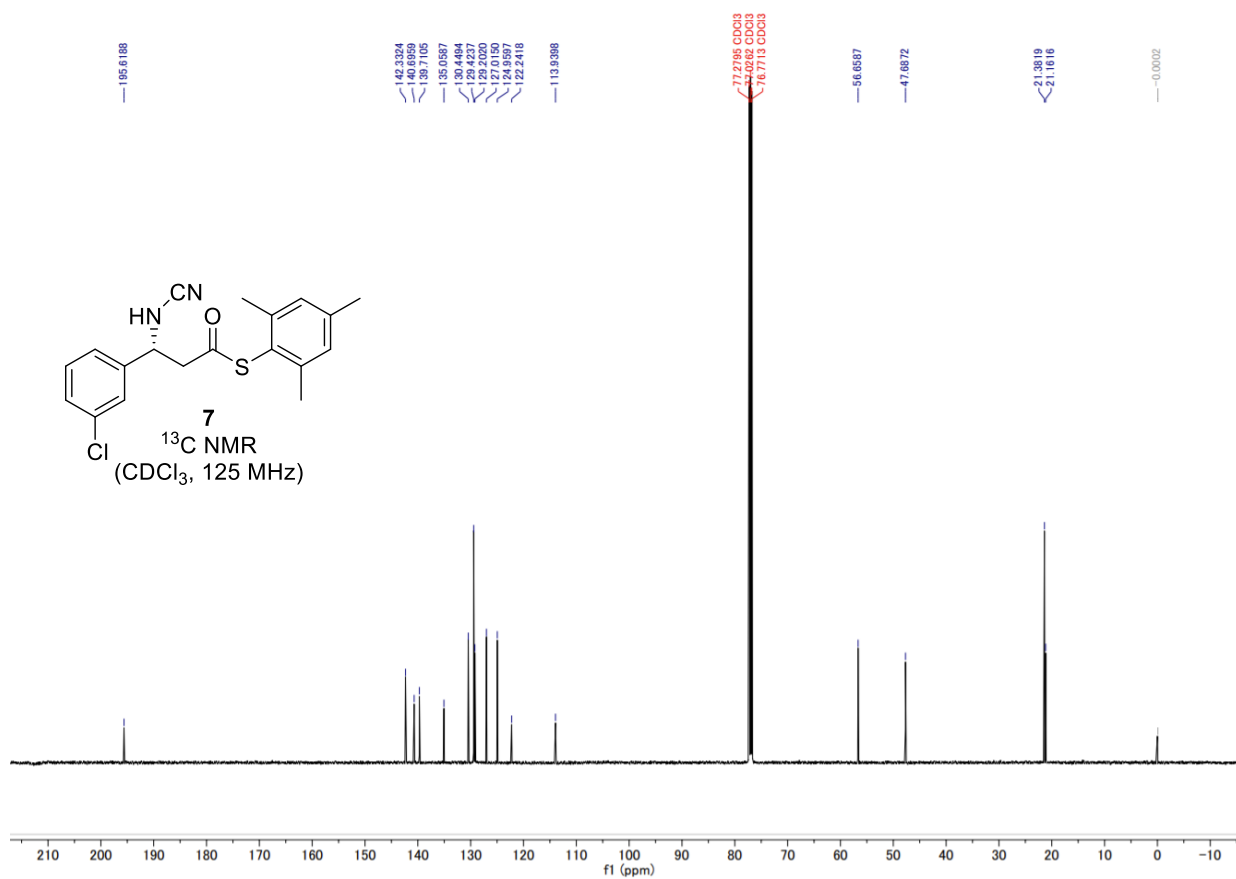

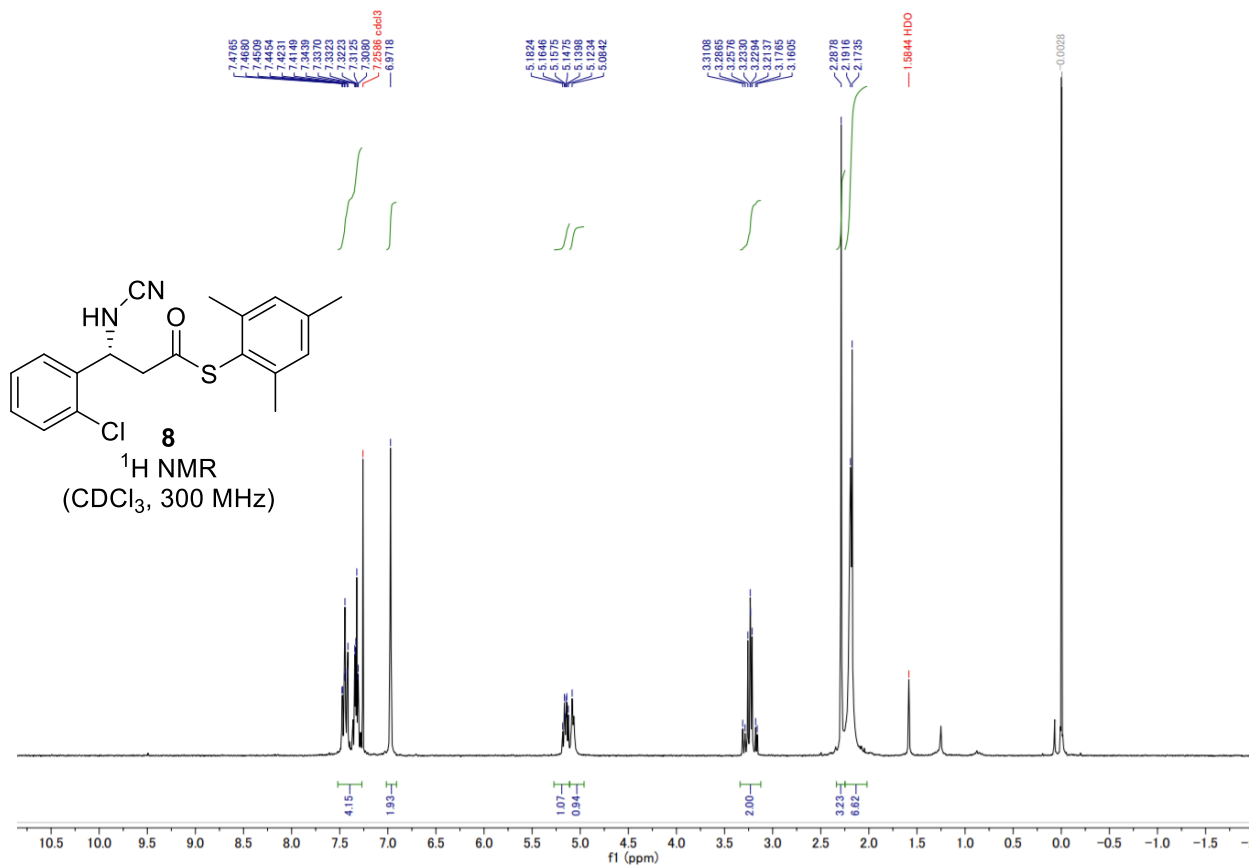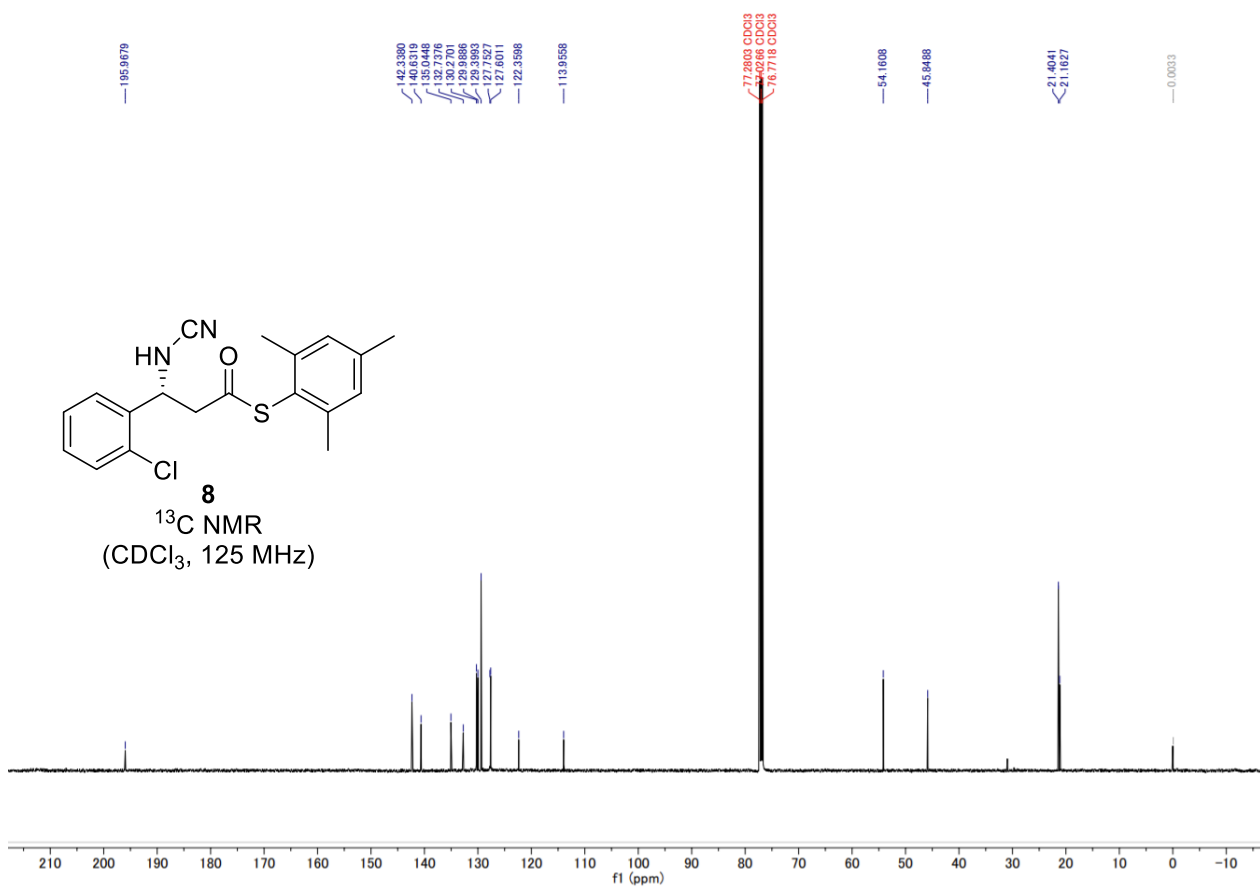

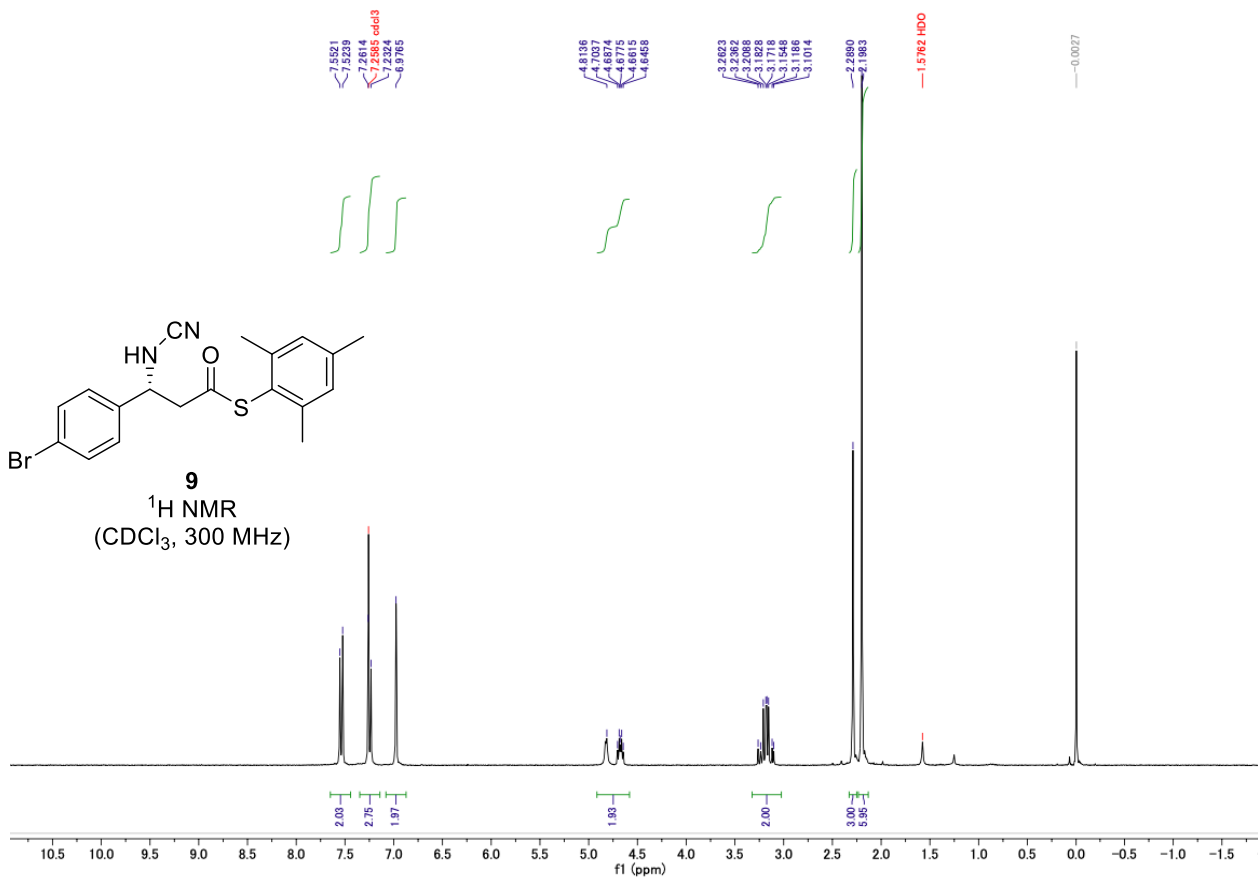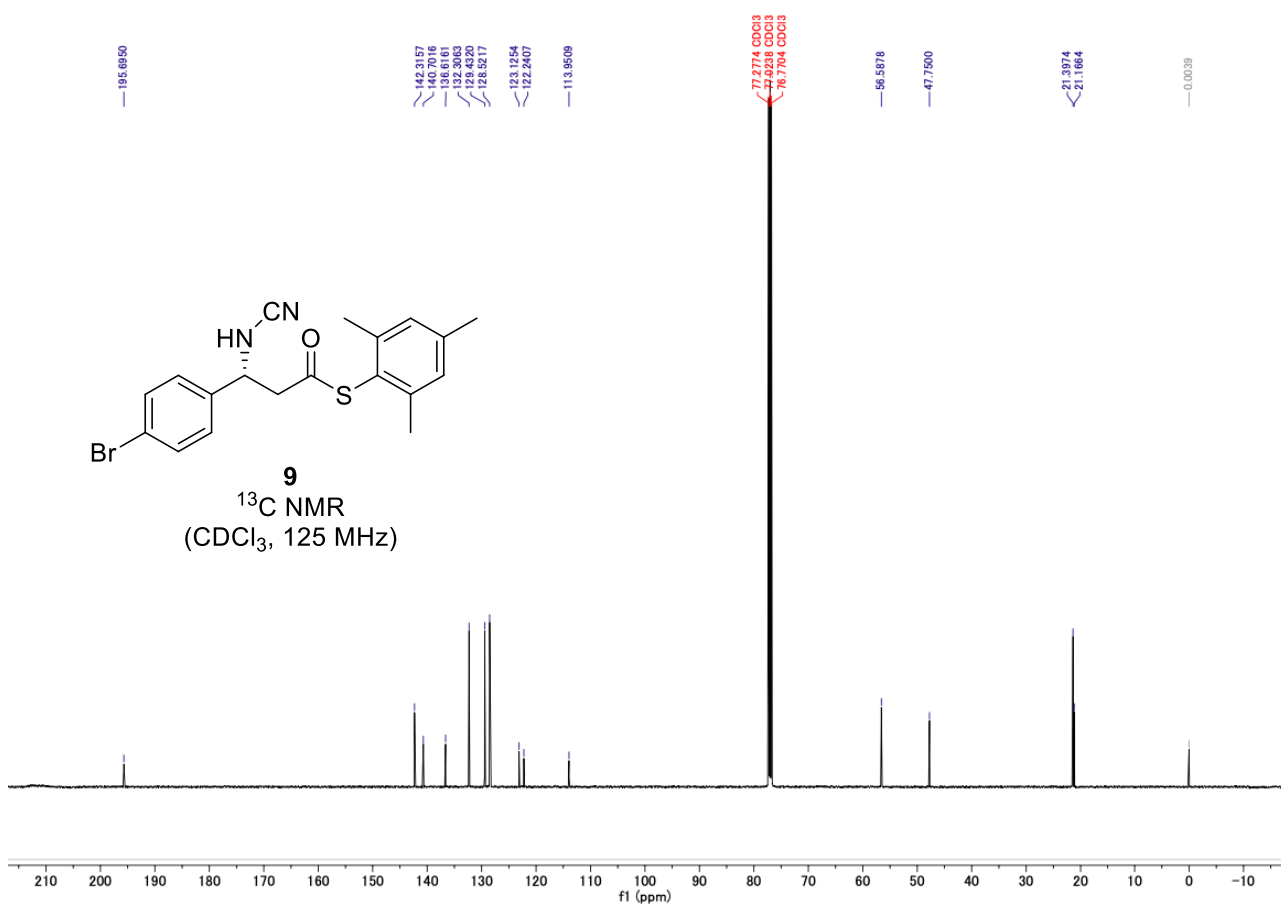

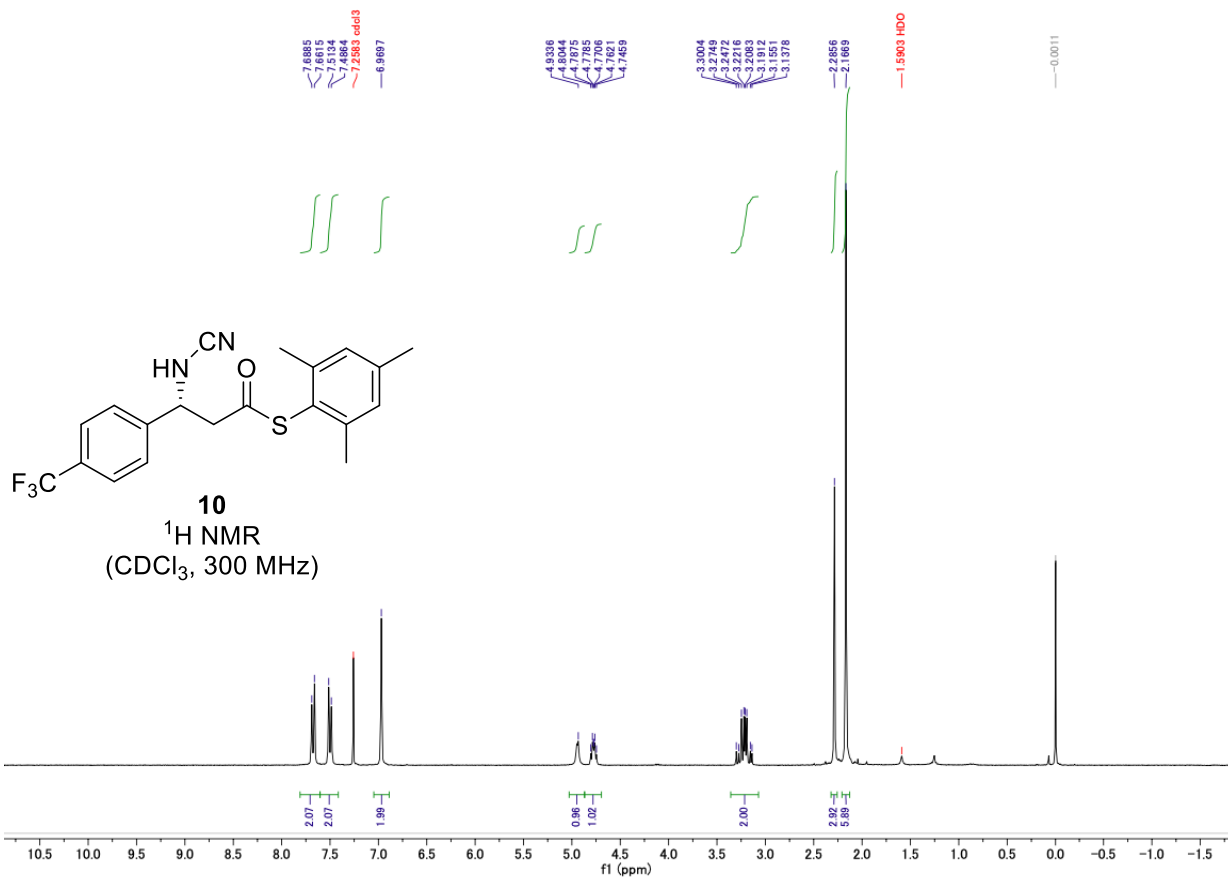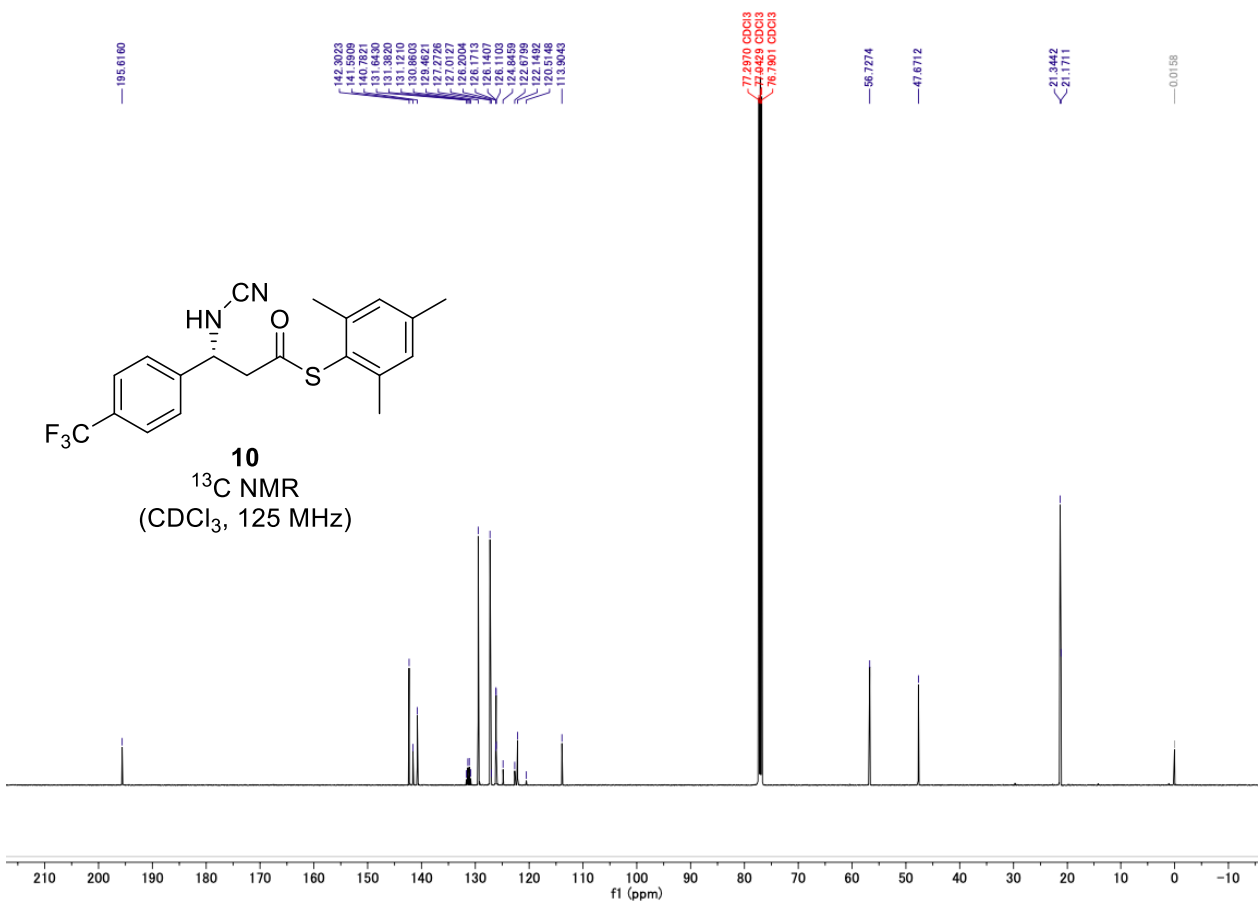



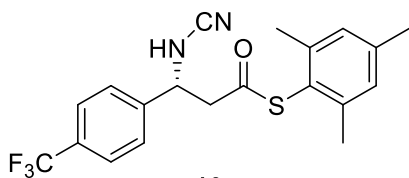

**10**  
<sup>19</sup>F NMR  
(CDCl<sub>3</sub>, 282 MHz)

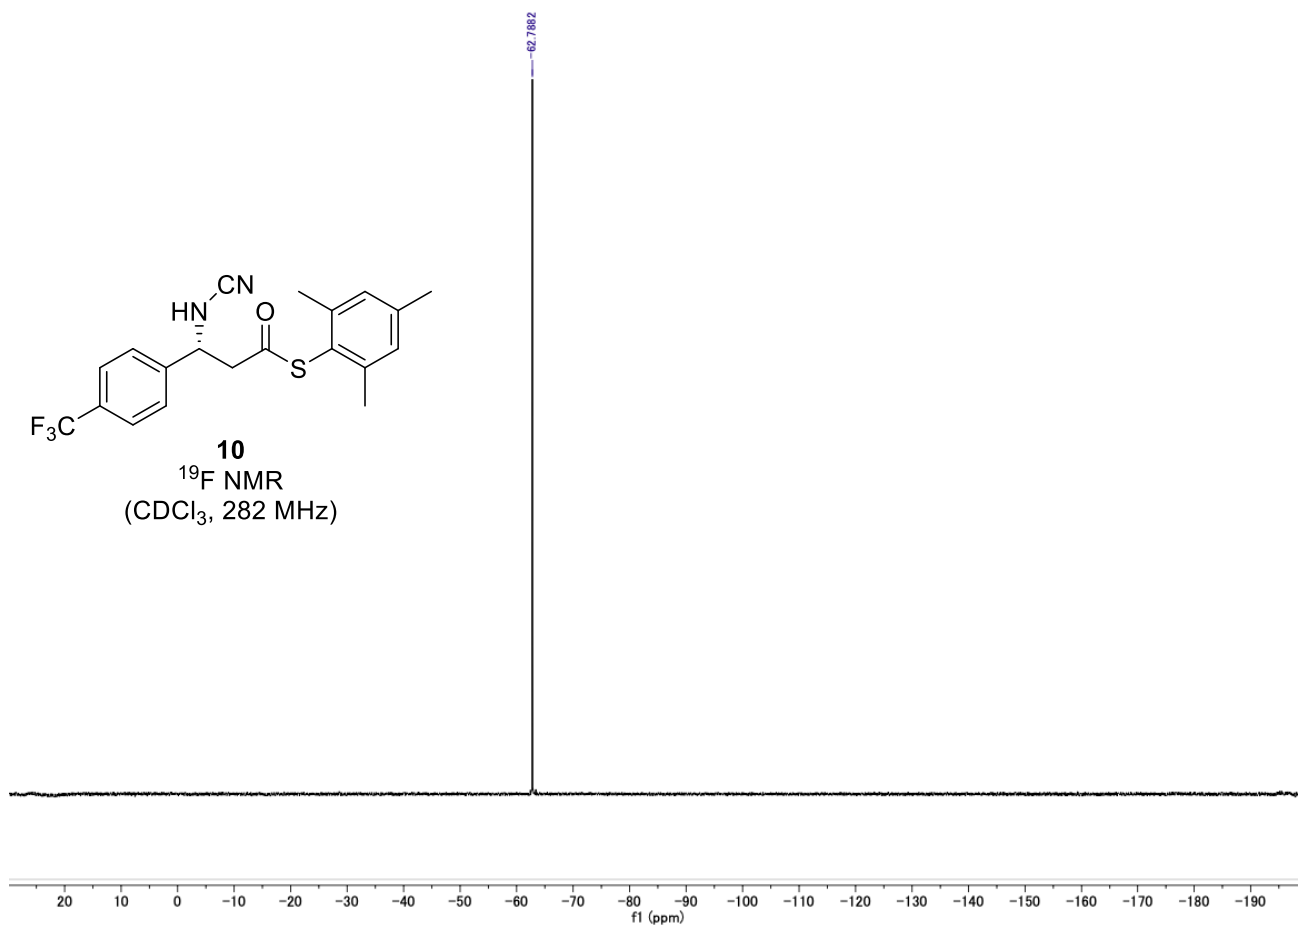

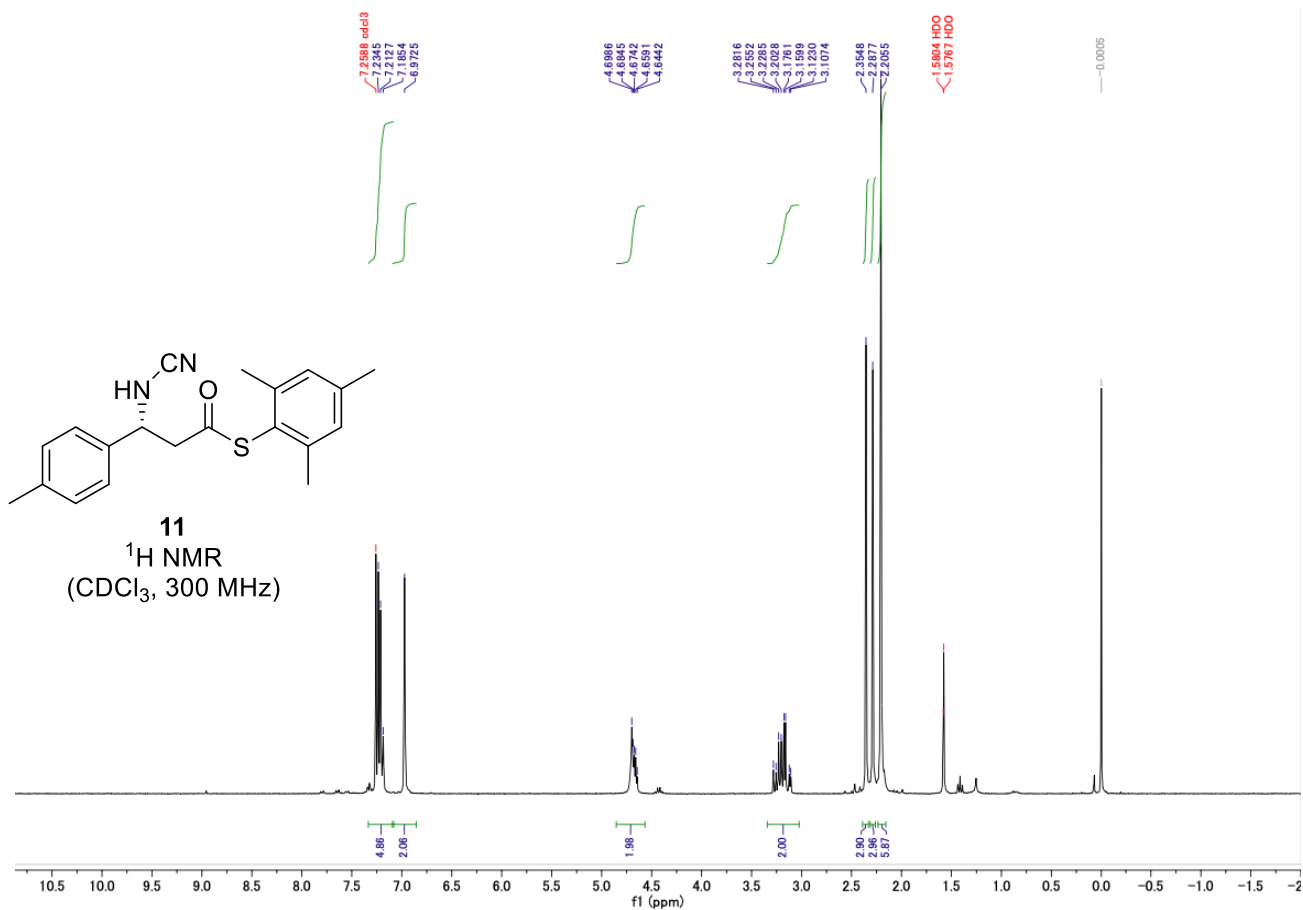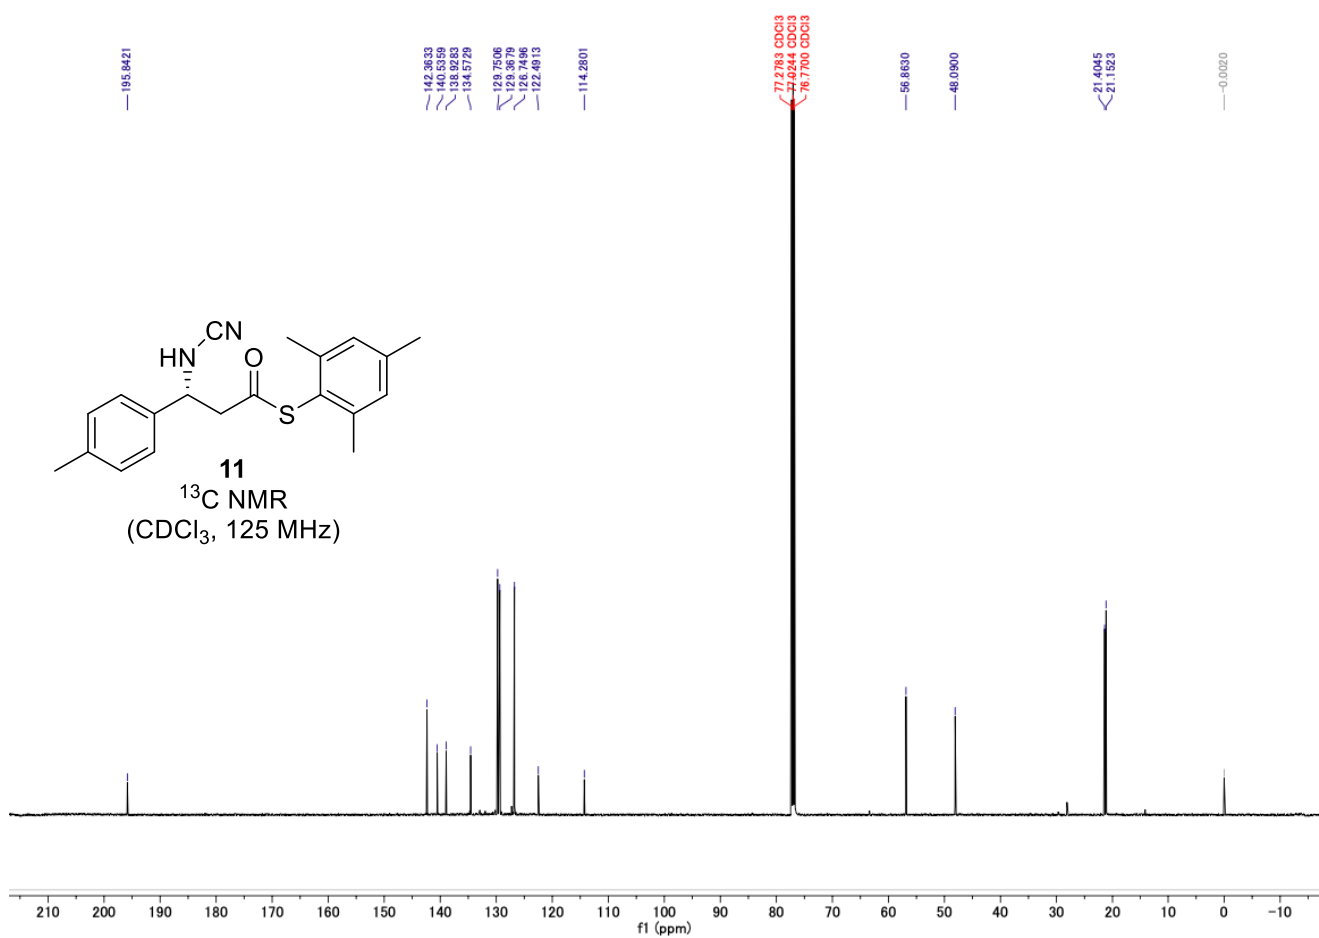

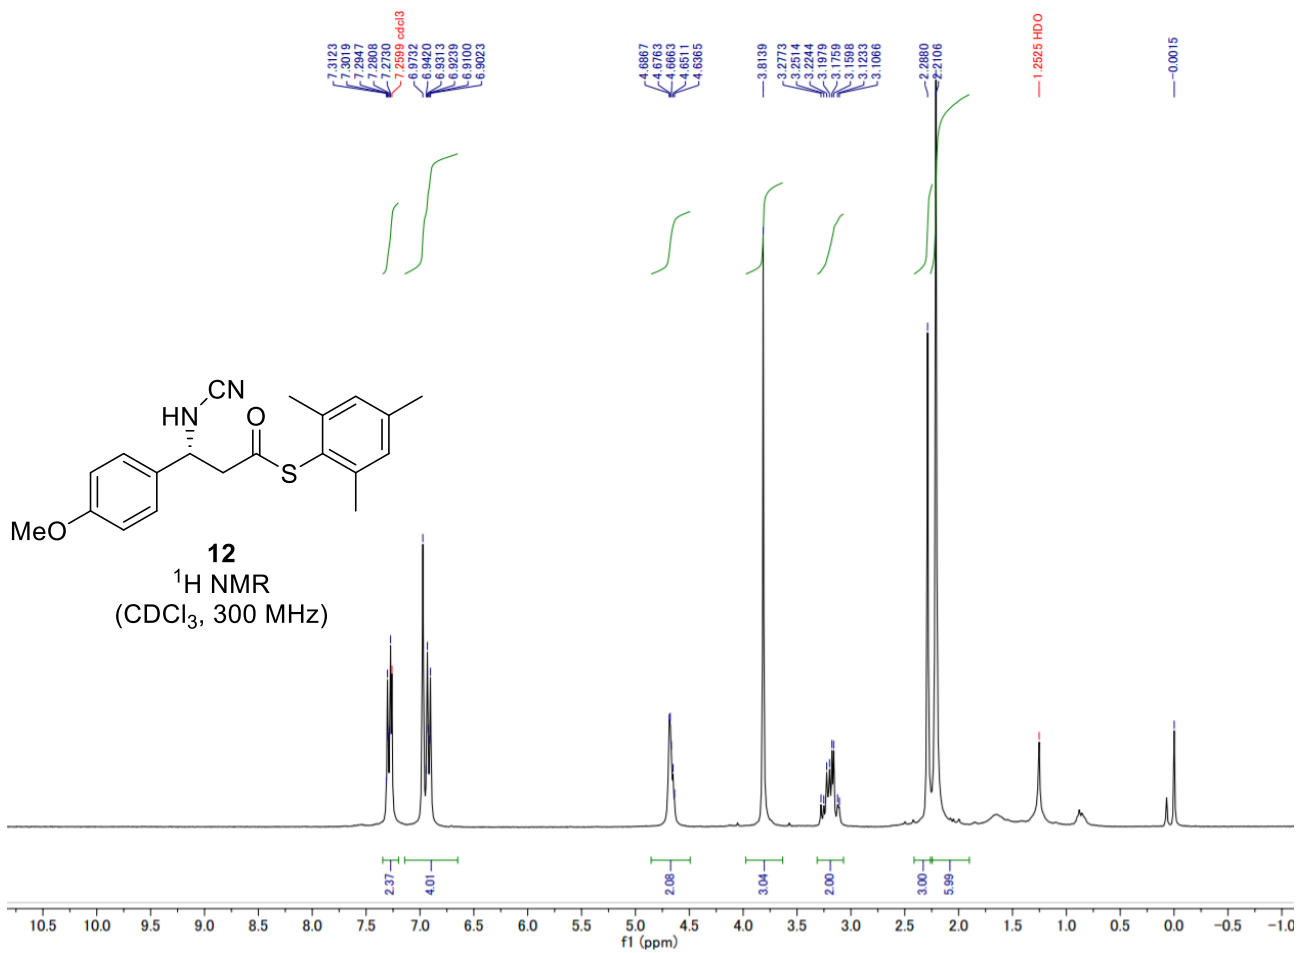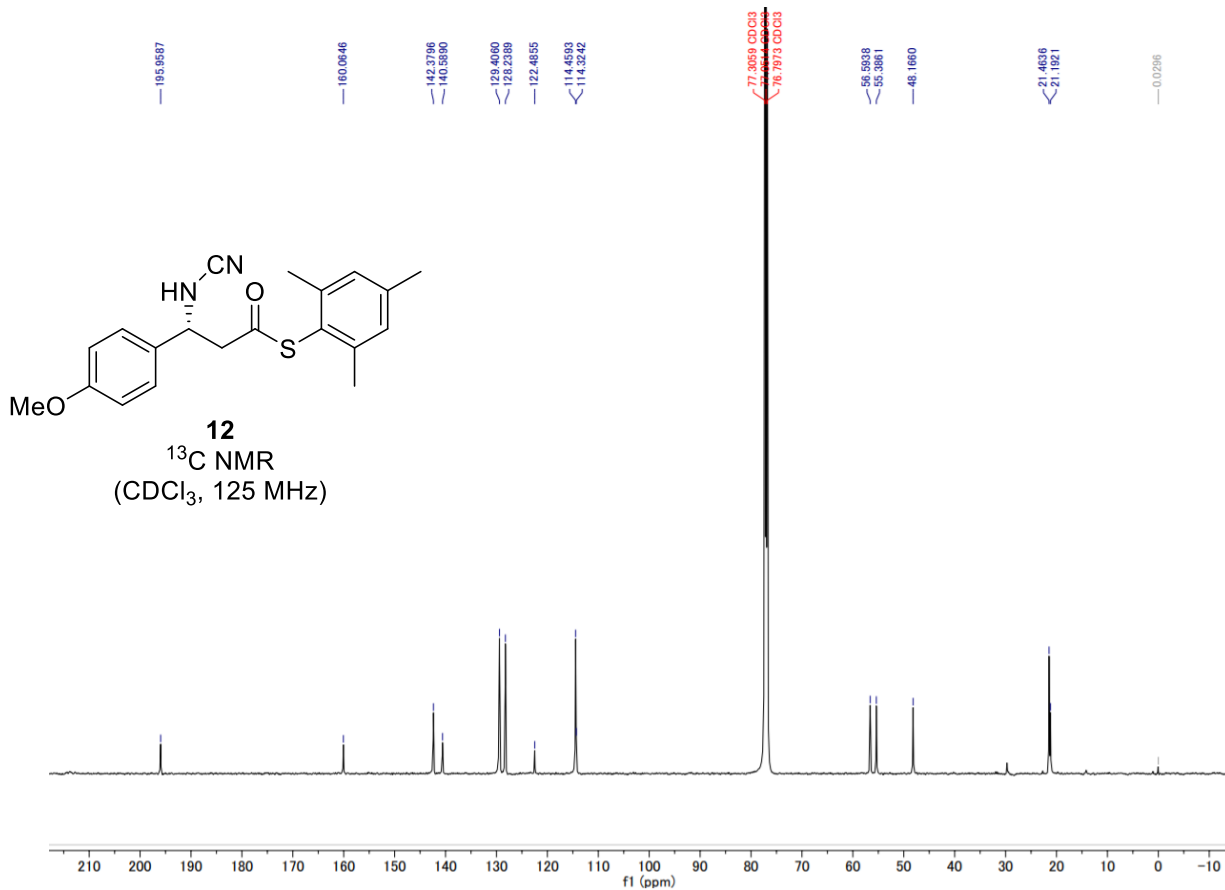

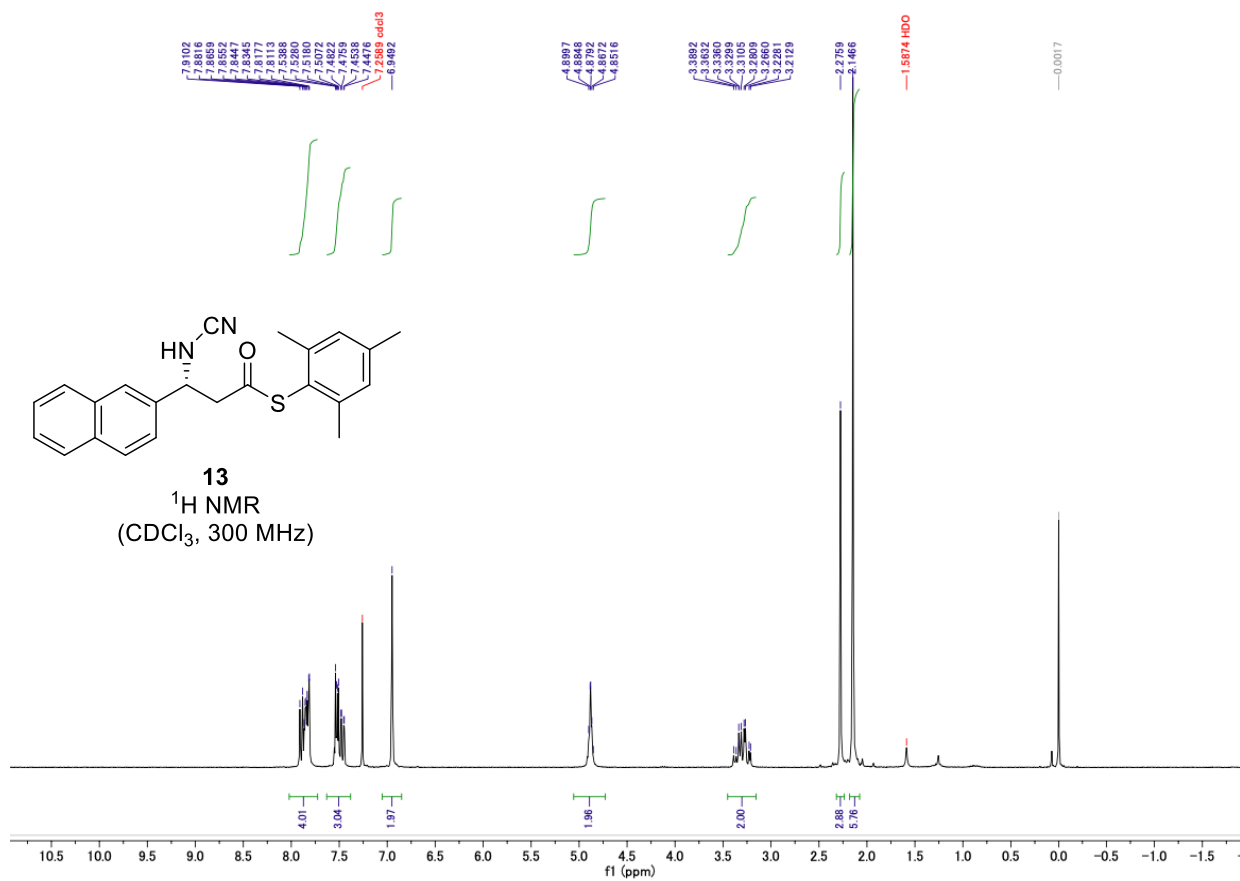

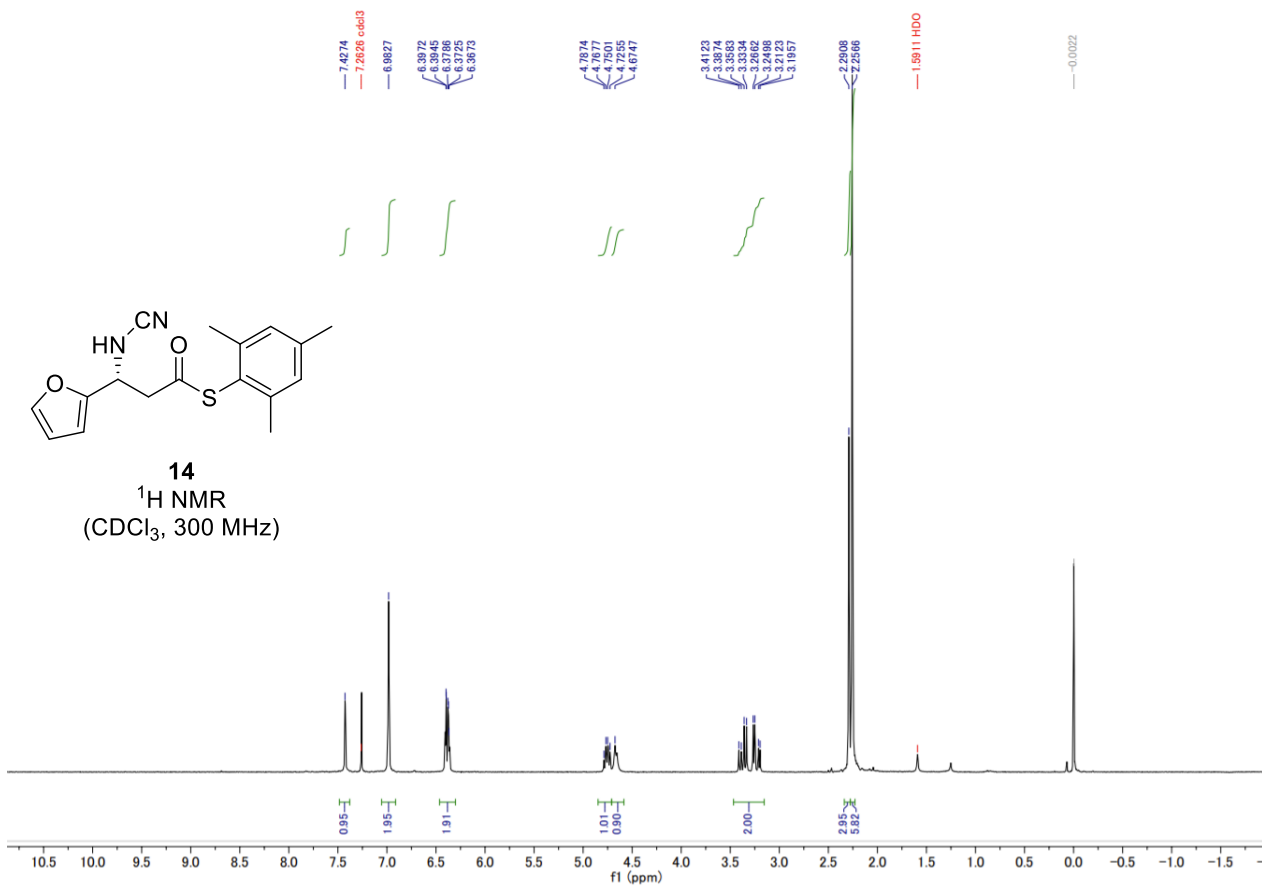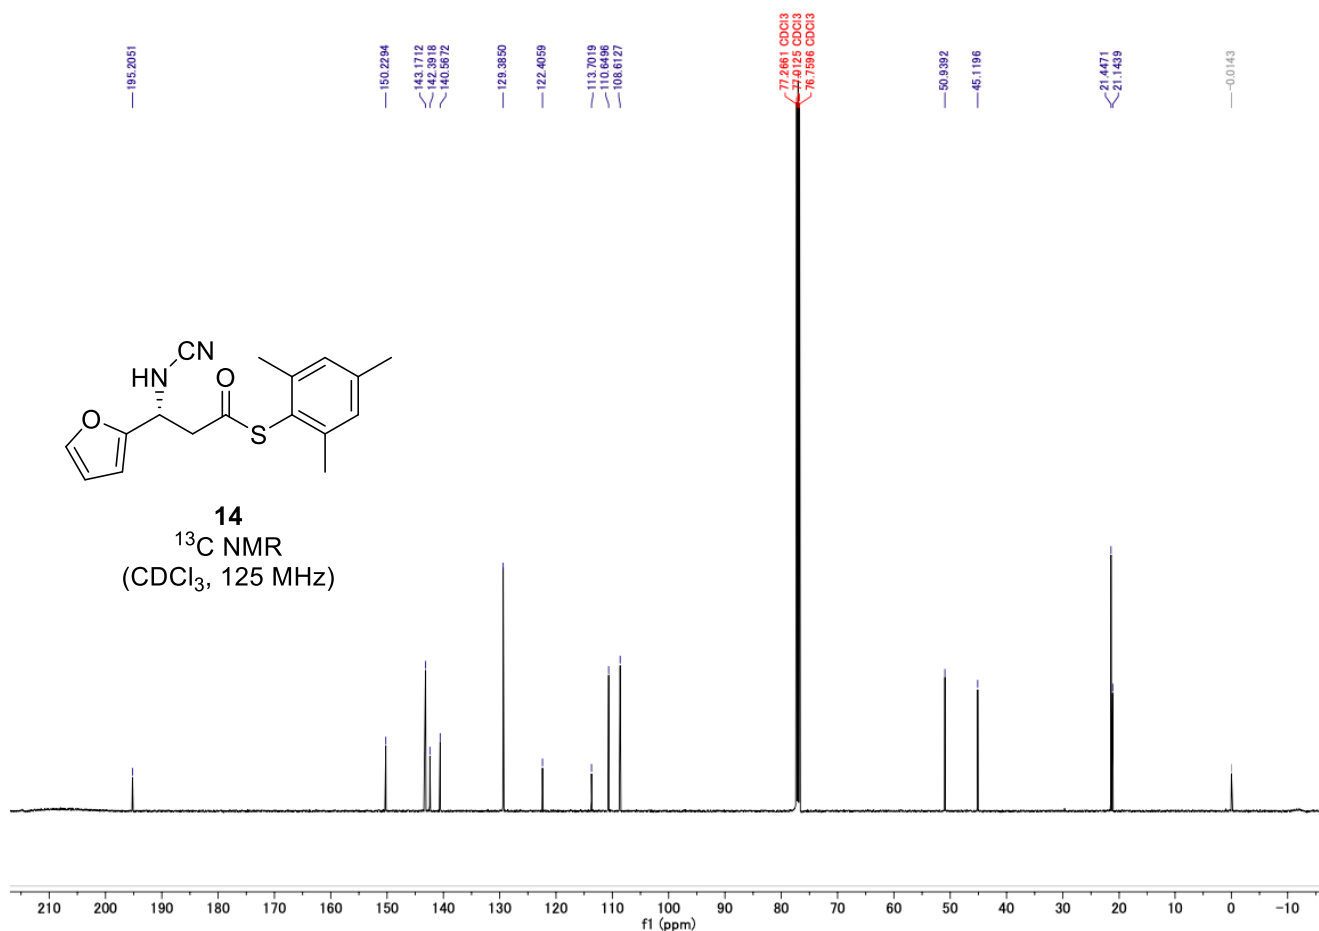

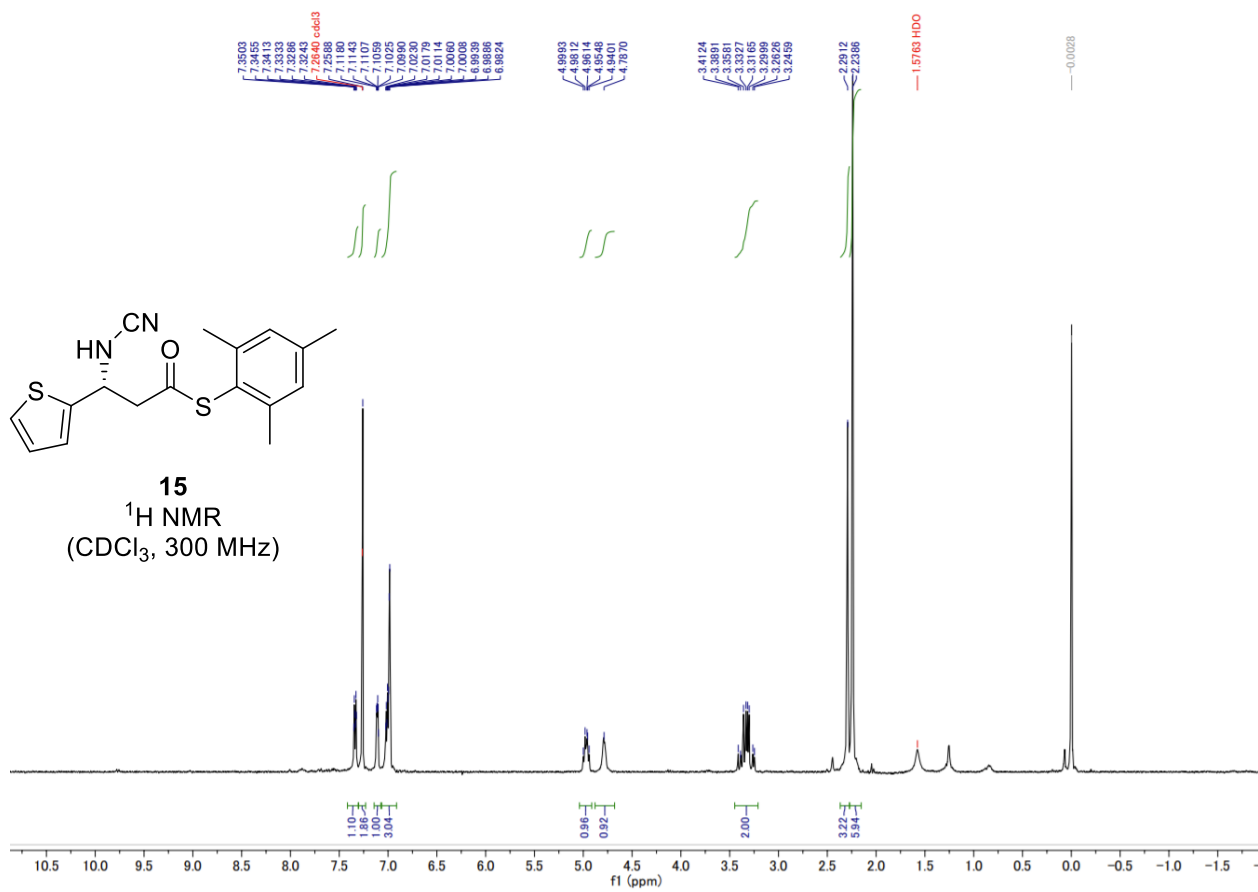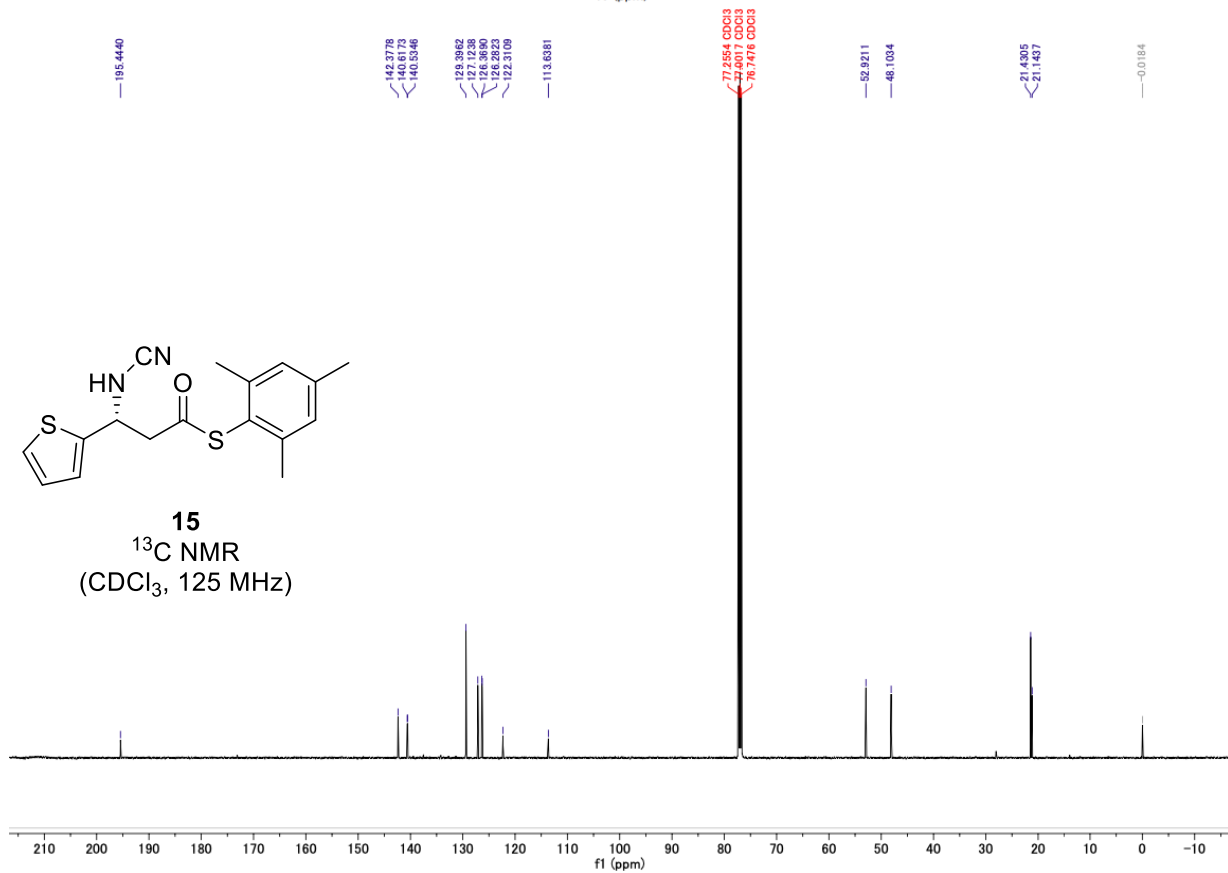

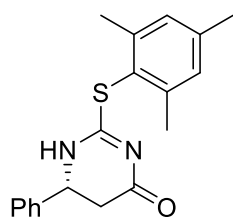

**16**  
<sup>1</sup>H NMR  
 (CDCl<sub>3</sub>, 300 MHz)

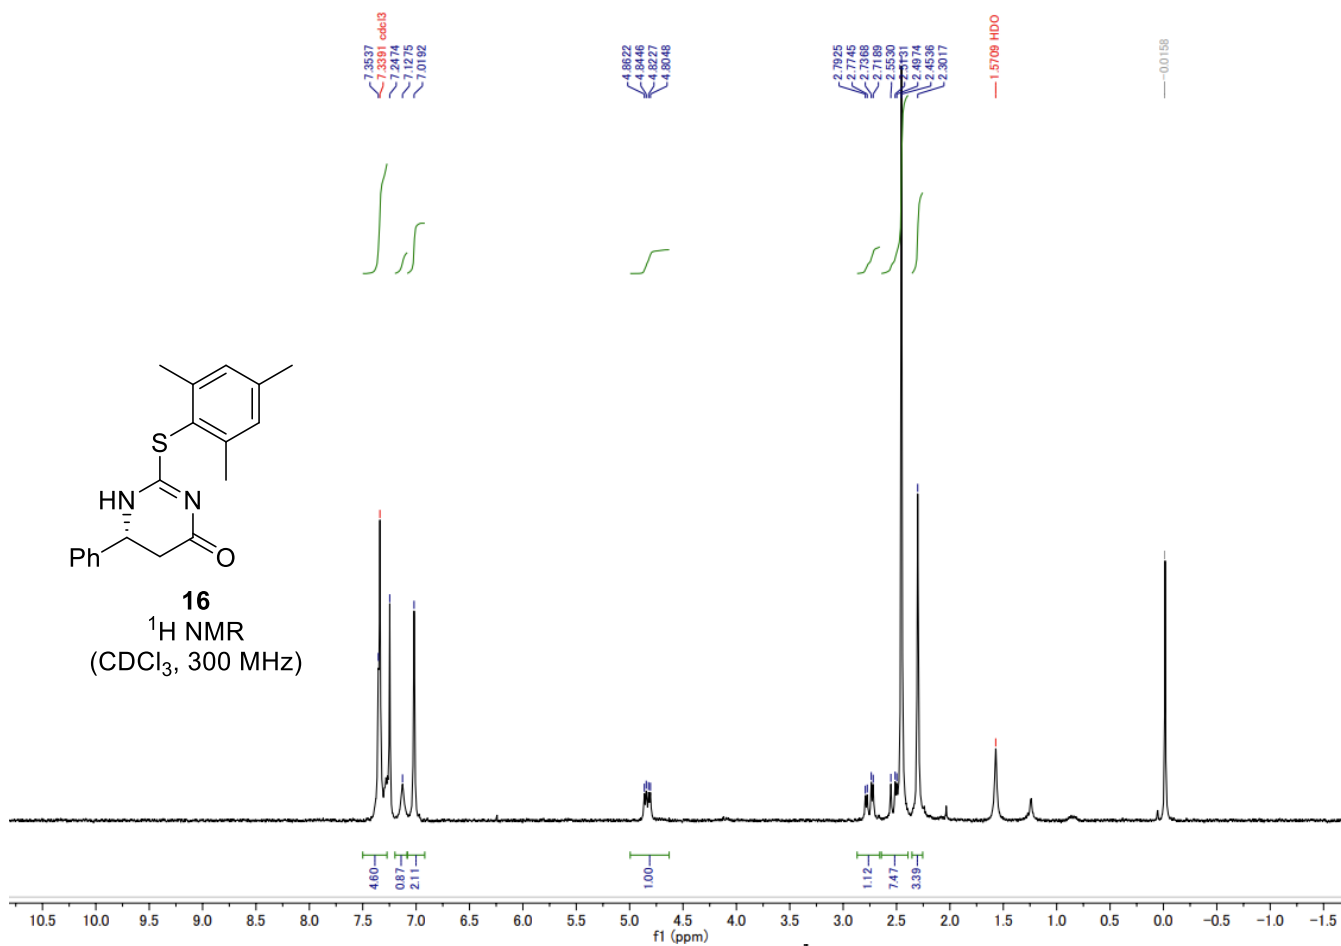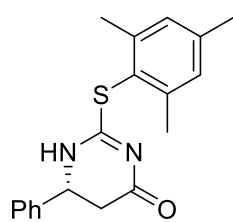

**16**  
<sup>13</sup>C NMR  
 (CDCl<sub>3</sub>, 125 MHz)

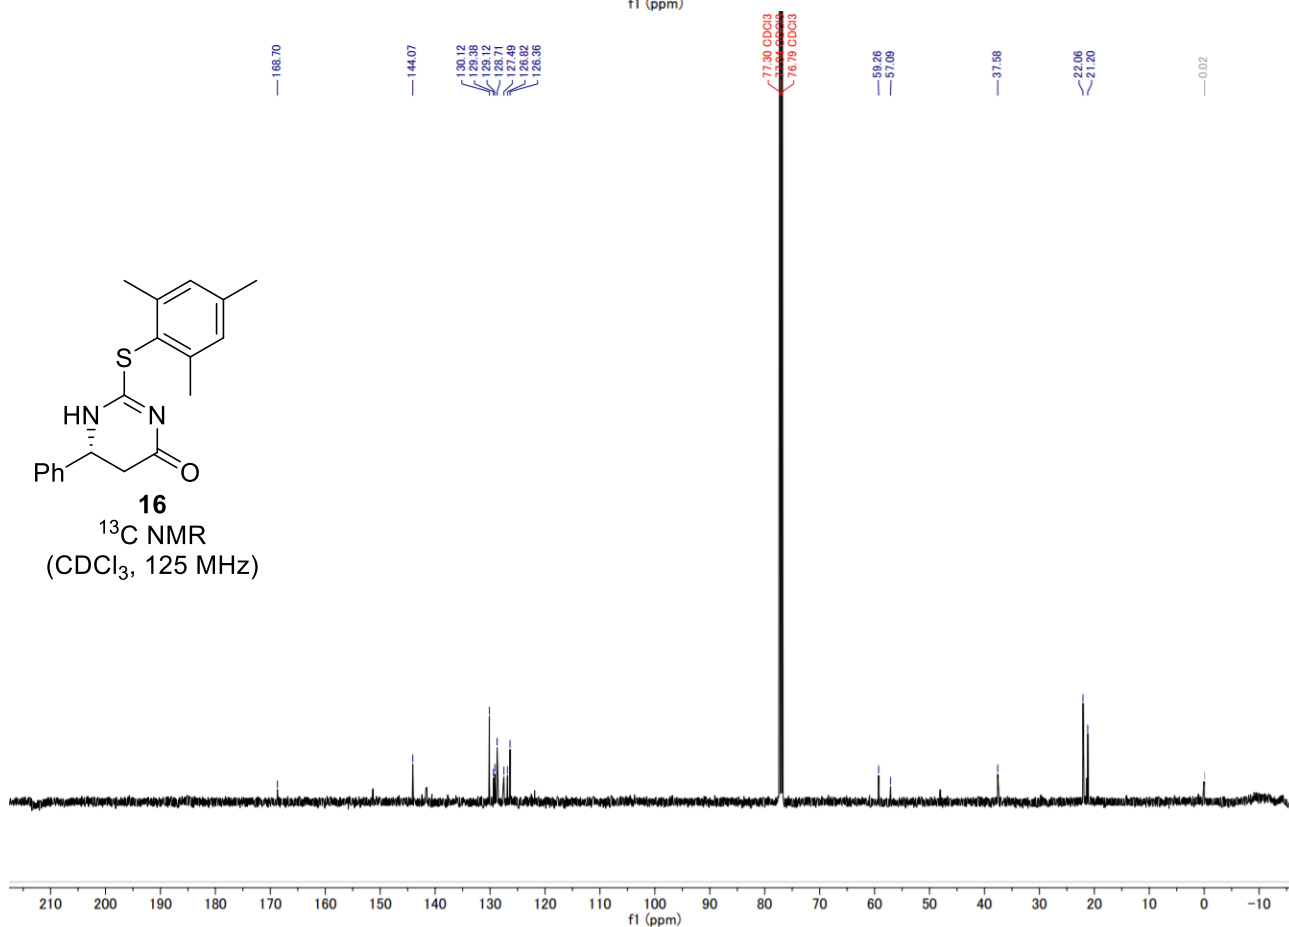

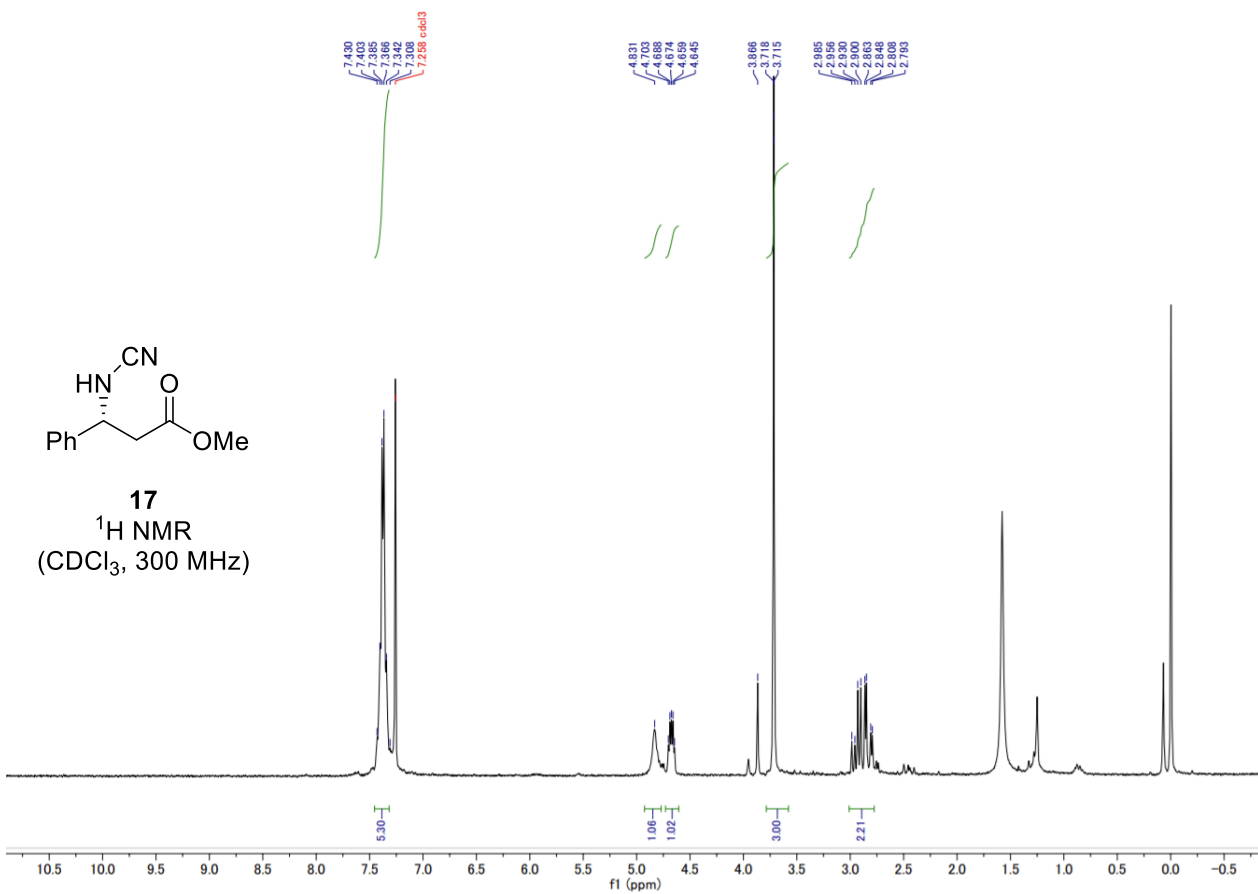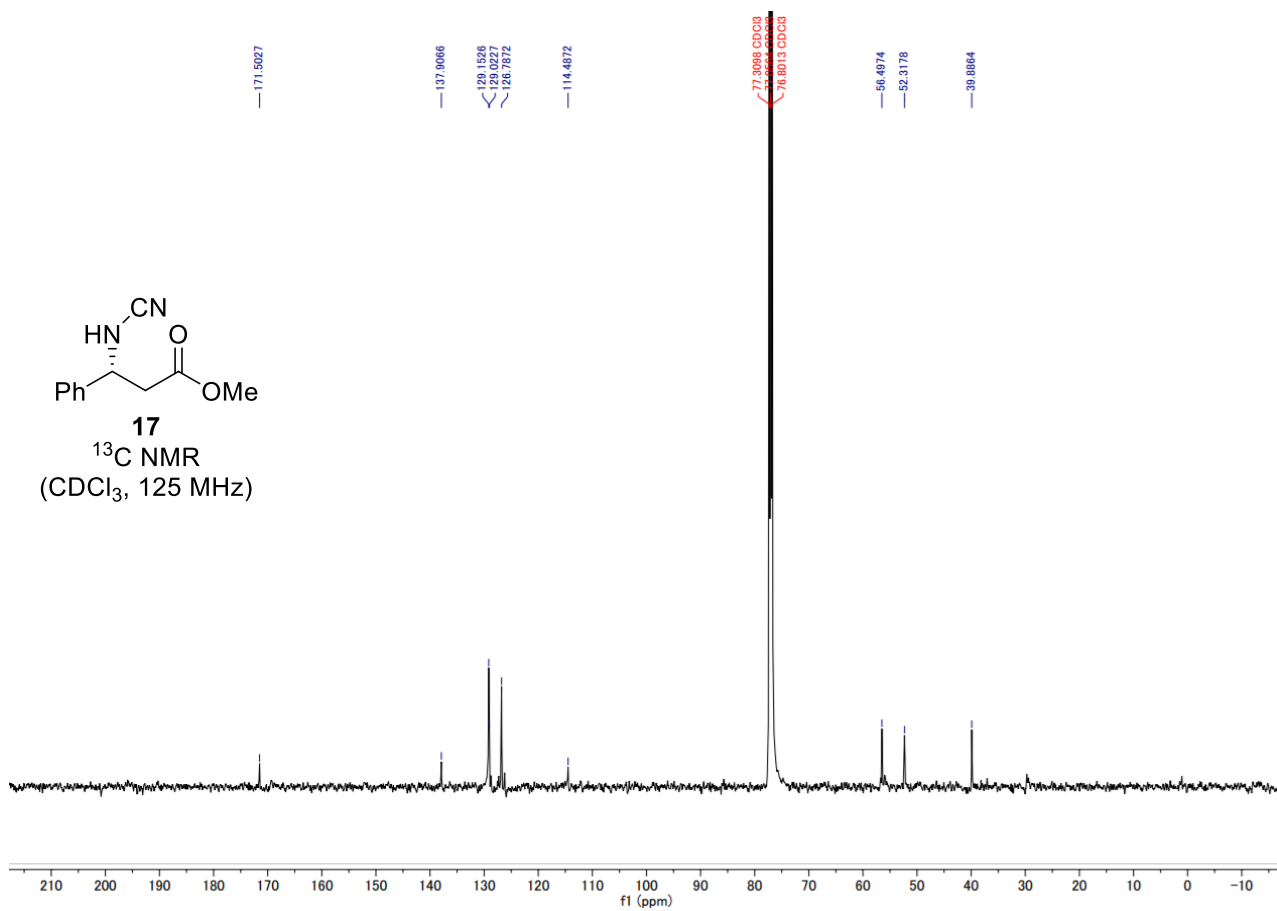



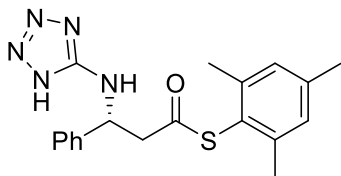

**18**  
<sup>1</sup>H NMR  
 ((CD<sub>3</sub>)<sub>2</sub>SO, 300 MHz)

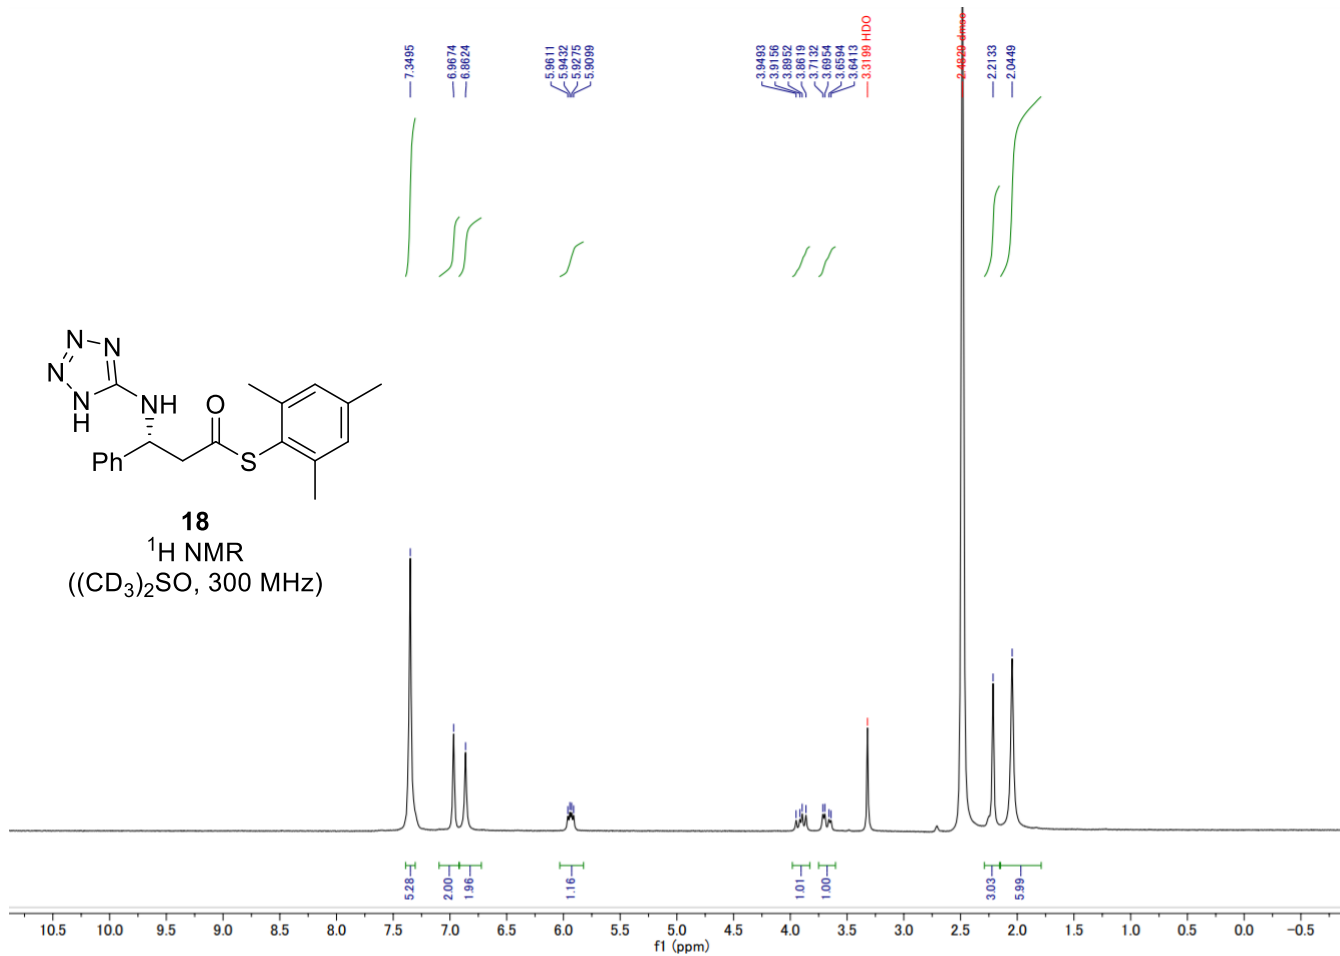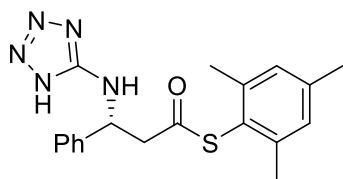

**18**  
<sup>13</sup>C NMR  
 ((CD<sub>3</sub>)<sub>2</sub>SO, 125 MHz)

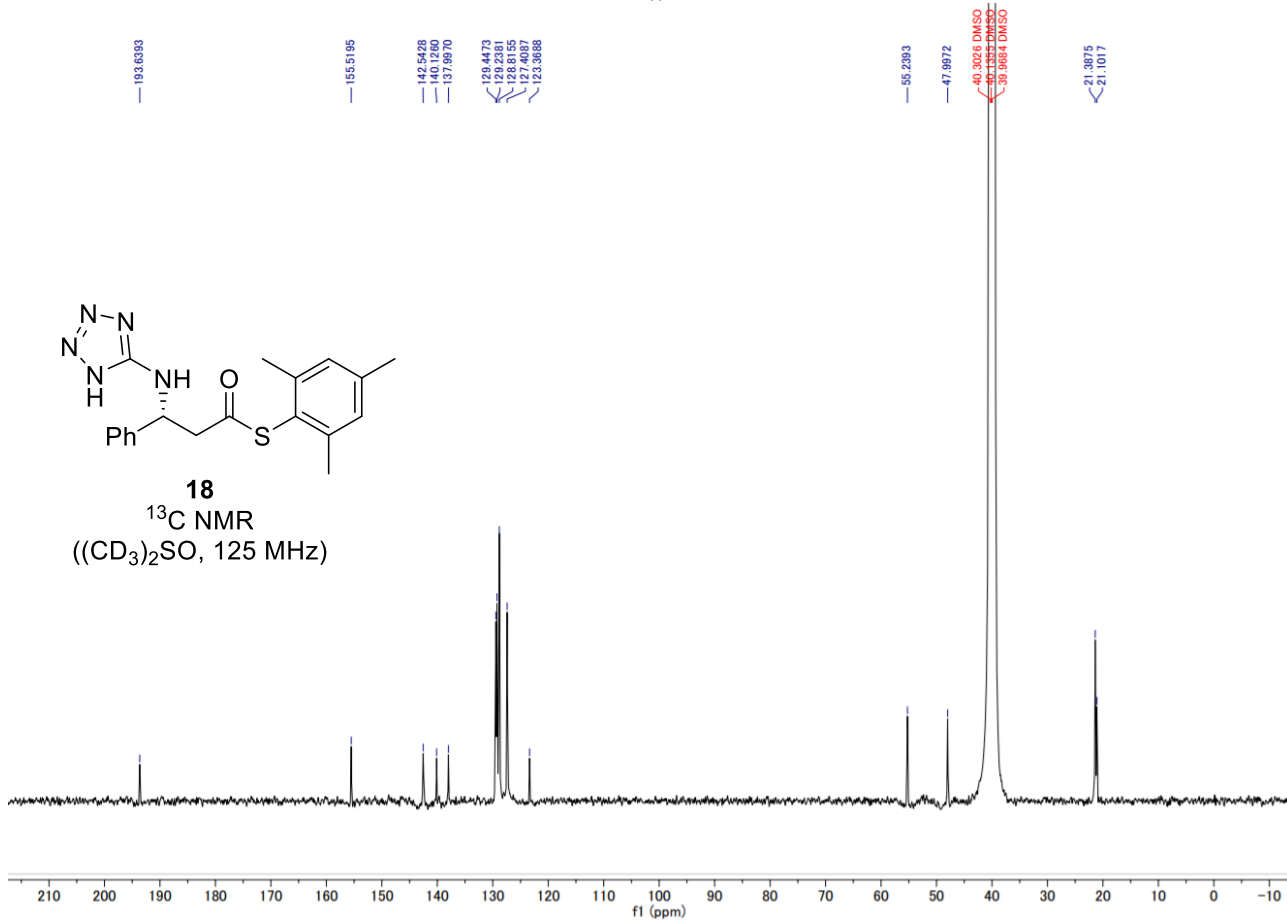

## HPLC analysis

### (*R*)-*S*-Phenyl 3-phenyl-3-(cyanoamino)propanethioate (4aa)

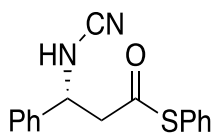

#### racemic-4aa

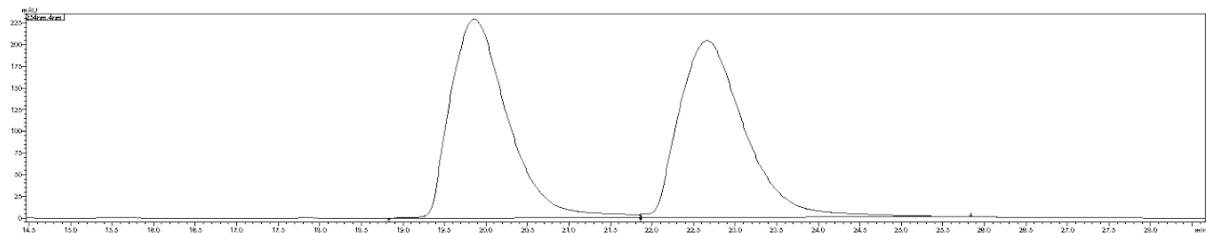

#### (*R*)-4aa

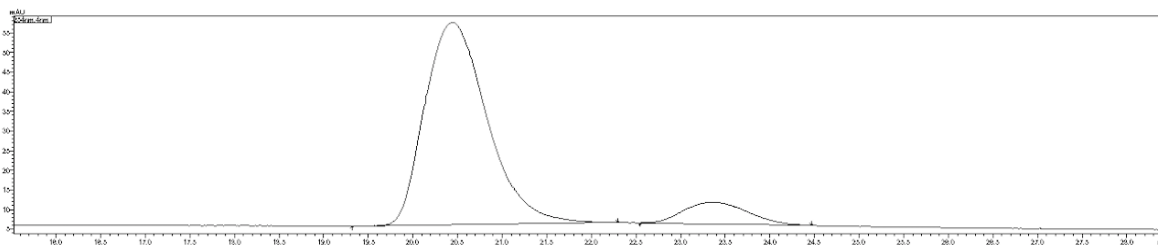

#### racemic-4aa

| Peak | tR (min) | Area (%) |
|------|----------|----------|
| 1    | 19.9     | 49.8     |
| 2    | 22.6     | 50.2     |

#### (*R*)-4aa

| Peak | tR (min) | Area (%) |
|------|----------|----------|
| 1    | 20.4     | 90.1     |
| 2    | 23.3     | 9.9      |

**(S)-S-Phenyl 3-phenyl-3-(tosylamino)propanethioate (4ba)**

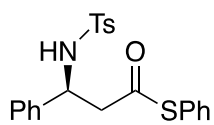

racemic-**4ba**

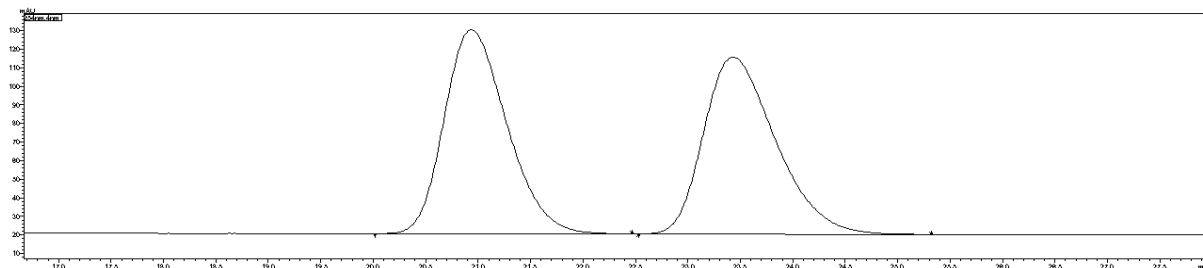

**(S)-4ba**

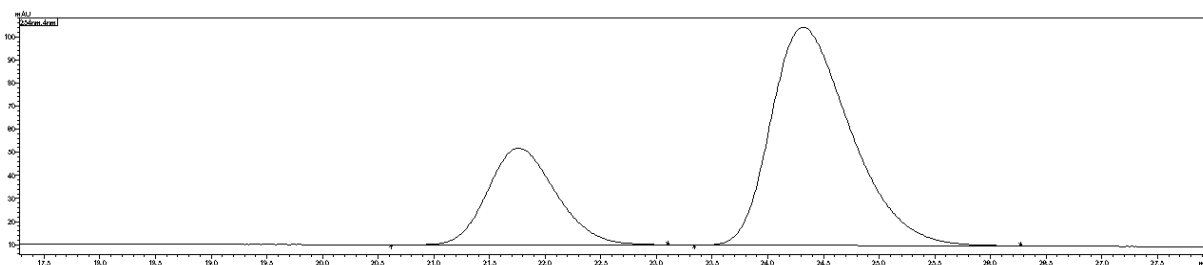

racemic-**4ba**

**(R)-4ba**

| Peak | tR (min) | Area (%) |
|------|----------|----------|
| 1    | 21.0     | 50.0     |
| 2    | 23.5     | 50.0     |

| Peak | tR (min) | Area (%) |
|------|----------|----------|
| 1    | 21.7     | 27.5     |
| 2    | 24.3     | 72.5     |

**(R)-S-(4-Bromophenyl) 3-phenyl-3-(cyanoamino)propanethioate (4ab)**

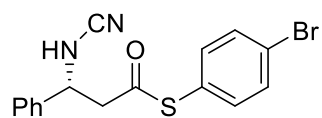

racemic-**4ab**

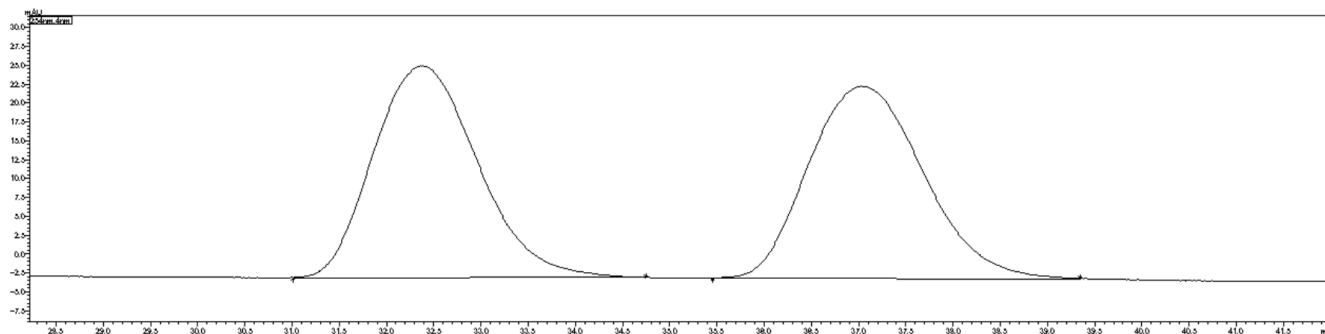

**(S)-4ab**

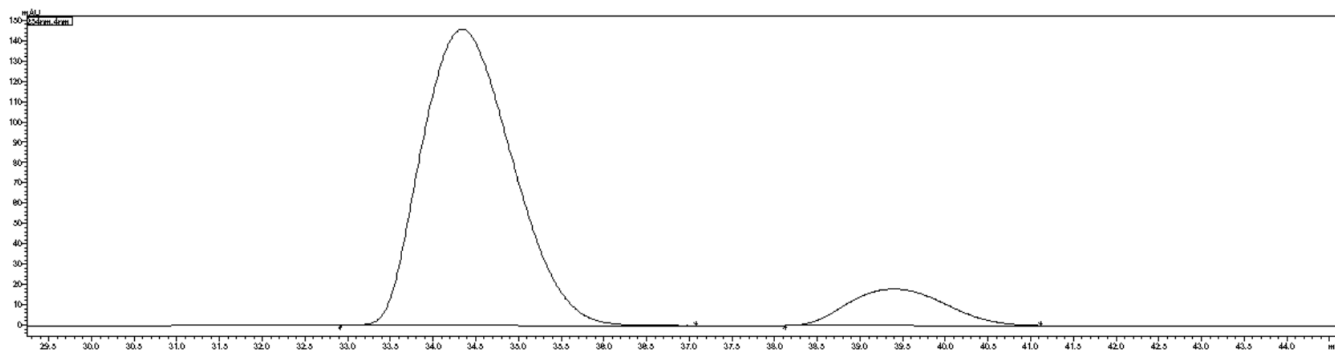

racemic-**4ab**

**(R)-4ab**

| Peak | tR (min) | Area (%) |
|------|----------|----------|
| 1    | 32.4     | 50.1     |
| 2    | 37.0     | 49.9     |

| Peak | tR (min) | Area (%) |
|------|----------|----------|
| 1    | 34.3     | 88.2     |
| 2    | 39.3     | 11.8     |

**(R)-S-(2,4,6-Trimethylphenyl) 3-phenyl-3-(cyanoamino)propanethioate (4ac)**

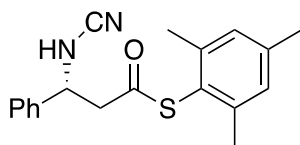

**racemic-4ac**

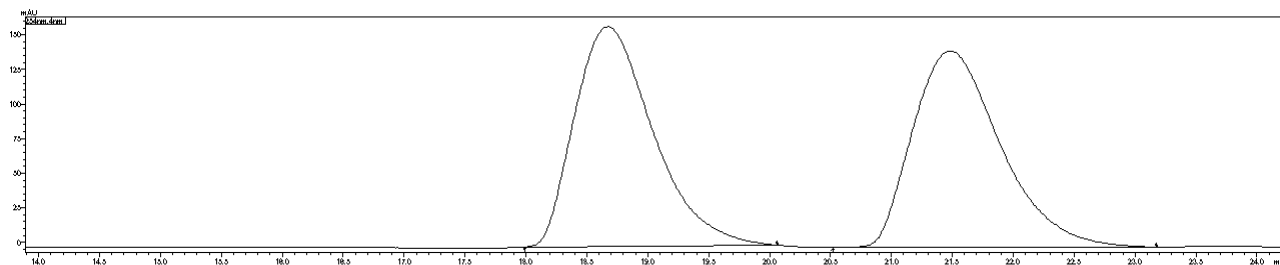

**(R)-4ac**

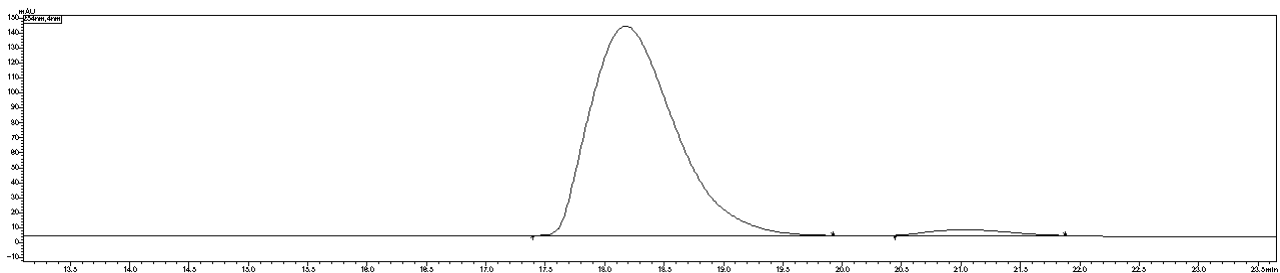

**racemic-4ac**

**(R)-4ac**

| Peak | tR (min) | Area (%) |
|------|----------|----------|
| 1    | 18.6     | 50.0     |
| 2    | 21.3     | 50.0     |

| Peak | tR (min) | Area (%) |
|------|----------|----------|
| 1    | 18.2     | 97.5     |
| 2    | 20.0     | 2.5      |

**(R)-S-(2,4,6-Trimethylphenyl) 3-(4-fluorophenyl)-3-(cyanoamino)propanethioate (5)**

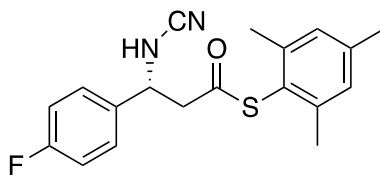

racemic-5

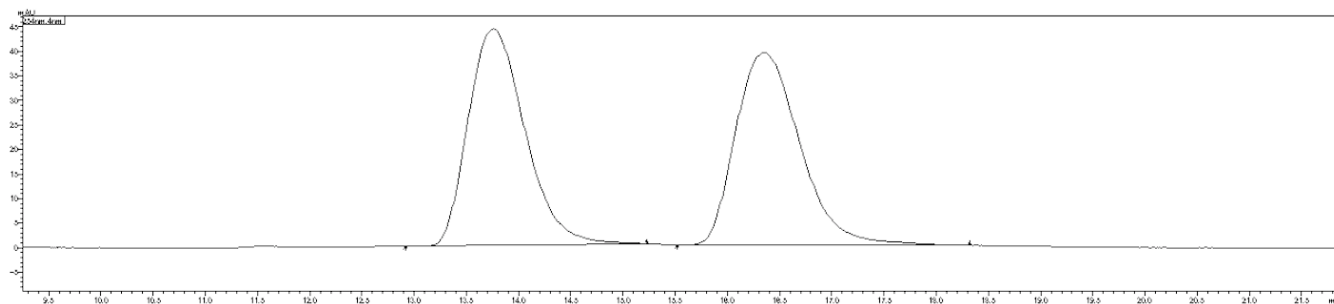

(R)-5

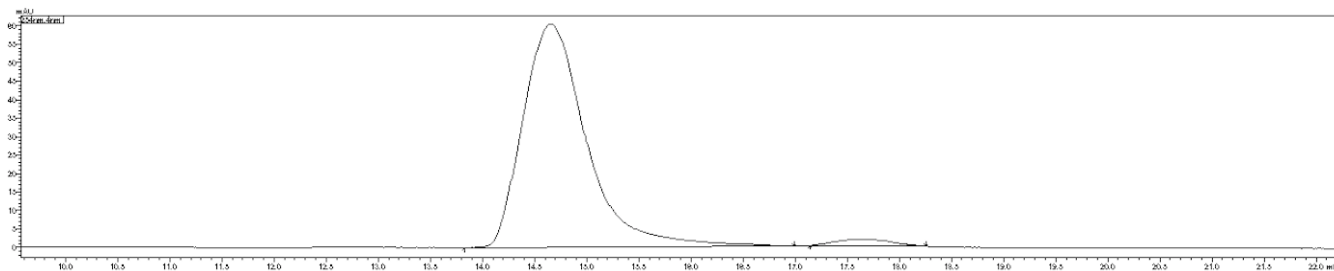

racemic-5

(R)-5

| Peak | tR (min) | Area (%) |
|------|----------|----------|
| 1    | 13.8     | 49.9     |
| 2    | 16.4     | 50.1     |

| Peak | tR (min) | Area (%) |
|------|----------|----------|
| 1    | 14.7     | 97.4     |
| 2    | 17.6     | 2.6      |

**(R)-S-(2,4,6-Trimethylphenyl) 3-(4-chlorophenyl)-3-(cyanoamino)propanethioate (6)**

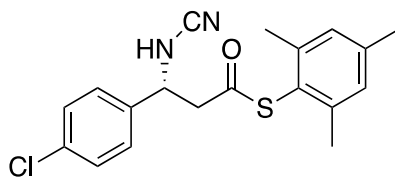

racemic-6

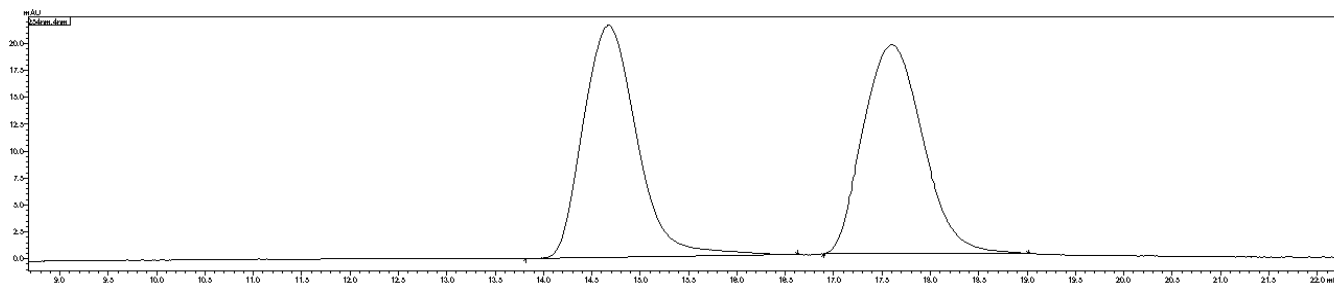

(R)-6

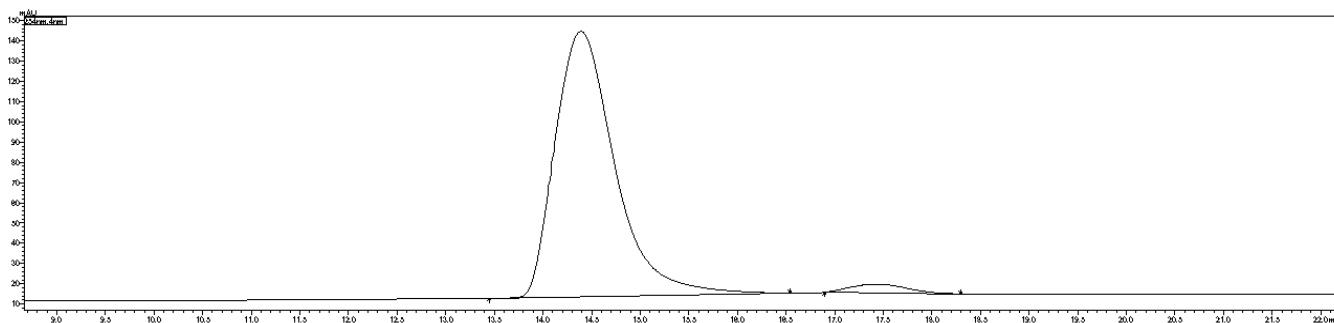

racemic-6

(R)-6

| Peak | tR (min) | Area (%) |
|------|----------|----------|
| 1    | 14.7     | 50.0     |
| 2    | 17.6     | 50.0     |

| Peak | tR (min) | Area (%) |
|------|----------|----------|
| 1    | 14.4     | 97.0     |
| 2    | 17.4     | 3.0      |

**(R)-S-(2,4,6-Trimethylphenyl) 3-(3-chlorophenyl)-3-(cyanoamino)propanethioate (7)**

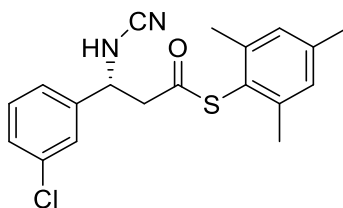

racemic-7

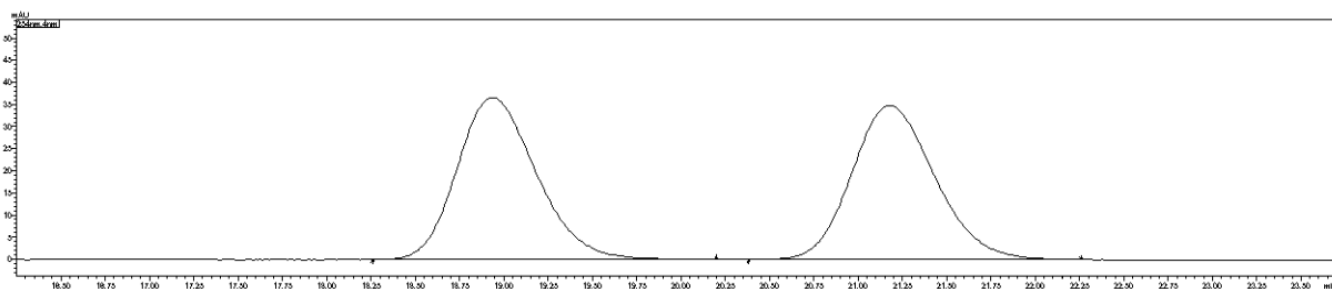

(R)-7

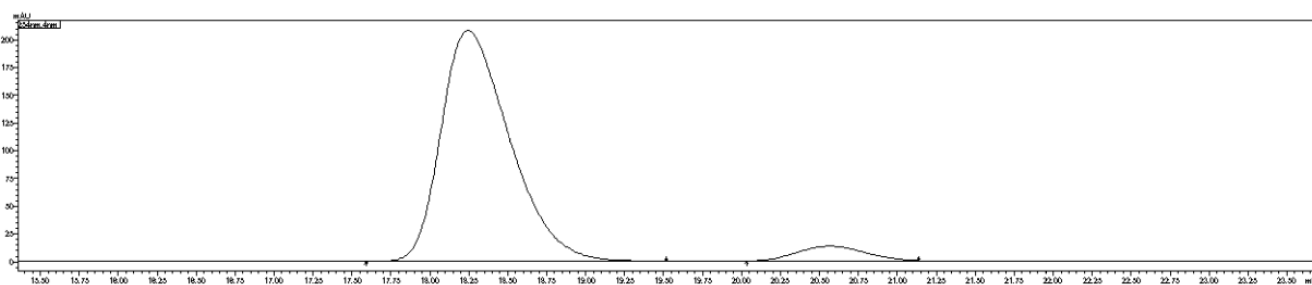

racemic-7

(R)-7

| Peak | tR (min) | Area (%) |
|------|----------|----------|
| 1    | 18.9     | 50.1     |
| 2    | 21.2     | 49.9     |

| Peak | tR (min) | Area (%) |
|------|----------|----------|
| 1    | 18.2     | 94.2     |
| 2    | 20.6     | 5.8      |



**(R)-S-(2,4,6-Trimethylphenyl) 3-(2-chlorophenyl)-3-(cyanoamino)propanethioate (8)**

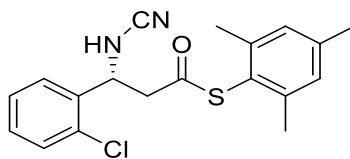

racemic-8

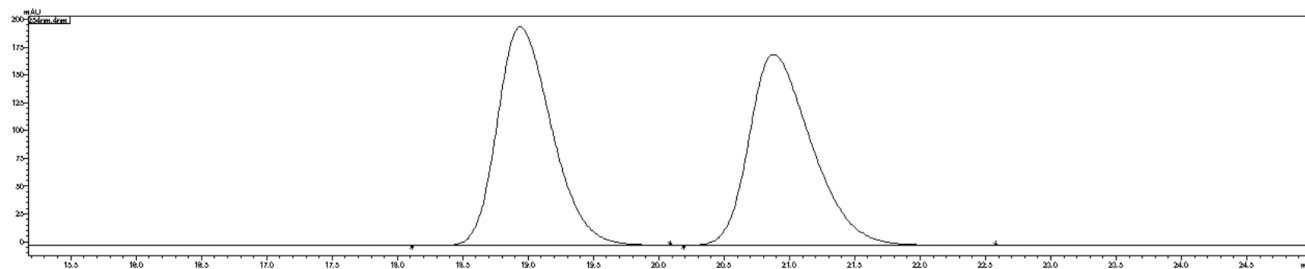

**(R)-8**

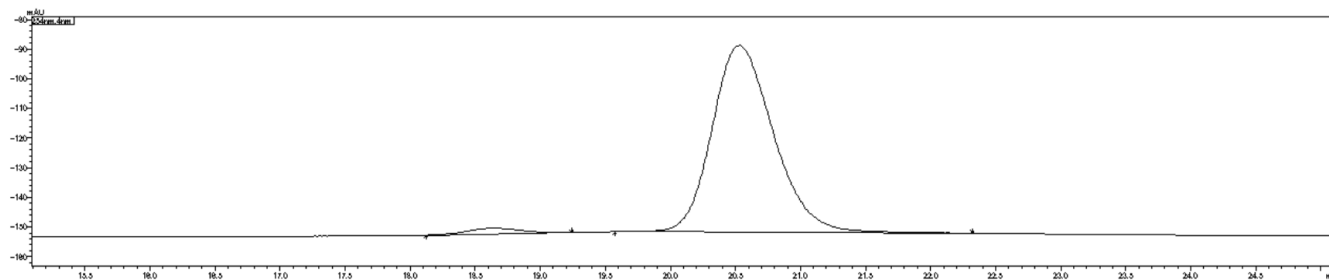

racemic-8

**(R)-8**

| Peak | tR (min) | Area (%) |
|------|----------|----------|
| 1    | 18.9     | 49.9     |
| 2    | 20.9     | 50.1     |

| Peak | tR (min) | Area (%) |
|------|----------|----------|
| 1    | 18.6     | 2.4      |
| 2    | 20.5     | 97.6     |

**(R)-S-(2,4,6-Trimethylphenyl) 3-(4-bromophenyl)-3-(cyanoamino)propanethioate (9)**

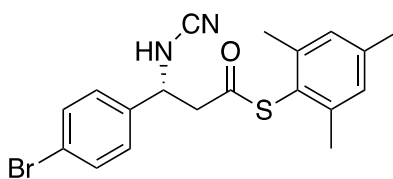

racemic-9

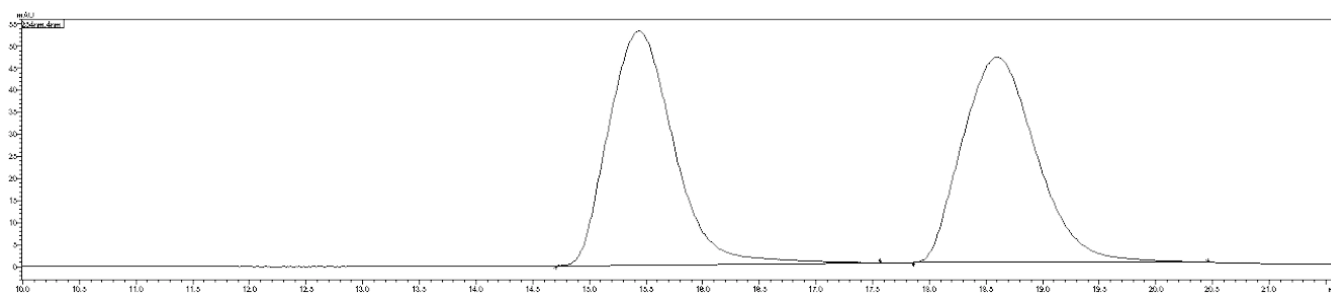

**(R)-9**

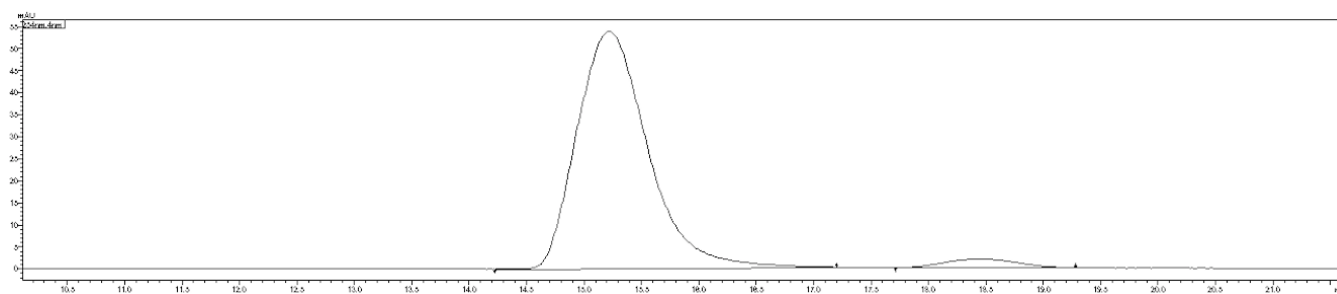

racemic-9

**(R)-9**

| Peak | tR (min) | Area (%) |
|------|----------|----------|
| 1    | 15.4     | 50.0     |
| 2    | 18.6     | 50.0     |

| Peak | tR (min) | Area (%) |
|------|----------|----------|
| 1    | 15.2     | 96.6     |
| 2    | 18.5     | 3.4      |

**(R)-S-(2,4,6-Trimethylphenyl) 3-(4-trifluoromethylphenyl)-3-(cyanoamino)propanethioate (10)**

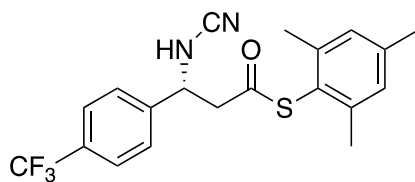

racemic-10

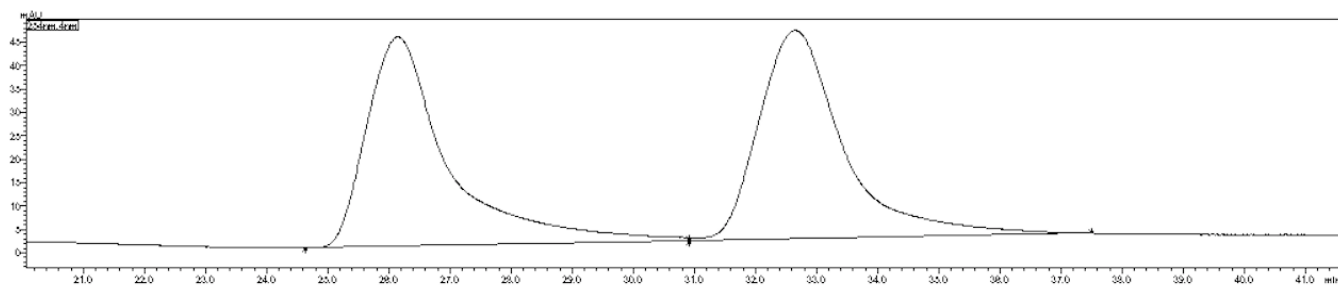

**(R)-10**

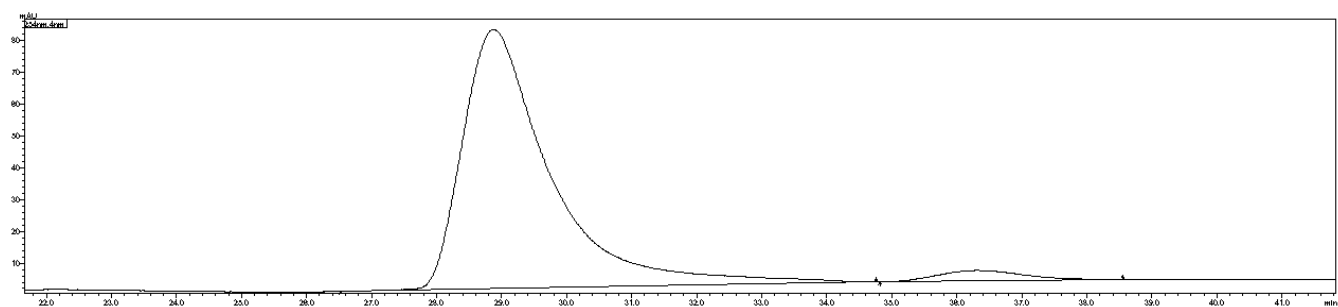

racemic-10

**(R)-10**

| Peak | tR (min) | Area (%) |
|------|----------|----------|
| 1    | 26.1     | 49.9     |
| 2    | 36.7     | 50.1     |

| Peak | tR (min) | Area (%) |
|------|----------|----------|
| 1    | 28.8     | 96.3     |
| 2    | 36.2     | 3.7      |

**(R)-S-(2,4,6-Trimethylphenyl) 3-(4-methylphenyl)-3-(cyanoamino)propanethioate (11)**

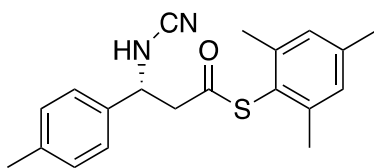

**racemic-11**

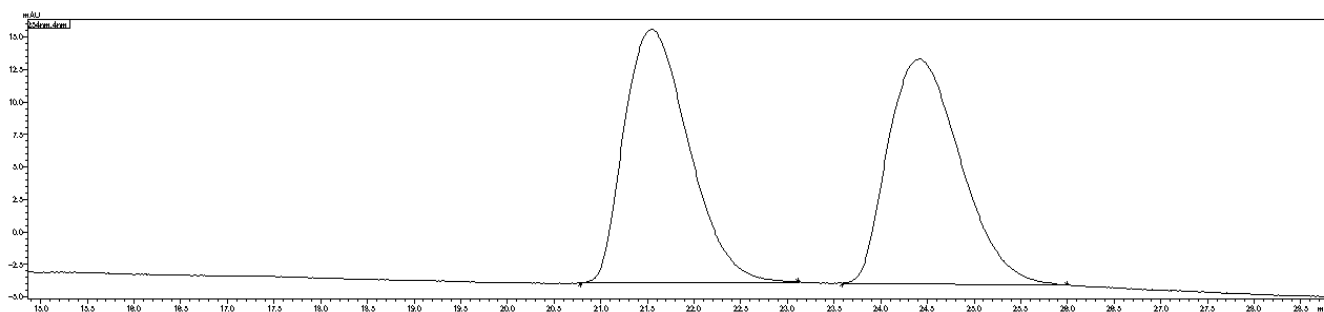

**(R)-11**

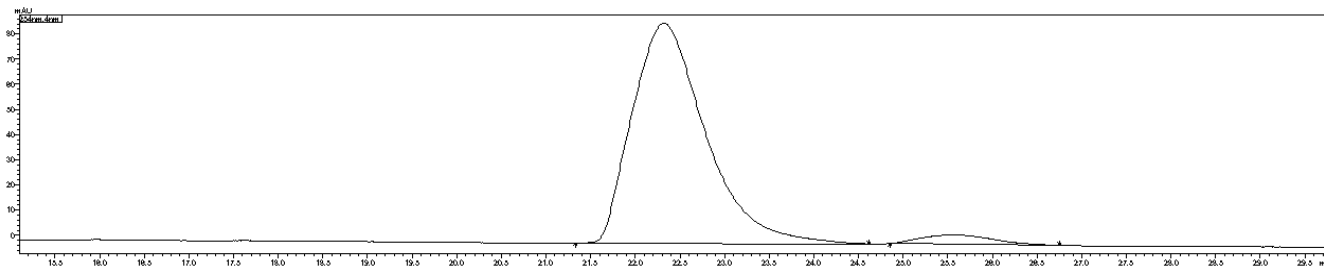

**racemic-11**

**(R)-11**

| Peak | tR (min) | Area (%) |
|------|----------|----------|
| 1    | 21.5     | 49.9     |
| 2    | 24.4     | 50.1     |

| Peak | tR (min) | Area (%) |
|------|----------|----------|
| 1    | 22.3     | 96.1     |
| 2    | 25.6     | 3.9      |

**(R)-S-(2,4,6-Trimethylphenyl) 3-(4-methoxyphenyl)-3-(cyanoamino)propanethioate (12)**

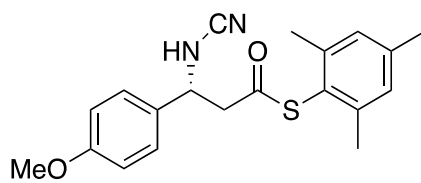

racemic-12

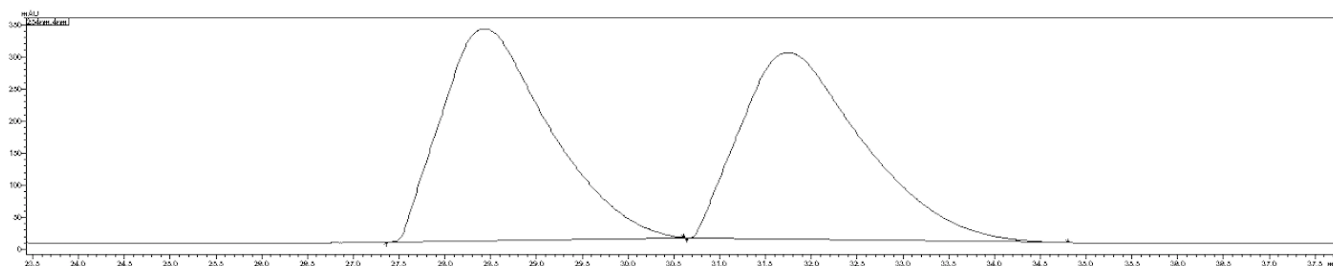

(R)-12

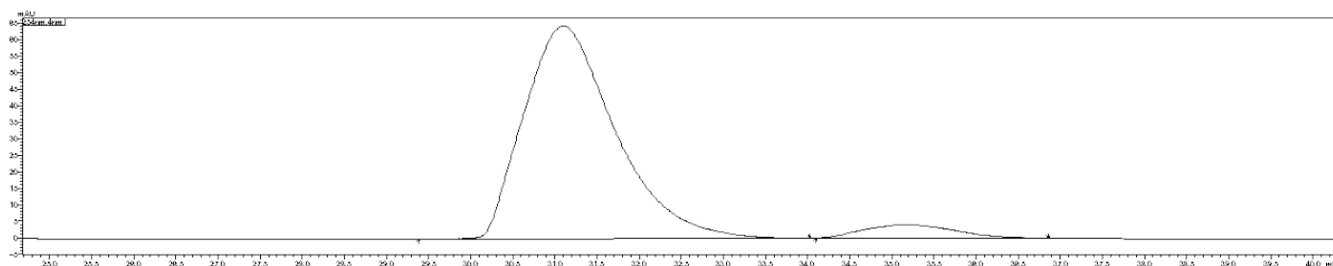

racemic-12

(R)-12

| Peak | tR (min) | Area (%) |
|------|----------|----------|
| 1    | 28.4     | 49.9     |
| 2    | 31.7     | 50.1     |

| Peak | tR (min) | Area (%) |
|------|----------|----------|
| 1    | 31.1     | 94.0     |
| 2    | 35.1     | 6.0      |

**(R)-S-(2,4,6-Trimethylphenyl) 3-(2-naphthyl)-3-(cyanoamino)propanethioate (13)**

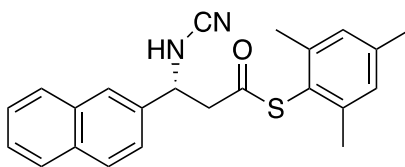

racemic-13

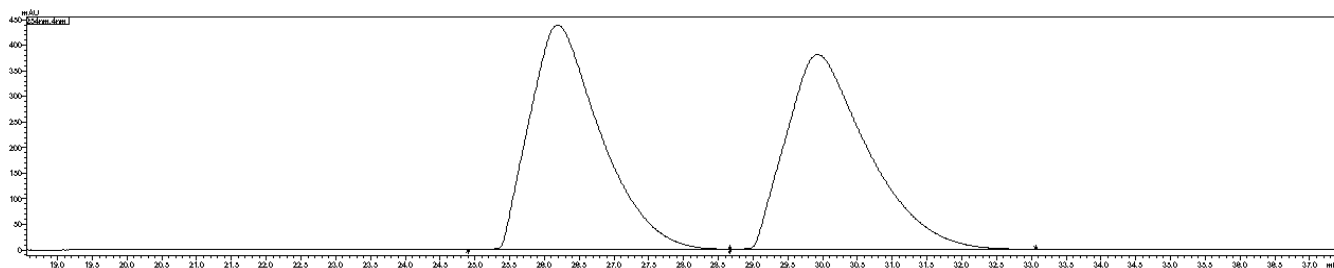

(R)-13

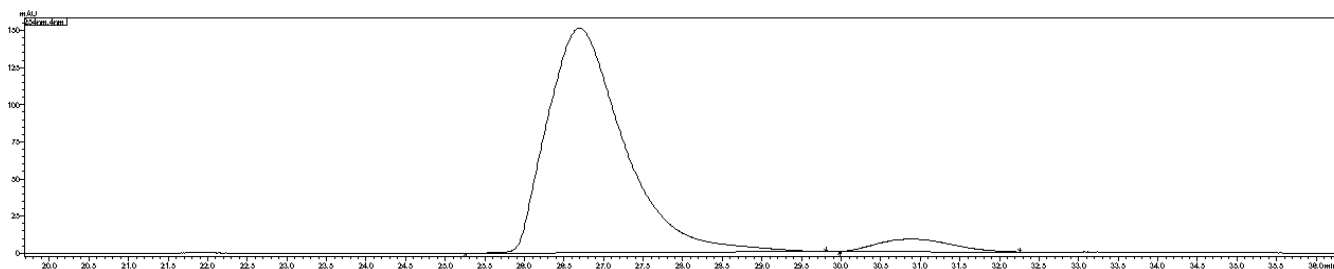

racemic-13

(R)-13

| Peak | tR (min) | Area (%) |
|------|----------|----------|
| 1    | 26.2     | 50.0     |
| 2    | 29.9     | 50.0     |

| Peak | tR (min) | Area (%) |
|------|----------|----------|
| 1    | 26.7     | 94.9     |
| 2    | 30.9     | 5.1      |

**(R)-S-(2,4,6-Trimethylphenyl) 3-(2-furyl)-3-(cyanoamino)propanethioate (14)**

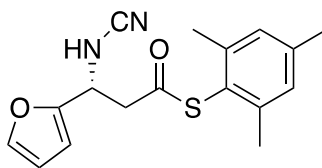

**racemic-14**

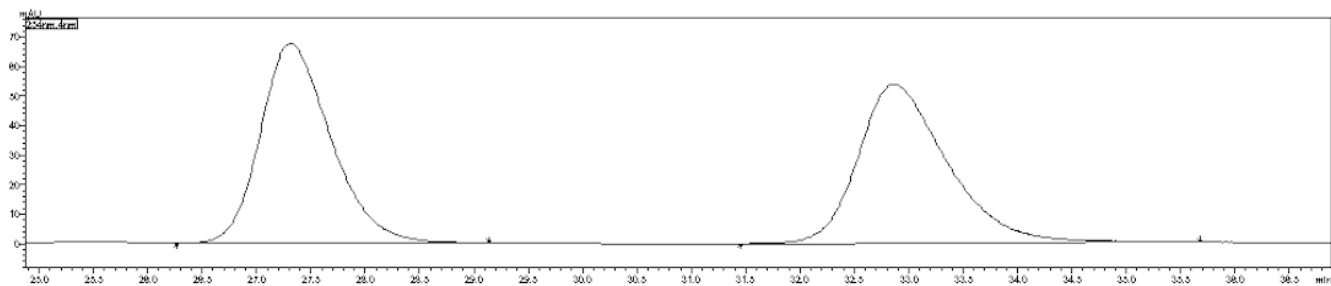

**(R)-14**

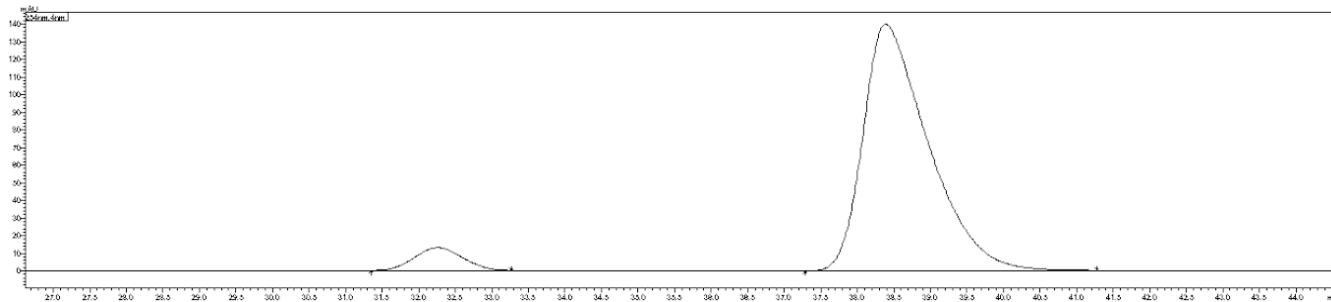

**racemic-14**

**(R)-14**

| Peak | tR (min) | Area (%) |
|------|----------|----------|
| 1    | 27.3     | 49.9     |
| 2    | 32.9     | 50.1     |

| Peak | tR (min) | Area (%) |
|------|----------|----------|
| 1    | 32.2     | 6.5      |
| 2    | 38.4     | 93.5     |

**(R)-S-(2,4,6-Trimethylphenyl) 3-(2-thienyl)-3-(cyanoamino)propanethioate (15)**

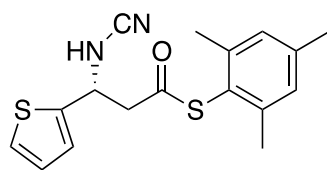

**racemic-15**

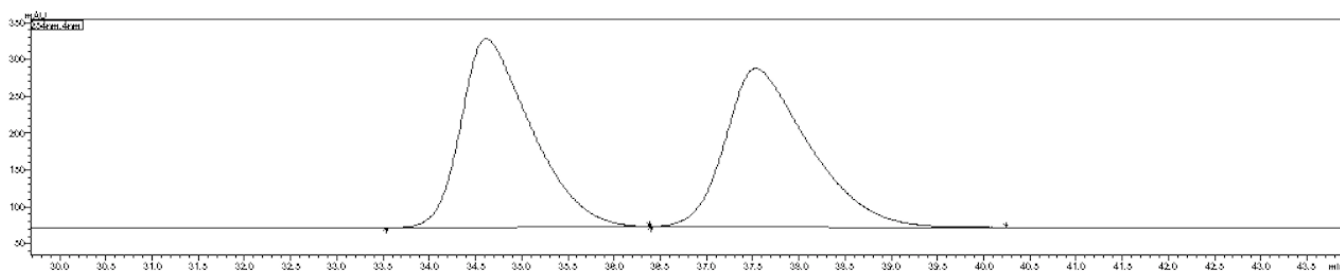

**(R)-15**

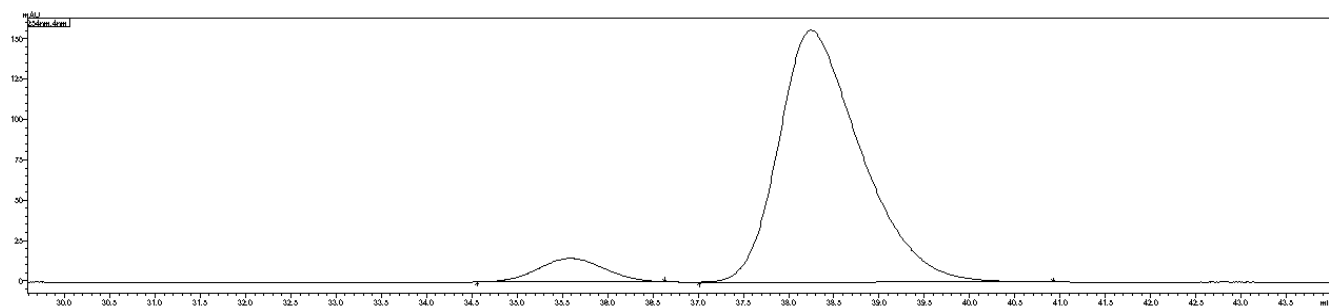

**racemic-15**

**(R)-15**

| Peak | tR (min) | Area (%) |
|------|----------|----------|
| 1    | 34.6     | 50.1     |
| 2    | 37.5     | 49.9     |

| Peak | tR (min) | Area (%) |
|------|----------|----------|
| 1    | 35.6     | 7.0      |
| 2    | 38.2     | 93.0     |



**(R)-2-(2,4,6-Trimethylphenyl)thio-4-oxo-6-phenyl-5,6-dihydropyrimidone (16)**

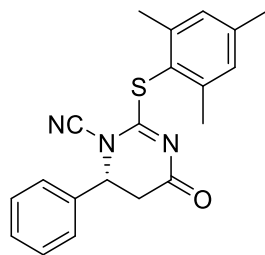

racemic-16

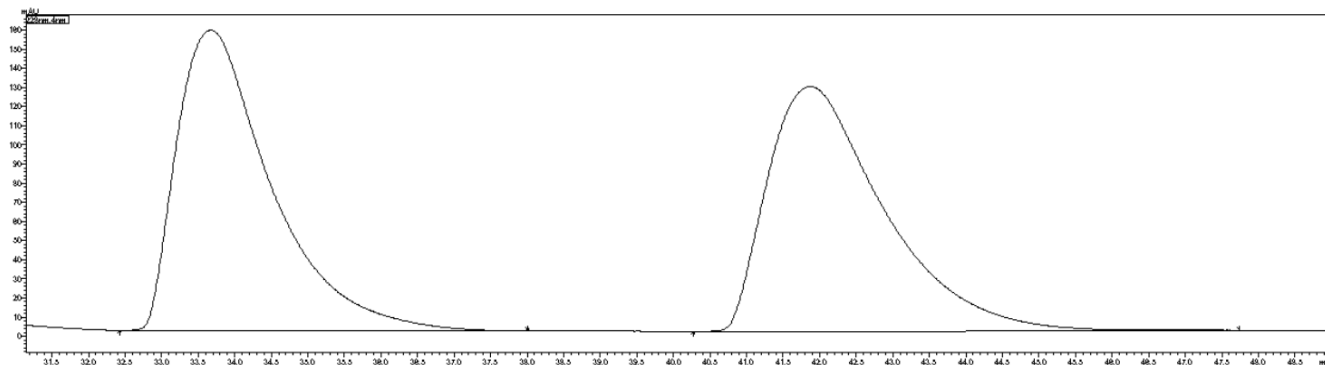

**(R)-16**

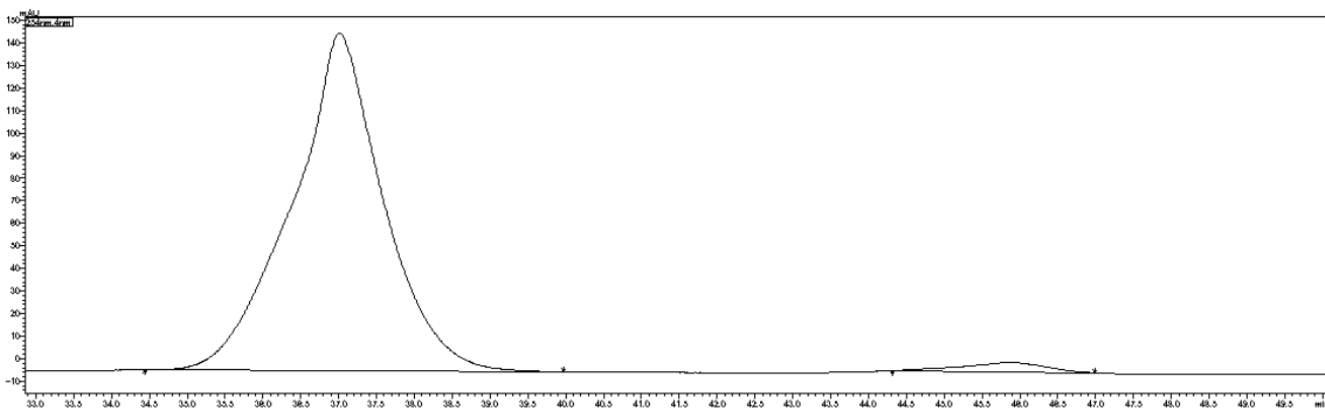

racemic-16

**(R)-16**

| Peak | tR (min) | Area (%) |
|------|----------|----------|
| 1    | 33.8     | 49.9     |
| 2    | 41.9     | 50.1     |

| Peak | tR (min) | Area (%) |
|------|----------|----------|
| 1    | 36.8     | 97.6     |
| 2    | 45.8     | 92.4     |

**(R)-Methyl 3-phenyl-3-(cyanoamino)propanoate (17)**

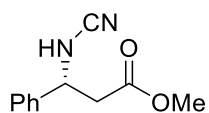

racemic-17

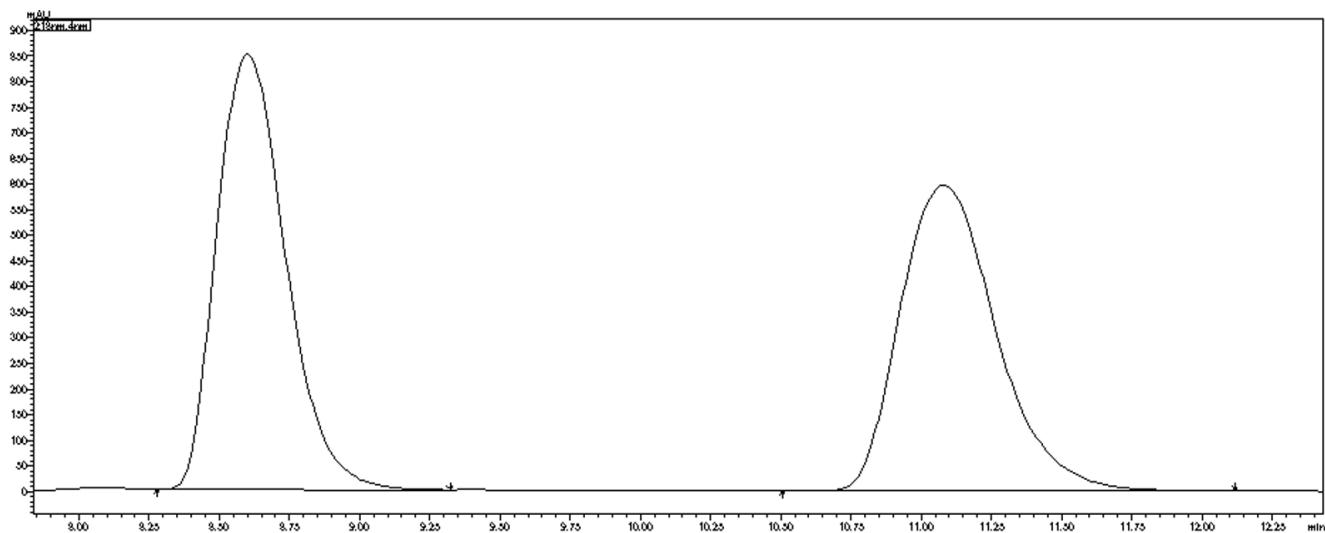

**(R)-17**

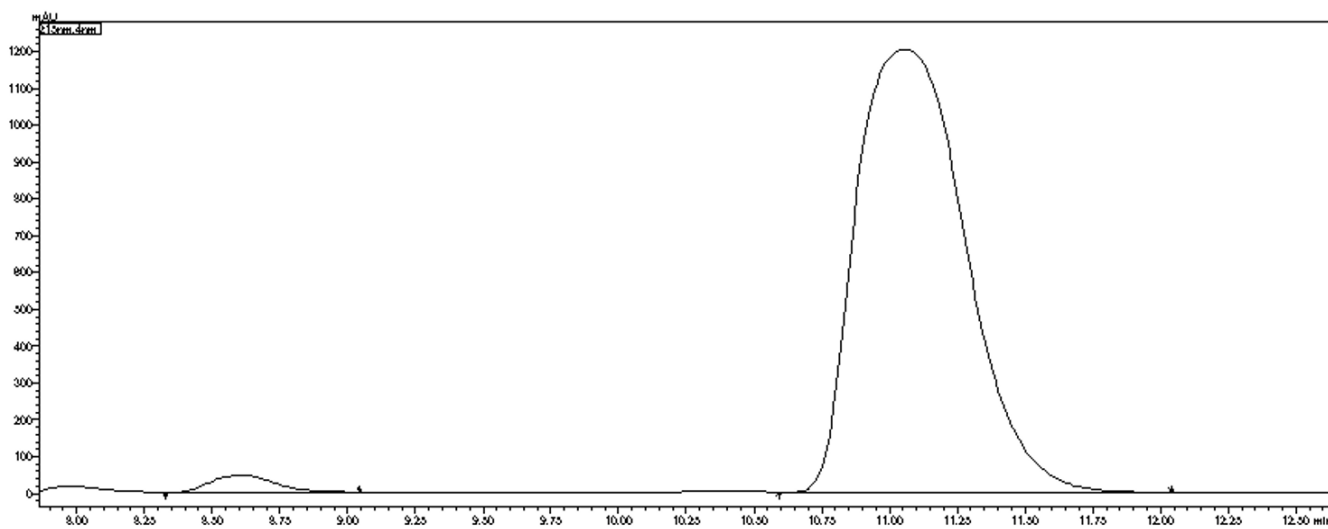

racemic-17

(R)-17

| Peak | tR (min) | Area (%) |
|------|----------|----------|
| 1    | 8.6      | 50.1     |
| 2    | 11.1     | 49.9     |

| Peak | tR (min) | Area (%) |
|------|----------|----------|
| 1    | 8.6      | 3.4      |
| 2    | 11.1     | 96.6     |

**(R)-2-(2,4,6-Trimethylphenyl)thio-3-phenyl-3-(2H-tetrazole-5-amino)propanoate (18)**

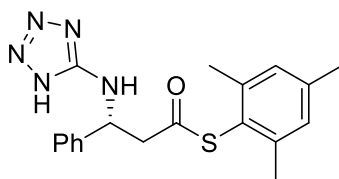

**racemic-18**

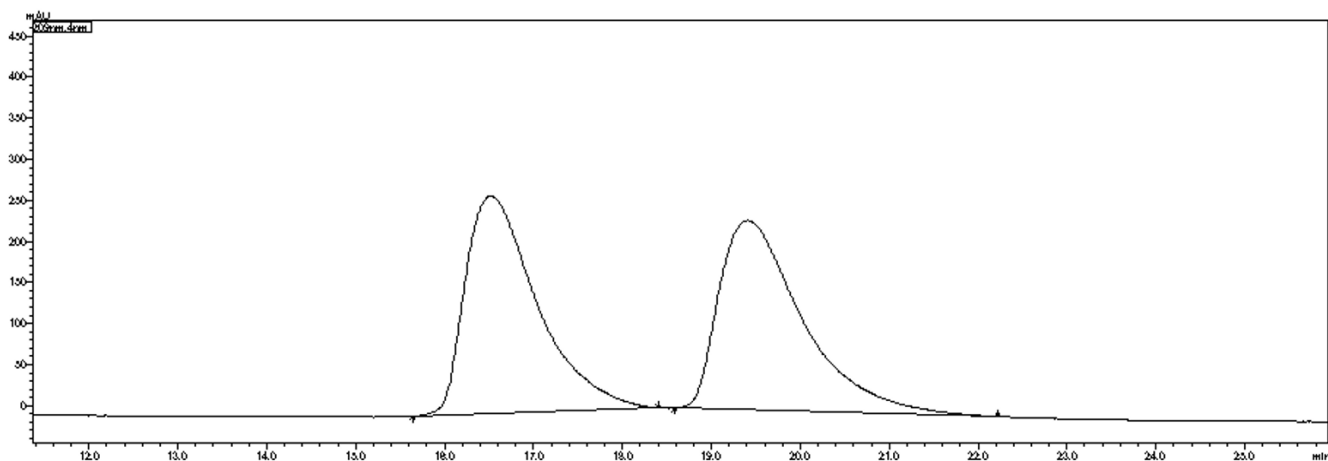

**(R)-18**

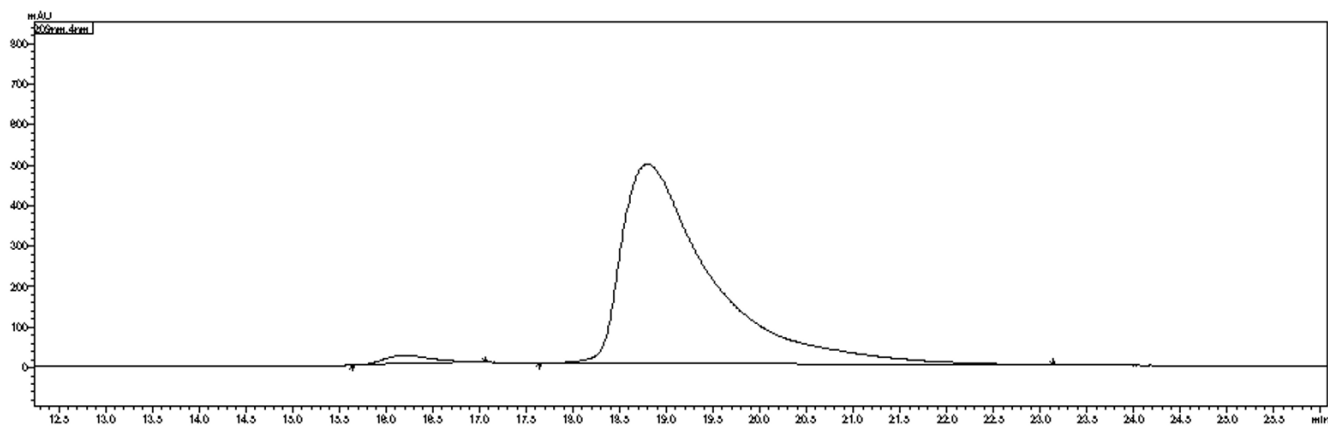

**racemic-18**

**(R)-18**

| Peak | tR (min) | Area (%) |
|------|----------|----------|
| 1    | 16.5     | 49.9     |
| 2    | 19.4     | 50.1     |

| Peak | tR (min) | Area (%) |
|------|----------|----------|
| 1    | 16.2     | 2.3      |
| 2    | 18.8     | 97.7     |
